# Supplementary material for: Kinesin-4 KIF21B limits microtubule growth to allow rapid centrosome polarization in T cells
Source: eLife. 2020 Dec 21;9:e62876. doi: 10.7554/eLife.62876 (PMC7817182; doi:10.7554/eLife.62876)
Supplement: Figure 1—figure supplement 2—source data 1. [file elife-62876-fig1-figsupp2-data1.xlsx]

## Sheet: 1-S2A
Figure 1 -S2A		hrs	WT_exp1	KO#1_exp1	KO#2_exp1	WT_exp2	KO#1_exp2	KO#2_exp2	WT_exp3	KO#1_exp3	KO#2_exp3
Fold change IL-2 mRNA levels		0	1	1	1	1	1	ND	1	1	1
		1	1.3	2.4	1.7	0.792509	0.953299	ND	1.68471	3.01467	3.10372
		4	14.3	13.8	13.4	2.12874	4.29304	ND	6.06917	13.5573	17.2557

## Sheet: 1-S2B
Figure 1- S2B		hrs	WT_exp1	KO#1_exp1	KO#2_exp1	WT_exp2	KO#1_exp2	KO#2_exp2	WT_exp3	KO#1_exp3	KO#2_exp3
Fold change IL-2 mRNA levels		0	1	1	1	1	1	N.D.	1	1	1
		1	102.3	297.8	41.9	16.274	18.0259	N.D.	18.1136	44.9267	26.0642
		4	9721.7	5990.7	7782.4	1642.3	838.403	N.D.	1082.01	1679.71	1008.85

## Sheet: 1-S2D
Figure 1 - S2D		WT	KO#1	KO#2
Cell volume		1212	1038	1091
(µm3)		1030	1700	710
		1013	2677	905
		1076	3500	489
		602	1782	892
		1967	2572	1802
		1567	1341	1166
		828	1455	1215
		862	1611	868
		1624	2630	1394
		1426	2032	1365
		1626	1502	731
		753	1390	842
		2520	1328	869
		4190	1953	1186
		1767	1362	1376
		1528	758	1409
		1563	1516	1424
		1424	865	935
		557	741	1673
		2174	1787	1516
		1095	1507	903
		1530	1275	761
		2778	1151	1294
		1070	1490	972
		1553	845	2083
		1653	1868	1742
		2372	1172	1480
		1909	776	1395
		3429	1904	2345
		2055	1258	1664
		2629	1402	2304
		1555	1960	1660
			1868	3628

## Sheet: 1-S2G
Figure 1- S2G		WT	KO#1	KO#2
Time from start synapse formation to maximum synapse size		1	0.896	2.354
(min)		1.604	1.917	1.208
		1.646	1.208	1.938
		2.021	1.125	1.542
		2.146	0.875	1.688
		1.104	1.917	1.958
		0.854	2.604	1.229
		1.771	2.271	2.709
		2.042	3.396	2.334
		1.583	2.479	3.125
		2.021	1.646	2.834
		1.667	1.854	2.667
		1.167	2.271	2.167
		0.875	4.896	2.125
		1.083	2.188	2.521
		1.729	1.771	3.375
		2.229	2.5	4.188
		1.104	2.75	1.292
		1.896	1.063	1.646
		1.271	1.708	1.833
		1.333	2.167	1.75
		1.479	2.083	2
		2.167	2.521	1.958
		1.917	1.958	1.542
		1.875	1.354	1.813
		0.833	2.042	2.896
		1.313	1.667	2.292
		1.229	4.042	1.479
		0.979	2.5	2.563
		2.146	2.188	1.208
		1.75	1.417	1.958
		2.375	1.5	4.625
		1.25	1.938	2.604
		0.729	1.813	3.104
		2.292	1.208	1.938
		1.354	2.75	1.146
		1.604	2.729	2.417
		1.917	1.625	1.604
		2.167	1.75	1.917
		1.542	3.25	3.729
		1.625	1.333	1.875
		0.729	1.771	1.875
		1.979	0.979	1.375
		1.146	2.021	1.813
		2.167	1.708	1.625
		1.563	1.667	1.333
		1.938	2.334	0.792
		1.479	2.167	1.438
		2	1.354	2.021
		2.709	2.771	1.5
		1.646	1.313	1.438
		2.375	1.736	1.083
		1.729	1.083	1.917
		1.792	2.396	1.833
		2.917	1.375	2.771
		2.375	2.236	1.25
		1.042	1.778	1.667
		0.958	1.042	1.139
		1.708	1.958	2.875
		1.833	1.695	1.958
		2.5	2.209	2.104
		1.313	1.521	1.375
		1.563	4.236	0.646
		2.063	1.396	4.75
		1.292	2.271	6.73
		2.875	2.889	1.292
		1.917	0.486	2.792
		1.188	2.236	4
		2.313	2.681	2.521
		2.625	1.931	1.75
		2.188	1.82	1.417
		2.542	2.139	1.146
		0.938	1.639	1.875
		0.979	2.292	1.542
		1.458	2.271	1.229
		1.458	2.209	2.104
		0.917	2.334	1.063
		1.208	1.958	0.646
		1.542	1.917	0.833
		1.708	1.5	1.979
		1.75	2.729	2.979
		1.958	1.375	2.667
		2.083	2.021	2.771
		1.229	1.708	2.354
		0.875	1.021	2.625
		2.083	1.063	1.521
		2.042	1.417	1.458
			0.938	2.771
			2.146	3.917
			2.042	2.917
			1.646	2.688
			2.271
			2.292
			0.75
			2.854
			1.458
			3.271
			2.563
			1.229
			1.563
			2.25
			1.583
			2.667
			2.021
			4.271
			3.271
			2.792

## Sheet: 1-S2I
Figure 1- S2I
Percentage of cells with CEP135-staining in TIRF plane			% of cells with CEP135-staining in TIRF plane				# of cells quantified
(% of cells)		Experiment#	PDL (control)	PDL + antiCD3	PDL + antiHA		PDL (control)	PDL + antiCD3	PDL + antiHA
		1	0.26087	0.857143	0.220588		92	77	68
		2	0.207792	0.777778	0.317647		77	72	85
		3	0.316832	0.776699	0.24359		101	103	78
		4	0.309524	0.758621	0.2125		84	58	80
						Total:	354	310	311
