# Supplementary material for: Kinesin-4 KIF21B limits microtubule growth to allow rapid centrosome polarization in T cells
Source: eLife. 2020 Dec 21;9:e62876. doi: 10.7554/eLife.62876 (PMC7817182; doi:10.7554/eLife.62876)
Supplement: Figure 1—source data 1. [file elife-62876-fig1-data1.xlsx]

## Sheet: 1E
Figure 1E		WT	KO#1	KO#2	KO#1+KIF21B-GFP	KO#2+KIF21B-GFP
Cell surface area		423557	180932	173986	301614	410518
(μm²)		376037	244263	185330	308042	511733
		388852	211645	218872	284584	395616
		325605	298673	204545	294163	350604
		358111	362928	365617	424985	389398
		485305	200707	224446	362144	387928
		337957	149995	237947	218844	315661
		376611	204054	161045	407941	457925
		293407	301810	246434	460306	373530
		333784	213606	197402	205091	319148
		381555	128343	249823	402759	392185
		297497	164196	304863	399524	241560
		473107	231771	448402	487224	486930
		552544	170260	334414	342159	352061
		624544	144645	284570	344988	322090
		293071	186058	382312	254221	279864
		365912	262848	209951	346318	418039
		350702	189111	386513	294920	346655
		312034	250075	244655	265509	333364
		430349	205973	279038	251224	444144
		377438	151941	241546	278240	320129
		421708	306306	201562	277413	324316
		423431	236392	305508	466468	377424
		376808	195679	347775	414481	291951
		361668	253661	367368	395042	322566
		335997	319429	264977	375421	420405
		526564	358909	235146	270355	296432
		399118	256364	326515	352817	279990
		290088	164532	183915	331361	253170
		468751	179209	287371	394552	414789
		337159	282035	142068	458303	480277
		292693	187388	165260	319415	487210
		193579	243969	326053	296838	290830
		383950	260299	227093	414831	461076
		231420	249375	294822	449354	569322
		256308	243395	277987	437842	440895
		316446	304247	297357	251266	227261
		320885	301432	254571	265187	392899
		348685	459088	304793	407717	453948
		383054	249431	240580	164168	452015
		259025	265957	248927	429509	355870
		304163	297483	281237	292147	395714
		374651	300872	219572	185652	303897
		382732	310017	186828	215483	406877
		697118	439032	145485	359497	281727
		257946	347439	199573	235524	225930
		351472	263240	176436	290102	475712
		633003	379202	326347	289276	398684
		377578	193187	214208	312090	402521
		385253	208564	313602	436483	280186
		388418	136382	337173	309611	376233
		417226	104534	190399	175526	323546
		634123	263380	337803	214474	586632
		417674	276937	255481	252694	445909
		393067	238129	215791	278954	295536
		493806	295130	168411	235594	399426
		419285	188397	363012	307510	690886
		516004	186114	334582	194391	352117
		493778	250145	335422	177893	321193
		557403	265383	310087	170876	339568
		362536	126368	338378	216505	326501
		435167	236336	230020	404328	339666
		434551	169756	280690	423949	278310
		483625	291194	311656	434285	428276
		329750	168243	217093	467028	297875
		555149	197402	328644	327482	308575
		465180	271937	286321	339372	310885
		435587	296376	152782	405616	406176
		396639	235174	308084	378376	313350
		462981	251112	116284	389930	361542
		234698	103638	211533	324765	267134
		365085	123833	196604	450769	433542
		324624	206295	399440	411498	431427
		328294	172473	238773	549981	305900
		426694	299093	266139	185890	347957
		399440	174560	301082	254193	198705
		934883	240482	255649	474017	274654
		601898	260411	247442	259473	501551
		406848	225580	212360	180092	371626
		568972	301614	359553	343531	461146
		412549	208900	353433	520052	486594
		580512	242008	392157	313336	265229
		362424	339596	310423	368979	218424
		370.491	333238	298029	300648	246854
		316.628	237121	320535	232737	524772
		608.928	283660	287427	251322	370323
		333.91	173775	445923	337215	284570
		379.931	197108	217822	262190	246042
		359.777	189517	318532	344946	382914
		392.955	258492	246574	321319	367634
		350.59	276251	373376	342943	396387
		481.328	220553	274738	268254	408333
		511.859	270061	268982	362928	490109
		502.111	196072	315507	335997	208928
		383.264	252680	349330	386821	203172
		294.261	176899	325647	418375	336151
		587.893	208746	298981	581912	316151
		287.581	160737	469297	273856	255495
		427.184	272483	406512	343167	278394
		507.629	155037	412605	351780	502279
		223.143	166465	245916	521480	336361
		675.369	294051	351976	377872	293337
		143.636	102643	268212	453093	232303
		465.53	155793	285760	461104	345226
		515.724	251966	253577	449312	352677
		249.697	128245	329414	234053	317356
		332.341	268576	311922	270439	346094
		531.83	221365	310087	352453	284528
		575.456	305690	267890	309415	325017
		278.982	323126	335408	295102	481720
		152.936	172529	383614	529659	372774
		335.296	371318	216995	341333	361696
		333.56	485473	264332	496747	312818
		375.113	279906	273954	448248	331613
		338.868	450390	268436	351542	309779
		219.936	349175	190638	382662	234614
		443.864	270845	286587	273674	567417
		654.389	272231	339148	487238	363615
		292.035	264360	275242	318798	295830
		133.945	287175	269542	365155	342425
		139.561	392997	284136	469269	510556
		257.89	308771	232863	377424	353489
		276.839	552025	325395	378278	423234
		243.059	598102	479759	371444	418389
		454.536	337453	225804	257330	505430
		557.123	373572	300046	117503	401050
		261.644	285326	327762	369889	311698
		308.308	456497	260789	218452	488946
		458.107	273940	345632	456469	386779
		287.987	254039	435993	300.284	407983
		296.6	179195	202052	393.698	181.198
		337.341	174252	295620	221.897	184.209
		291.993	418949	208088	681.391	416.708
		326.501	341893	274752	241.084	348.783
			170694	331445	408.809	296.866
			252036	271531	307.846	217.121
			217135	265803	498.148	402.031
			220875	286979	368.474	266.335
			289009	359917	410.378	293.001
			181674	302132	243.059	352.957
			410364	217695	382.956	367.802
			201604	274584	371.332	335.661
			358167	227625	249.585	382.998
			303757	277609	457.631	241.98
			230622	332313	277.455	185.274
			318938	323406	607.262	188.453
			325073	286951	404.818	337.733
			260859	282007	352.005	251.028
			298099	256168	334.778	255.061
			206085	287847	181.1	774.945
			415280	250706	332.089	249.557
			243129	183285	250.817	411.456
			214432	386835	255.873	504.072
			269458	225132	326.277	271.055
			271.937	235944	286.11	427.45
			366.724	368657	450.769	354.343
			253.297	402759	308.084	449.242
			224.698	286.951	484.059	687.175
			205.861	340.969	360.422	313.841
			225.972	193.047	223.914	456.623
			265.047	139.883	191.38	357.466
			217.85	217.107	597.85	411.064
			417.324	252.414	316.74	407.073
			268.268	107.153	198.228	388.46
			237.527	129.099	360.59	342.215
			225.832	181.1	639.207	435.979
			231.967	184.545	747.453	274.892
			384.356	344.428	348.853	207.654
			227.163	383.278	529.561	335.731
			271.839	117.601	298.141	216.995
			295.284	136.508	352.565	97.8957
			216.883	175.078	221.211	242.246
			231.014	154.995	187.052	351.402
			329.428	269.178	256.994	692.511
			293.197	270.817	290.116	172.473
			201.856	244.725	270.523	177.263
			573.817	88.0081	285.424	189.951
			406.456	186.786	254.249	340.016
			173.495	180.26	195.497	254.543
			197.5	311.6	289.766	336.781
			263.94	200.077	283.337	327.341
			308.127	263.716	242.765	285.648
			211.855	562.613	288.099	236.546
			351.99	229.04	177.739	640.93
			272.469	174.658	210.189	224.068
			271.293	299.541		365.757
			330.815	431.918		345.086
			650.103	248.829		551.199
			414.467	171.451		171.521
			438.528	328.756		363.251
			191.17	413.529		304.107
			355.408	172.627		474.409
			185.092	230.048		351.528
			273.436	198.62		195.119
			357.62	321.263
			326.585	227.919
			203.886	198.242
			308.238	257.274
			314.415	628.017
			279.528	166.745
			338.616	224.642
			178.593	119.127
			247.19	298.127
			317.034	423.235
			217.597	243.535
			209.012	460.838
			258.815	299.611
			202.738	238.437
			430.167	206.715
			355.73	284.584
			481.412	308.084
			217.639	275.046
			287.021	301.516
			308.168	233.423
			340.814	214.362
			391.765	125.864
			240.468	124.099
			309.513	143.678
				132.264
				175.918
				332.411
				190.918
				292.693
				227.989
				440.993
				176.786
				191.114
				332.257
				379.973
				277.931
				410.406
				332.075
				251
				369.119
				218.9
				392.633
				205.329
				176.661
				215.245
				248.002
				145.499

## Sheet: 1G
Figure 1G		% of radial organized MTs at Synapse
% of cells						rescue lines
(%)			WT	KO#1	KO#2	KO#1+KIF21B	KO#2+KIF21B
		Experiment1	0.733871	0.508333	0.423913	0.72973	0.572327
		Experiment2	0.823009	0.520661	0.635417	0.808219	0.706897
		Experiment3	0.633028	0.4	0.393617	0.690909	0.620253
		Experiment4	0.851852	0.392857	0.291667
		# of cells anaylzed
						rescue lines
			WT	KO#1	KO#2	KO#1+KIF21B	KO#2+KIF21B
		Experiment1	124	120	92	111	159
		Experiment2	113	121	96	146	116
		Experiment3	109	120	94	110	79
		Experiment4	27	28	24
		Total:	373	389	306	367	354

## Sheet: 1J-K
Figure 1J and K		WT	KO#1	KO#2	KO#1+KIF21B-GFP	KO#2+KIF21B-GFP
Distance from coverslip		2	1.9	6.1	2.1	0.3
(μm)		2.2	1.5	1	0.9	2.5
		1.8	0.5	0.7	0.1	0.3
		0.7	1.3	0.8	4.3	0.5
		0.9	0.9	1.1	6.2	0.2
		1.6	2.2	1.4	0.5	0.3
		9.9	6.6	0.7	1.2	1.4
		1.3	0.6	6.6	3.3	1.6
		1.2	0.8	0.6	0.7	2.5
		1.7	0.8	1.4	1.1	1.7
		4	1	1.1	8.3	8.3
		5.6	1.1	1.3	1.6	1.8
		0.7	2.4	2	0.2	1.4
		9.4	2.6	0.8	2.8	1.4
		3.4	0.7	1.6	1	1.7
		2.3	1.1	7.8	1.4	3.9
		1	8.4	2.2	2.3	0.6
		3.7	2.7	6	1	1.4
		1.2	8.3	2.4	1	1
		4.5	5.1	2.6	1	1.7
		1.9	0.9	5.6	0.9	4.7
		2.3	0.8	0.8	5.1	0.8
		2.4	0.9	6.2	8.4	1.3
		1	1.4	2.9	1.3	0.7
		1.5	3.1	5.4	3.1	1.3
		0.6	1.2	1.9	2.8	1.1
		1	2.9	1.2	2.3	1.2
		1.2	1.3	6.6	4.5	2.4
		0.8	0.9	0.7	1.3	3.1
		2	5.4	2	2.1	2.1
		0.9	5.5	0.6	6.8	7.6
		1.4	1.1	3.1	2	7.7
		1.9	6.1	7.2	0.8	1.2
		0.7	1.4	2.2	1.2	3.6
		0.3	1.4	1.1	1.9	7.6
		1.1	1.1	4.9	0.7	4.9
		8.8	1	1.3	2.1	7.6
		1.3	2.1	8.8	1.4	1.1
		1.8	4.9	4.3	1.4	2
		1	1.9	0.7	0.8	4
		0.3	1.3	6.1	2.6	8
		1.2	2.1	8	7.9	0.8
		0.8	5.4	2.7	1.3	1.1
		0.7	5.8	8.9	1.7	0.3
		3.1	2.1	4.8	1.4	1
		1	0	2.2	0.9	4
		0.7	3	4.1	4.1	7.4
		1.8	6.2	5.5	2.2	4.8
		0.6	2.3	0.9	1	0.6
		0.9	2.9	1.6	2.2	3.9
		2.8	5.4	2.1	1.1	0.7
		0.3	2	2.6	1.6	2.3
		2.7	0.7	0.6	0.8	0.6
		1	7.1	3.9	0.6	5.7
		2.3	2.7	0.8	1	8.6
		1.5	1.7	0.9	0.8	2.7
		2.1	7.2	5.5	0.7	3.6
		1	2	1.4	0.7	1
		0.6	1	1.1	5.1	0.7
		1.5	1.3	1	1.2	0.8
		0.6	1	4	1.7	6.2
		0.6	7.4	4	0.8	4.5
		1.8	0.6	2.8	1	1.7
		0.9	2.4	2.2	1.6	7.3
		1.8	5.1	1.4	2.5	2
		2.6	2.1	0.2	0.8	3.6
		0.6	0.9	0.8	4.5	4.9
		1.4	1	1.4	0.8	1.9
		1.6	2.9	0.9	5.3	0.9
		7.2	1	5.1	5	1.4
		3.4	3.4	0.4	1.5	2
		9.6	2.6	0.9	0.6	0.8
		3.4	1.5	1.3	1	3.9
		0.7	1.7	2.4	3.3	6.4
		6.7	0.4	0.5	5.1	1.1
		1.1	1.6	1	0.5	1.9
		0.8	8.7	5.2	3.7	7.7
		6.6	1.5	3.8	0.5	1
		1.9	2.2	0.6	3.1	4.6
		7.8	2.3	0.6	0.5	0.9
		0.5	0.5	2.7	0.7	1
		0.6	5.9	2	4.5	2.3
		0.8	0.4	4.8	7.4	1.5
		2.3	0.9	0.3	2.1	0.7
		1.5	3.1	1.1	0.9	0.4
		2.9	1.3	6.9	1.3	1.7
		1.4	1.3	1.9	4.3	4
		2.6	6.4	6.5	1.3	1.9
		0.7	4.1	1.9	4.3	1.5
		0.8	0.2	1.2	3.8	1.4
		0.8	3.9	0.8	6.4	1.4
		3.1	2.1	3.3	2.6	1.9
		2.6	5.9	2.4	0.7	1.4
		0.4	0.9	4	4.9	0.9
		1	1.7	0.5	1.9	2.5
		1	0.9	3.3	0.4	0.6
		0.9	0.9	0.5	5.2	5.7
		2.6	4.3	8	3.3	1.5
		1.4	0.6	0.6	3.9	4.4
		1.6	0.8	6.6	1.5	1.6
		1.2	7.4	0.7	4.8	1.3
		2.2	0.8	0.5	3.7	1.1
		0.8	6.1	0.5	1.1	5.4
		0.7	1.1	3.7	0.6	1.9
		1.4	4.8	1.4	2.8	0.8
		1	0.8	0.9	0.8	1.3
		0.7	5.2	4.9	0.8	1.6
		7.7	0.9	0.7	4.1	2.8
		2.7	6.4	7.5	1.1	0.9
		0.6	0.5	8	7.4	1.7
		4.1	5.9	1.2	0.5	0.6
		0.6	5.2	5.6	4.2	1
		1.4	1.1	1.1	1.4	1.5
		1.1	0.9	4.8	3.6	0.8
		3.2	3.3	2.1	0.2	2.7
		1	5.4	6.5	2.3	2.1
		0.5	1.4	4.8	0.7	2.1
		0.8	1.1	0.9	2.5	1
		0.4	1.4	0.8	1.9	2.2
		0.7	0.9	6.8	2.2	1.4
		1.5	5.5	0.6	5.6	4.7
		3.8	1.3	0.5	3.5	1.3
		1.3	6.9	6.2	2	0.9
		1.1	0.9	2.9	1.2	0.9
		1	0.7	2.5	1.4	3.3
		1.4	3.8	1.4	2.5	0.6
		7.7	3.9	6.7	0.7	3.3
		2.4	5.9	4.7	2.1	6.9
		0.8	1.1	1	2.1	0.7
		1.4	6.2	7	4.6	0.4
		2	2.8	2.9	2.3	5.6
		1.2	3	5	3.9	0.6
		1.7	6.6	0.3	1.5	7.5
		1.8	1.6	3.2	1	4.1
		2.1	4.6	4.4	1.7	1.7
		2.2	6.7	6.3	2.4	5.9
		1.7	5.9	3.8	2.1	1.8
		1.9	0.8	2.1	3.8	1.5
		2.4	4.4	4.4	1.8	1.6
		2.1	1.8	0.7	2.3	5.2
		1.3	0.9	4.9	2.3	3.2
		0.8	1.2	4.6	2.5	7
		3.6	2.6	0.4	1.4	0.9
		1.3	2.3	6	0.6	2.1
		0.7	6.2	1.1	3.5	0.8
		1.3	0.5	1.5	5	0.6
		4.2	0.9	6.6	1.3	1.6
		2.4	8.2	2.2	1.1	6.6
		0.3	1.4	2.8	1.8	0.9
		0.4	0.4	6.3	2.8	4.1
		0.5	1.5	1.1	5.9	1.5
		1.6	4.8	4.8	0.9	1.1
		1.9	4.9	4.7	1	0.8
		0.7	0.3	5.2	1.1	4.6
		3.4	5	5.7	1	0.8
		1.6	0.4	1.6	1.2	0.9
		3.8	2.6	2.6	2.5	0.8
		0.6	1.9	0.5	3	1.2
		2.7	0.7	5.9	2.7	2.2
		2.2	2.4	0.7	1	5.5
		3.2	1.4	0.9	1.9	1.3
		3	2	0.4	2.7	3.1
		1.7	0.3	1.6	2	1.2
		2.5	0.9	0.9	1	0.5
		0.9	0.7	1.6	0.8	2.5
		1.4	1.5	2.2	0.9	2.3
		4.4	1.5	0.8	5.4	1.7
		1.8	1.1	2.7	0.8	1.5
		2.7	1.1	1.8	1.7	0.7
		2.8	4.4	1.6	0.6	0.9
		1.3	4.2	5.2	0.9	0.4
		0.3	0.5	6.6	1.7	1.8
		3.2	4.5	1.6	0.3	1
		2.9	3.7	2.2	0.7	0.8
		1.6	0.3	0.3	1.4	0.4
		0.4	3.2	0.2	0.6	1.2
		2.6	1.7	0.3	4.7	3.1
		3	3.8	0.2	1.3	1.4
		1.5	0.9	6	0.6	3.8
		1.4	1.9	1.9	0.8	3.4
		2.8	3.4	4.9	0.8	1.2
		6.4	0.7	7.9	0.4	1.9
		3	1.4	0.6	1.1	1.6
		1.3	2.6	2.5	0.9	0.9
		0.6	2	0.6	0.8	0.7
		4.5	6.2	4.1	0.8	1.3
		1.1	1.4	1.5	0.4	1.1
		0.1	1.4	5.2	1.7	1.5
		3.5	1.8	2.2	0.7	1.5
		0.3	1.2	0.5	7.7	7.9
		1.6	2.6	1.4	1.1	2.4
		4.8	5.7	0.5	2.3	1.5
		3.4	5.1	2.6	0.7	1.6
		9	0.4	4.2	1.9	0.5
		5	4.5	1.2	1.5	6.7
		0.9	0.9	1.6	4.7	6.6
		2.3	5.8	4.9	1.1	2.3
		0.7	1.1	0.9	0.3	0.8
		0.6	0.8	1.8	1.2	0.6
		1.7	1.5	6.4	0.9	0.2
		0.8	5.2	0.5	1	1.8
		0.6	1.5	7	1.1	0.9
		1.4	2.2	0.3	2.8	1.4
		2.4	0.2	0.4	2.3	1.6
		1.2	4.8	5.3	0.7	2.4
		6.8	3.9	0.8	2.4	0.1
		0.1	0.2	7.5	3	1.5
		1.6	9.1	0.3	0.8	0.7
		1.1	3.4	6.6	2.5	1.1
		2.5	1.5	1.3	0.9	1.2
		6	2.5	1.1	6.5	6
		1.4	0.5	2.1	0.4	2.1
		4.8	1.5	1.6	0.9	2.3
		0.6	0.6	7.4	0.8	0.6
		1.5	1.1	4	3.6	1
		1.5	6.8	3.1	0.9	1.4
		0.8	6.9	0.6		0.6
		1.5	2.2	0.9		3.3
		0.8	3.7	1.5		0.9
		2.9	2.8	6.7		0.8
		0.4	1	3.7		1.4
		2	1.7	2.2		2.2
		1.2	1.7	1.2		1.2
		1.5	8.2	1.3		1.1
		2.7	4.9	1.9		1.3
		4.4	1	6.4		0.5
		1.1	0.4	1.3		0.7
		1.5	7.5	1.9		10.4
		1.7	5.8	0.7		0.6
		3.4	9.1	6		1.1
		2.9	0.9	1.1		0.4
		1.1	1.2	4.2		0.7
		1.2	3.5	7.7		1.5
		1.1	0.8	1.2		2.6
		1.5	2.1	1.4		0.6
		0.8	1.8	3.2		1.3
		0.9	1.6	3.8		2.5
		1	3.8	5.6		0.4
		2.4	7.1	2.4		2.9
		0.8	5.3	0.8		0.4
		0.7	0.9	0.6		0.8
		1.2	6.1	1.8		2.3
		0.8	8.2	6.7		1.2
		3.6	8.3	7.1		1.8
		1.3	9.3			1.5
		0.8	1.6			1.6
		6.2	1			1.7
		1.5	9.6			1.3
		1.7	0.6			0.7
		1.3	1.5			6.6
		1.1	7.7			0.3
		2	0.8			1
		0.2	1.6			0.5
		0.6	1.3			2.4
		7.6	5			0.4
		1.1	1			0.8
		1.8	2.8			0.6
		2.1	8.2			5.4
		1.6	1.8			1.7
		0.6	8.1			0.6
		6.9	0.7			0.3
		0.8	8.6			0.4
		1.9	9.4			3.6
		0.7	1.9			0.3
		0.9	0.7			5.5
		1.6	1			2.6
		1.5	1.2			1.2
		1.5	8.2			1.4
		0.4	2.9			2.1
		1.2	1.9			1.3
		1.5	2.7			6.1
		1.2	3.5			0.6
		1.2	5.2			0.6
		1.4	3.8			0.6
		1.6	1			5.4
		1.2	2.3			1.4
		6.6	5			0.4
		1.1	3.5			0.5
		2	1			1.7
		1.5	4.2			5.1
		1.1	0.9			1.7
		2	2
		2.2	1.4
		3.4	2.3
		1
		0.8
		2
		0.6
		1.6
		1
		2.2
		0.8
		1.5
		4.5
		1.9
		1.5
		1
		1.5
		1.3
		0.9
		0.6
		1.3
		1.5
		0.8
		1
		0.1
		0.3
		0.6
		0.4
		1
		1
		0.5
		0.1
		0.3
		4.7
		1.1
		0.6
		0.5
