# Supplementary material for: Kinesin-4 KIF21B limits microtubule growth to allow rapid centrosome polarization in T cells
Source: eLife. 2020 Dec 21;9:e62876. doi: 10.7554/eLife.62876 (PMC7817182; doi:10.7554/eLife.62876)
Supplement: Figure 2—figure supplement 1—source data 1. [file elife-62876-fig2-figsupp1-data1.xlsx]

## Sheet: S2A
Figure S2A		WT	KO#1	KO#2
Total estimated length of all MTs (per cell)		14850.3	12997.3	16122.2
(µm)		10059.1	18195.7	23203.9
		11253.1	21832	16613.1
		12298.2	18023.5	26045.6
		6752.93	12599	26613.3
		9640.4	12027	24045.6
		10826.4	24941	20278.4
		18701.3	18903.3	9053.83
