# Supplementary material for: Kinesin-4 KIF21B limits microtubule growth to allow rapid centrosome polarization in T cells
Source: eLife. 2020 Dec 21;9:e62876. doi: 10.7554/eLife.62876 (PMC7817182; doi:10.7554/eLife.62876)
Supplement: Figure 2—source data 1. [file elife-62876-fig2-data1.xlsx]

## Sheet: 2C
Figure 2C		WT	KO#1	KO#2
% of non-radial MT intensity		33.9583	32.763	25.9133
(%)		17.37	21.6888	25.165
		12.7131	28.8765	28.1268
		20.7953	30.4385	29.6565
		22.8767	21.959	25.8661
		20.6338	26.9824	42.5324
		23.7945	32.1871	26.6121
		19.3654	37.8587	31.9827
		20.7828	20.9837	27.4868
		30.6249	35.131	38.8821
		21.9269	23.5085	27.5443
		20.4893	20.8558	27.7601
		14.2071	22.7684	29.9812
		16.3725	28.6547	30.5455
		16.3395	33.9017	23.2176
		20.5279	29.4411	38.7377
		38.7149	32.1831	32.3111
		28.4883	32.1382	29.4952
		25.596	25.6414	33.6949
		24.7929	33.5401	24.9429
		32.5426	30.0185	36.3197
		27.2515	38.501	37.0142
		22.6432	32.6995	30.4976
		30.3472	24.9316	28.3372
		29.7994	38.2397	30.758
		24.7564	32.0676	33.5184
		34.7696	31.4353	33.94
		30.7067	31.5339	31.4463
		19.9149	38.032	32.901
		31.7533	35.4716	36.6736
		24.9574	28.3145	31.2276
		34.7402	33.8822	33.1729
		27.9166	32.8742	34.5042
		26.6871	33.9336	38.7603
		30.9193	37.5259	34.6532
		26.3305	35.5444	31.5986
		33.5911	29.029	27.018
		25.7628	36.4844	32.3346
		24.968	34.6768	27.3377
		38.3588	40.2083	29.4763
		32.8786	32.7526	32.0433
		28.268	27.7778	24.436
		21.191	26.4793	39.0315
		27.6278	36.4163	30.783
			23.4661	25.8096
				27.5254
				40.9245
				36.5317
				28.9378
				30.1839
				33.2169
				35.0914

## Sheet: 2F
Figure 2F		WT	KO#1	KO#2
MT number		187	134	143
(# per cell)		184	127	95
		144	130	136
		152	137	125
		174	83	184
		174	156	181
		163	168	161
		230	167	115

## Sheet: 2G
Figure 2G		WT	KO#1	KO#2
MT length (per cell)		17.6474	21.5543	25.054
(µm)		12.1487	31.8385	54.2781
		17.3658	37.3197	27.1456
		17.9799	29.2352	46.3033
		8.62443	33.7321	32.1416
		12.3121	17.1324	29.522
		14.76	32.9907	27.9895
		18.0689	25.154	17.4953
