# Supplementary material for: Kinesin-4 KIF21B limits microtubule growth to allow rapid centrosome polarization in T cells
Source: eLife. 2020 Dec 21;9:e62876. doi: 10.7554/eLife.62876 (PMC7817182; doi:10.7554/eLife.62876)
Supplement: Figure 3—figure supplement 1—source data 1. [file elife-62876-fig3-figsupp1-data1.xlsx]

## Sheet: S3B
Figure S3B		Fitted Peak intensity:	monomericGFP		KIF21B-GFP	correction:
Fitted peak intensity (value per molecule)			Rawdata		Rawdata	0 nm correction	25 nm correction	50 nm correction	75 nm correction	100 nm correction
(au)			1172.92		2202.81	2202.81	2531.02	2908.13	3341.43	3839.3
			1624.16		1622.02	1622.02	1863.7	2141.38	2460.44	2827.04
			1469.82		1790.85	1790.85	2057.68	2364.27	2716.53	3121.29
			2014.63		1652.98	1652.98	1899.27	2182.25	2507.4	2881
			1758.02		1870.18	1870.18	2148.82	2468.99	2836.86	3259.55
			1957.11		2198.66	2198.66	2526.26	2902.66	3335.14	3832.07
			2289.24		1459.34	1459.34	1676.78	1926.61	2213.67	2543.5
			2191.09		1699.16	1699.16	1952.33	2243.22	2577.45	2961.49
			5295.33		1588.74	1588.74	1825.45	2097.44	2409.95	2769.02
			1134.15		1474.7	1474.7	1694.43	1946.89	2236.97	2570.27
			2456.23		2847.82	2847.82	3272.14	3759.67	4319.85	4963.49
			852.824		1297.98	1297.98	1491.37	1713.58	1968.9	2262.26
			2326.08		1881.91	1881.91	2162.3	2484.48	2854.66	3279.99
			911.864		1664.14	1664.14	1912.09	2196.99	2524.33	2900.44
			2770.54		1585.56	1585.56	1821.8	2093.24	2405.13	2763.48
			2842.38		1578.81	1578.81	1814.05	2084.34	2394.9	2751.73
			1287.9		1866.03	1866.03	2144.06	2463.52	2830.58	3252.32
			3255.48		2190.71	2190.71	2517.12	2892.16	3323.09	3818.21
			1047.92		1884.33	1884.33	2165.09	2487.68	2858.34	3284.22
			2730.3		1751.35	1751.35	2012.29	2312.11	2656.61	3052.44
			2700.42		2192.02	2192.02	2518.62	2893.89	3325.07	3820.49
			1552.66		1842.18	1842.18	2116.66	2432.03	2794.4	3210.75
			1481.26		2262.79	2262.79	2599.94	2987.32	3432.42	3943.83
			2798.44		1479.5	1479.5	1699.94	1953.22	2244.24	2578.63
			1102.63		2149.34	2149.34	2469.59	2837.55	3260.33	3746.11
			1555.73		3069.3	3069.3	3526.61	4052.07	4655.81	5349.51
			2915.71		2060.11	2060.11	2367.06	2719.74	3124.98	3590.59
			1874.15		2133.57	2133.57	2451.47	2816.73	3236.41	3718.63
			2479.72		3485.24	3485.24	4004.53	4601.19	5286.75	6074.45
			1409.11		2246.44	2246.44	2581.15	2965.74	3407.62	3915.34
			1863.06		2632.66	2632.66	3024.92	3475.62	3993.48	4588.49
			1766.16		3154.54	3154.54	3624.56	4164.6	4785.11	5498.08
			2354.79		2759.71	2759.71	3170.89	3643.34	4186.19	4809.92
			3120.43		2122.74	2122.74	2439.03	2802.43	3219.98	3699.75
			2972.32		1515.49	1515.49	1741.3	2000.74	2298.85	2641.37
			2403.55		2155.3	2155.3	2476.43	2845.41	3269.37	3756.5
			1956.37		2455.12	2455.12	2820.92	3241.23	3724.16	4279.05
			1973.14		2103.96	2103.96	2417.44	2777.63	3191.49	3667.01
			1822.16		3220.96	3220.96	3700.88	4252.29	4885.87	5613.85
			1754.08		2967.06	2967.06	3409.15	3917.1	4500.73	5171.32
			2225.12		2565.23	2565.23	2947.44	3386.6	3891.19	4470.96
			1816.39		3053.56	3053.56	3508.52	4031.28	4631.93	5322.07
			2557.16		1340.1	1340.1	1539.77	1769.19	2032.79	2335.67
			1238.95		1455.64	1455.64	1672.53	1921.73	2208.06	2537.05
			1524.13		3328.89	3328.89	3824.88	4394.77	5049.58	5801.95
			2651.95		2992.03	2992.03	3437.83	3950.06	4538.6	5214.84
			2240.11		2366.15	2366.15	2718.7	3123.78	3589.21	4123.99
			2192.07		1591.63	1591.63	1828.78	2101.26	2414.34	2774.07
			1698.58		1422.62	1422.62	1634.59	1878.14	2157.97	2479.5
			2316.72		1891.81	1891.81	2173.68	2497.56	2869.68	3297.25
			1404.15		1919.81	1919.81	2205.85	2534.52	2912.15	3346.05
			864.394		1800.84	1800.84	2069.16	2377.46	2731.7	3138.71
			4062.04		3293.15	3293.15	3783.82	4347.59	4995.37	5739.66
			796.177		3029.89	3029.89	3481.33	4000.04	4596.03	5280.82
			1929.61		2912.12	2912.12	3346.02	3844.56	4417.39	5075.56
			1608.18		2892.58	2892.58	3323.56	3818.76	4387.74	5041.5
			2699.33		2316.58	2316.58	2661.74	3058.33	3514.01	4037.58
			2106.16		1427.45	1427.45	1640.13	1884.51	2165.29	2487.91
			2347.55		2074.65	2074.65	2383.76	2738.94	3147.03	3615.92
			775.276		1868.76	1868.76	2147.2	2467.12	2834.72	3257.08
			1106.99		1781.33	1781.33	2046.75	2351.7	2702.1	3104.7
			1448.51		2214.82	2214.82	2544.82	2923.99	3359.66	3860.23
			1678.32		3074.49	3074.49	3532.58	4058.92	4663.68	5358.55
			1737.25		2312.34	2312.34	2656.87	3052.74	3507.58	4030.2
			1103.12		1898.44	1898.44	2181.3	2506.31	2879.74	3308.81
			2514.35		2786.56	2786.56	3201.75	3678.8	4226.93	4856.72
			1361.4		1816.45	1816.45	2087.09	2398.06	2755.37	3165.91
			2114.28		2064.21	2064.21	2371.77	2725.16	3131.19	3597.73
			2091.54		1648.77	1648.77	1894.43	2176.7	2501.02	2873.66
			899.994		2160.99	2160.99	2482.97	2852.92	3278	3766.41
			2046.05		2345.41	2345.41	2694.86	3096.39	3557.74	4087.83
			1913.09		1613.27	1613.27	1853.64	2129.82	2447.16	2811.78
			2327.32		2745.71	2745.71	3154.81	3624.86	4164.95	4785.52
			2206.1		1709.89	1709.89	1964.65	2257.38	2593.72	2980.18
			1126.04		2742.63	2742.63	3151.27	3620.8	4160.29	4780.16
			1820.72		1710.58	1710.58	1965.45	2258.29	2594.77	2981.38
			1763.06		2699.12	2699.12	3101.28	3563.36	4094.29	4704.32
			1543.11		2533.46	2533.46	2910.93	3344.65	3842.99	4415.59
			2955.03		2450.86	2450.86	2816.03	3235.61	3717.71	4271.63
			2353.6		2379.91	2379.91	2734.51	3141.94	3610.08	4147.97
			1368.43		2942.31	2942.31	3380.7	3884.41	4463.18	5128.17
			1367.32		2868.65	2868.65	3296.06	3787.17	4351.44	4999.79
			1880.56		2731.95	2731.95	3139	3606.7	4144.08	4761.53
			2526.51		4285.67	4285.67	4924.21	5657.9	6500.91	7469.52
			1829.04		3931.42	3931.42	4517.18	5190.23	5963.55	6852.1
			1884.74		2570.83	2570.83	2953.88	3394	3899.69	4480.73
			1203.39		3346.36	3346.36	3844.95	4417.83	5076.08	5832.39
			1412.17		3305.58	3305.58	3798.1	4364	5014.22	5761.32
			1153.01		2972.42	2972.42	3415.3	3924.17	4508.86	5180.66
			1384.83		3580.4	3580.4	4113.87	4726.82	5431.1	6240.32
			2159.14		3868.62	3868.62	4445.03	5107.32	5868.29	6742.65
			2351.42		3913.1	3913.1	4496.14	5166.05	5935.77	6820.18
			2288.77		3163.87	3163.87	3635.28	4176.92	4799.27	5514.35
			1508.67		3504	3504	4026.08	4625.95	5315.2	6107.15
			2735.59		4557.12	4557.12	5236.11	6016.27	6912.67	7942.64
			1728.59		4091.31	4091.31	4700.9	5401.32	6206.1	7130.79
			2766.37		4402.43	4402.43	5058.37	5812.05	6678.03	7673.03
			1095.47		4737.15	4737.15	5442.97	6253.95	7185.77	8256.42
			774.76		5743.14	5743.14	6598.84	7582.05	8711.74	10009.8
			1609.1		4731.48	4731.48	5436.45	6246.46	7177.16	8246.53
			2231.02		5630.02	5630.02	6468.87	7432.71	8540.16	9812.61
			1586.5		5318.92	5318.92	6111.42	7022	8068.25	9270.39
			5430.24		4992.62	4992.62	5736.5	6591.21	7573.28	8701.67
			1083.64		4723.37	4723.37	5427.13	6235.76	7164.86	8232.4
			1359		5328.59	5328.59	6122.53	7034.76	8082.92	9287.24
			1427.56		4683.2	4683.2	5380.97	6182.72	7103.92	8162.38
			3367.41		4199.78	4199.78	4825.53	5544.51	6370.63	7319.83
			1093.76		4057.19	4057.19	4661.7	5356.28	6154.34	7071.32
			2670.85		4261.58	4261.58	4896.54	5626.11	6464.38	7427.55
			1409.28		3945.15	3945.15	4532.96	5208.35	5984.38	6876.03
			1431.01		2784.39	2784.39	3199.25	3675.93	4223.63	4852.93
			1618.63		4674	4674	5370.41	6170.58	7089.97	8146.35
			4789.79		4607.43	4607.43	5293.92	6082.7	6989	8030.33
			3540.54		4622.97	4622.97	5311.77	6103.21	7012.56	8057.41
			2119.94		4667.56	4667.56	5363	6162.07	7080.2	8135.12
			1431.44		3171.29	3171.29	3643.8	4186.72	4810.52	5527.27
			2042.74		3878.97	3878.97	4456.93	5120.99	5884	6760.7
			1728.7		3599.45	3599.45	4135.75	4751.96	5459.99	6273.51
			2578.5		4058.21	4058.21	4662.87	5357.62	6155.89	7073.1
			1425.65		2465.35	2465.35	2832.68	3254.74	3739.68	4296.88
			2264.04		2955.88	2955.88	3396.29	3902.33	4483.76	5151.82
			2372.08		1905.8	1905.8	2189.75	2516.02	2890.9	3321.63
			653.69		3131.67	3131.67	3598.28	4134.41	4750.42	5458.22
			1791.82		2097.73	2097.73	2410.28	2769.41	3182.04	3656.15
			2592.37		2339.77	2339.77	2688.39	3088.95	3549.19	4078.01
			1554.88		1640.81	1640.81	1885.29	2166.19	2488.94	2859.79
			1948.94		1947.67	1947.67	2237.87	2571.3	2954.42	3394.62
			1210.31		3228.69	3228.69	3709.76	4262.5	4897.59	5627.32
			1026.67		1643.46	1643.46	1888.33	2169.69	2492.96	2864.4
			2291.24		2442.55	2442.55	2806.48	3224.64	3705.1	4257.14
			3496.43		1606.65	1606.65	1846.04	2121.09	2437.13	2800.25
			1517.48		2165.73	2165.73	2488.42	2859.19	3285.2	3774.68
			997.56		1746.34	1746.34	2006.54	2305.5	2649.01	3043.71
			3137.77		2393.76	2393.76	2750.42	3160.22	3631.08	4172.1
			1192.68		1612.76	1612.76	1853.05	2129.15	2446.38	2810.89
			2133.39		2362.17	2362.17	2714.13	3118.53	3583.18	4117.06
			2034.76		1458.37	1458.37	1675.67	1925.34	2212.2	2541.81
			2209.41		2370.76	2370.76	2723.99	3129.86	3596.19	4132.01
			4854.8		2734.56	2734.56	3142	3610.15	4148.05	4766.1
			4835.59		2595.32	2595.32	2982.01	3426.32	3936.83	4523.41
			1517.11		1997.84	1997.84	2295.52	2637.54	3030.52	3482.06
			1782.25		2043.42	2043.42	2347.88	2697.7	3099.65	3561.49
			2523.45		2035.93	2035.93	2339.28	2687.82	3088.3	3548.45
			1411.47		2630.71	2630.71	3022.68	3473.05	3990.52	4585.09
			2195.25		1369.19	1369.19	1573.2	1807.6	2076.92	2386.37
			1838.38		2836.01	2836.01	3258.56	3744.08	4301.93	4942.9
			2152.49		1884.07	1884.07	2164.79	2487.33	2857.94	3283.76
			1693.84		1522.57	1522.57	1749.43	2010.09	2309.58	2653.7
			5653.46		1480.03	1480.03	1700.55	1953.92	2245.05	2579.56
			1836.91		1775.05	1775.05	2039.53	2343.41	2692.57	3093.75
			2533.05		2237.3	2237.3	2570.66	2953.67	3393.76	3899.42
			898.865		2203.43	2203.43	2531.74	2908.96	3342.38	3840.38
			1506.43		1880.05	1880.05	2160.17	2482.02	2851.84	3276.75
			2928.76		1808.52	1808.52	2077.98	2387.6	2743.34	3152.09
			2198.53		2012.52	2012.52	2312.37	2656.91	3052.78	3507.63
			1720.57		2140.27	2140.27	2459.16	2825.57	3246.57	3730.29
			1154.56		1882.05	1882.05	2162.47	2484.67	2854.88	3280.25
			1972.24		2757.77	2757.77	3168.66	3640.78	4183.25	4806.53
			804.534		2180.62	2180.62	2505.52	2878.84	3307.77	3800.62
			1721.73		2147.42	2147.42	2467.38	2835.01	3257.42	3742.76
			1864.98		3007.86	3007.86	3456.01	3970.95	4562.61	5242.42
			1147.38		2077.67	2077.67	2387.23	2742.92	3151.61	3621.19
			1656.17		3008.14	3008.14	3456.35	3971.33	4563.04	5242.92
			2463.22		2804.87	2804.87	3222.79	3702.97	4254.7	4888.64
			949.473		2013.88	2013.88	2313.94	2658.71	3054.85	3510.02
			1645.89		3283.04	3283.04	3772.2	4334.25	4980.03	5722.04
			1493.76		2412.68	2412.68	2772.16	3185.2	3659.79	4205.08
			1018.18		1602.94	1602.94	1841.77	2116.19	2431.5	2793.78
			2190.64		2179.63	2179.63	2504.39	2877.54	3306.28	3798.9
			2265.87		1644.32	1644.32	1889.32	2170.82	2494.27	2865.91
			2137.89		1893.62	1893.62	2175.76	2499.94	2872.42	3300.4
			1222.95		1603.3	1603.3	1842.19	2116.67	2432.05	2794.41
			2235.63		1806.4	1806.4	2075.55	2384.8	2740.13	3148.4
			1383.89		2921.17	2921.17	3356.42	3856.51	4431.12	5091.34
			1774.73		2255.33	2255.33	2591.37	2977.47	3421.11	3930.84
			1681.05		2206.87	2206.87	2535.68	2913.49	3347.59	3846.37
			1784.71		3228.44	3228.44	3709.47	4262.17	4897.22	5626.88
			852.698		2394.75	2394.75	2751.56	3161.54	3632.59	4173.84
			2485.08		2606.03	2606.03	2994.32	3440.46	3953.07	4542.07
			2941.79		2347.17	2347.17	2696.9	3098.72	3560.42	4090.91
			1941.41		1822.77	1822.77	2094.36	2406.41	2764.96	3176.93
			1085.28		3756.01	3756.01	4315.65	4958.66	5697.48	6546.39
			1923.38		2763.95	2763.95	3175.77	3648.95	4192.63	4817.32
			1737.22		3539.37	3539.37	4066.73	4672.65	5368.86	6168.8
			2128.52		2038.82	2038.82	2342.6	2691.64	3092.68	3553.48
			2034.14		1590.35	1590.35	1827.3	2099.56	2412.39	2771.83
			1163.95		1415.09	1415.09	1625.93	1868.19	2146.55	2466.38
			3825.09		1968.98	1968.98	2262.35	2599.43	2986.74	3431.75
			1284.73		1935.56	1935.56	2223.95	2555.31	2936.04	3373.5
			1293.17		2476.23	2476.23	2845.17	3269.1	3756.18	4315.84
			1303.45		2158.33	2158.33	2479.91	2849.41	3273.96	3761.77
			1032.53		1586.57	1586.57	1822.97	2094.58	2406.67	2765.25
			1543.19		1928.78	1928.78	2216.16	2546.36	2925.75	3361.68
			1193.91		1356.22	1356.22	1558.29	1790.47	2057.25	2363.77
			2852.85		2138.9	2138.9	2457.59	2823.77	3244.5	3727.92
			1803.72		3012.26	3012.26	3461.07	3976.76	4569.28	5250.09
			1996.41		2168.41	2168.41	2491.49	2862.72	3289.25	3779.34
			1574.38		2750.1	2750.1	3159.86	3630.66	4171.62	4793.18
			2447.55		3668.53	3668.53	4215.13	4843.17	5564.79	6393.92
			1285.59		1687.02	1687.02	1938.39	2227.2	2559.04	2940.33
			2216.92		2630.94	2630.94	3022.94	3473.34	3990.86	4585.48
			1979.98		2822.93	2822.93	3243.54	3726.82	4282.1	4920.12
			1978.72		2422.92	2422.92	2783.93	3198.73	3675.33	4222.94
			1463.71		2337.66	2337.66	2685.96	3086.16	3545.98	4074.32
			2100.57		2447.63	2447.63	2812.32	3231.34	3712.8	4265.99
			1379.37		2913.96	2913.96	3348.13	3846.99	4420.17	5078.76
			2500.35		2405.26	2405.26	2763.63	3175.4	3648.53	4192.14
			1766.67		2829.42	2829.42	3250.99	3735.38	4291.94	4931.42
			2332.11		1953.95	1953.95	2245.08	2579.59	2963.94	3405.56
			2443.87		2268.42	2268.42	2606.41	2994.75	3440.96	3953.65
			1258.56		2824.77	2824.77	3245.65	3729.24	4284.89	4923.32
			3032.38		2513.2	2513.2	2887.66	3317.91	3812.27	4380.28
			2073.25		2352.19	2352.19	2702.66	3105.35	3568.03	4099.66
			1386.64		1864.98	1864.98	2142.85	2462.13	2828.97	3250.48
			2613.46		2863.2	2863.2	3289.8	3779.97	4343.17	4990.29
			1683.26		2959.11	2959.11	3400	3906.59	4488.66	5157.45
			1934.38		2672.82	2672.82	3071.06	3528.64	4054.39	4658.48
			1119.67		2816.96	2816.96	3236.68	3718.93	4273.04	4909.71
			1125.14		2119.47	2119.47	2435.27	2798.11	3215.02	3694.05
			1769.31		3397.23	3397.23	3903.4	4485	5153.24	5921.06
			1022.54		3144.74	3144.74	3613.29	4151.66	4770.24	5480.99
			2342.23		2695.98	2695.98	3097.67	3559.21	4089.52	4698.84
			1896.94		2273.04	2273.04	2611.72	3000.85	3447.97	3961.71
			1725.27		2835.82	2835.82	3258.35	3743.83	4301.65	4942.58
			1694.62		2320.54	2320.54	2666.3	3063.56	3520.02	4044.49
			1891		1584.76	1584.76	1820.88	2092.19	2403.92	2762.09
			928.946		2589.29	2589.29	2975.09	3418.36	3927.69	4512.9
			2203.27		2392.38	2392.38	2748.84	3158.41	3629	4169.71
			1155.74		3817.09	3817.09	4385.83	5039.3	5790.14	6652.85
			1657.07		3539.45	3539.45	4066.82	4672.76	5368.98	6168.94
			879.464		1949.52	1949.52	2239.99	2573.75	2957.22	3397.84
			1439.9		2480.68	2480.68	2850.29	3274.97	3762.93	4323.6
			1585.12		1865.79	1865.79	2143.78	2463.2	2830.21	3251.9
			3915		2836.02	2836.02	3258.57	3744.09	4301.95	4942.92
			2298.88		2710.09	2710.09	3113.89	3577.85	4110.93	4723.45
			1054.13		2694.25	2694.25	3095.68	3556.93	4086.9	4695.83
			1957.43		1995.42	1995.42	2292.73	2634.34	3026.85	3477.84
			3202.47		1958.41	1958.41	2250.21	2585.48	2970.71	3413.33
			3888.83		2813.6	2813.6	3232.82	3714.49	4267.94	4903.85
			1480.24		1483.05	1483.05	1704.01	1957.91	2249.63	2584.81
			2021.92		2063.98	2063.98	2371.5	2724.85	3130.84	3597.33
			2163.18		2586.57	2586.57	2971.96	3414.78	3923.57	4508.16
			2127.04		2464.41	2464.41	2831.6	3253.5	3738.25	4295.24
			1141.89		2884.09	2884.09	3313.81	3807.56	4374.87	5026.71
			2539.41		2529.21	2529.21	2906.05	3339.04	3836.55	4408.18
			1260.86		2384.03	2384.03	2739.24	3147.38	3616.33	4155.15
			4074.31		2907.91	2907.91	3341.18	3839	4411	5068.22
			1414.81		2507.68	2507.68	2881.31	3310.62	3803.89	4370.66
			1945		3495.48	3495.48	4016.29	4614.71	5302.28	6092.3
			1856.69		1757.11	1757.11	2018.92	2319.73	2665.36	3062.49
			1371.59		2365.61	2365.61	2718.08	3123.06	3588.39	4123.05
			1971.86		2710.18	2710.18	3113.99	3577.96	4111.07	4723.6
			1158.48		4621.53	4621.53	5310.13	6101.32	7010.39	8054.91
			1369		2481.18	2481.18	2850.86	3275.63	3763.69	4324.46
			1214.93		1765.71	1765.71	2028.79	2331.08	2678.4	3077.47
			1442.21		1900.21	1900.21	2183.33	2508.64	2882.42	3311.89
			1670.3		2733.28	2733.28	3140.52	3608.45	4146.1	4763.85
			1707.06		2648.6	2648.6	3043.24	3496.67	4017.66	4616.28
			2954.9		2325.41	2325.41	2671.88	3069.98	3527.4	4052.97
			1584.66		2653.52	2653.52	3048.89	3503.16	4025.12	4624.85
			3061.97		1758.71	1758.71	2020.75	2321.83	2667.78	3065.26
			1277.16		2407.46	2407.46	2766.16	3178.31	3651.87	4195.99
			1751.52		2637.52	2637.52	3030.5	3482.04	4000.85	4596.96
			1611.07		2480.42	2480.42	2849.99	3274.63	3762.54	4323.15
			2684.22		3144.34	3144.34	3612.84	4151.14	4769.64	5480.3
			2106.58		1634.53	1634.53	1878.06	2157.89	2479.41	2848.83
			1143.07		1565.69	1565.69	1798.97	2067.02	2374.99	2728.86
			1300.58		1297.85	1297.85	1491.22	1713.41	1968.7	2262.03
			2022.12		2915.45	2915.45	3349.84	3848.96	4422.44	5081.37
			2075.95		1853.89	1853.89	2130.11	2447.49	2812.16	3231.16
			1247.6		1399.13	1399.13	1607.6	1847.12	2122.34	2438.56
			1300.64		2905.68	2905.68	3338.62	3836.06	4407.62	5064.33
			1902.75		1685.42	1685.42	1936.54	2225.08	2556.61	2937.53
			1638.63		3154.73	3154.73	3624.77	4164.85	4785.39	5498.4
			1735.06		2649.85	2649.85	3044.67	3498.32	4019.55	4618.45
			1629.39		1766.04	1766.04	2029.17	2331.51	2678.89	3078.04
			1461.19		2131.1	2131.1	2448.62	2813.46	3232.65	3714.31
			2146.61		2175.94	2175.94	2500.14	2872.66	3300.67	3792.46
			2911.87		1935.48	1935.48	2223.86	2555.21	2935.93	3373.37
			1066.45		2584.87	2584.87	2970.01	3412.53	3920.99	4505.2
			1985.57		2433.18	2433.18	2795.72	3212.27	3690.89	4240.82
			1749.8		1753.31	1753.31	2014.55	2314.71	2659.59	3055.86
			2056.55		2823.72	2823.72	3244.44	3727.85	4283.29	4921.48
			1298.89		1825.54	1825.54	2097.54	2410.07	2769.16	3181.75
			1636.55		2031.43	2031.43	2334.11	2681.88	3081.47	3540.6
			1856.53		3019.54	3019.54	3469.44	3986.37	4580.32	5262.78
			1528.23		1888.16	1888.16	2169.49	2492.73	2864.14	3290.89
			910.994		2877.22	2877.22	3305.92	3798.49	4364.45	5014.74
			1428.49		2685.58	2685.58	3085.72	3545.48	4073.74	4680.72
			1414.32		1756.17	1756.17	2017.84	2318.49	2663.93	3060.85
			1682.69		2235.17	2235.17	2568.2	2950.85	3390.52	3895.7
			3077.35		2859.51	2859.51	3285.57	3775.11	4337.59	4983.87
			1510.46		2935.74	2935.74	3373.15	3875.74	4453.21	5116.72
			1836.04		2411.59	2411.59	2770.91	3183.77	3658.14	4203.19
			1544.35		3273.4	3273.4	3761.13	4321.52	4965.41	5705.24
			1499.58		1970.87	1970.87	2264.53	2601.93	2989.61	3435.05
			943.01		2665.04	2665.04	3062.12	3518.37	4042.59	4644.92
			1550.31		2714.8	2714.8	3119.29	3584.06	4118.07	4731.64
			1347.83		3110.01	3110.01	3573.39	4105.82	4717.57	5420.47
			1229.72		2209.48	2209.48	2538.69	2916.94	3351.56	3850.93
			2331.54		1477.73	1477.73	1697.9	1950.88	2241.56	2575.54
			1488.13		1901.19	1901.19	2184.46	2509.93	2883.9	3313.59
			2286.64		3201.31	3201.31	3678.29	4226.34	4856.05	5579.59
			1401.07		2995.42	2995.42	3441.73	3954.53	4543.74	5220.74
			2795.91		3532.5	3532.5	4058.83	4663.58	5358.44	6156.83
			721.772		2756.76	2756.76	3167.51	3639.46	4181.72	4804.78
			1211.91		4231.1	4231.1	4861.52	5585.87	6418.14	7374.43
			1465.58		2646.34	2646.34	3040.63	3493.67	4014.22	4612.32
			2007.33		2248.16	2248.16	2583.13	2968.01	3410.23	3918.34
			1527.77		2792.26	2792.26	3208.29	3686.32	4235.57	4866.65
			1686.87		2876.56	2876.56	3305.15	3797.61	4363.44	5013.57
			2091.55		2482.44	2482.44	2852.32	3277.3	3765.61	4326.67
			2107.63		2972.02	2972.02	3414.84	3923.64	4508.24	5179.95
			1846.41		1979.62	1979.62	2274.57	2613.48	3002.87	3450.29
			1406.83		2649.98	2649.98	3044.82	3498.49	4019.75	4618.68
			1642.7		1562.45	1562.45	1795.25	2062.74	2370.08	2723.21
			2909.73		1715.34	1715.34	1970.92	2264.58	2602	2989.69
			1441.43		2323.72	2323.72	2669.95	3067.76	3524.85	4050.04
			1606.85		2216.66	2216.66	2546.93	2926.42	3362.44	3863.44
			1784.93		1974.61	1974.61	2268.82	2606.86	2995.27	3441.56
			1828.48		2884.51	2884.51	3314.29	3808.11	4375.5	5027.44
			1898.03		3377.28	3377.28	3880.48	4458.66	5122.98	5886.29
			1674.42		3940.33	3940.33	4527.42	5201.99	5977.07	6867.64
			1085.63		3621.22	3621.22	4160.76	4780.7	5493.01	6311.45
			1400.59		3352.38	3352.38	3851.87	4425.78	5085.21	5842.89
			2764.75		3639.09	3639.09	4181.3	4804.3	5520.13	6342.61
			1520.54		2633.64	2633.64	3026.04	3476.91	3994.96	4590.19
			1166.48		3833.65	3833.65	4404.85	5061.16	5815.25	6681.7
			4001.12		3030.42	3030.42	3481.95	4000.74	4596.84	5281.75
			1174.14		3103.3	3103.3	3565.69	4096.96	4707.39	5408.78
			5380.82		3959.34	3959.34	4549.27	5227.1	6005.92	6900.78
			1650.67		4311.83	4311.83	4954.28	5692.45	6540.6	7515.13
			1184.25		3328	3328	3823.86	4393.6	5048.23	5800.4
			1759.24		1469.3	1469.3	1688.22	1939.76	2228.77	2560.85
			2257.26		2944.51	2944.51	3383.23	3887.31	4466.51	5132
			2752.63		3256.23	3256.23	3741.4	4298.85	4939.37	5675.32
			1945.24		3636.85	3636.85	4178.73	4801.34	5516.73	6338.7
			1067.15		3084.88	3084.88	3544.51	4072.63	4679.44	5376.66
			2061.36		3231.02	3231.02	3712.43	4265.56	4901.12	5631.37
			1544.74		1880.06	1880.06	2160.18	2482.04	2851.85	3276.77
			1338.68		1785.12	1785.12	2051.1	2356.7	2707.85	3111.3
			887.684		2819.44	2819.44	3239.53	3722.2	4276.8	4914.03
			2033.13		2881.61	2881.61	3310.96	3804.29	4371.11	5022.39
			3333.15		1715.47	1715.47	1971.07	2264.76	2602.2	2989.91
			1306.19		2279.03	2279.03	2618.59	3008.76	3457.05	3972.14
			1507.25		2550.92	2550.92	2931	3367.71	3869.48	4446.02
			1601.87		2367.16	2367.16	2719.86	3125.11	3590.74	4125.75
			2194.13		2885.96	2885.96	3315.96	3810.03	4377.71	5029.97
			1206.61		2227.37	2227.37	2559.24	2940.56	3378.7	3882.11
			1833.38		2137.29	2137.29	2455.74	2821.64	3242.05	3725.11
			1486.06		2076.78	2076.78	2386.21	2741.75	3150.26	3619.64
			1568.43		2561.68	2561.68	2943.36	3381.91	3885.81	4464.78
			3708.71		1806.29	1806.29	2075.42	2384.65	2739.96	3148.2
			2682.27		2270.93	2270.93	2609.29	2998.07	3444.77	3958.03
			2012.43		1363.44	1363.44	1566.58	1800	2068.19	2376.34
			2142.13		3794.84	3794.84	4360.26	5009.92	5756.38	6614.06
			3700.09		1602.9	1602.9	1841.73	2116.14	2431.44	2793.71
			1129.14		1634.96	1634.96	1878.56	2158.46	2480.07	2849.59
			2792.23		3274.33	3274.33	3762.19	4322.74	4966.82	5706.86
			2008.79		3344.63	3344.63	3842.97	4415.56	5073.46	5829.39
			2546.7		3653.25	3653.25	4197.57	4822.99	5541.6	6367.28
			2289.07		6432.9	6432.9	7391.38	8492.67	9758.05	11212
			2175.89		3929.25	3929.25	4514.69	5187.36	5960.26	6848.32
			1646.65		3710.67	3710.67	4263.55	4898.8	5628.71	6467.36
			1475.42		5254.31	5254.31	6037.18	6936.7	7970.24	9157.78
			2235.8		3235.8	3235.8	3717.92	4271.87	4908.37	5639.7
			1520.43		1520.62	1520.62	1747.19	2007.51	2306.63	2650.31
			2966.5		2631.05	2631.05	3023.07	3473.49	3991.03	4585.68
			1547.69		3472.83	3472.83	3990.27	4584.81	5267.93	6052.83
			1108.85		2523.38	2523.38	2899.35	3331.34	3827.7	4398.01
			2369		2221.55	2221.55	2552.55	2932.88	3369.86	3871.96
			2035.86		3505.55	3505.55	4027.87	4628.01	5317.56	6109.86
			2071.53		2321.62	2321.62	2667.53	3064.99	3521.66	4046.37
			2177.17		3733.09	3733.09	4289.31	4928.4	5662.71	6506.44
			1934.89		3470.34	3470.34	3987.4	4581.51	5264.14	6048.48
			1319.61		1469.06	1469.06	1687.94	1939.44	2228.41	2560.43
			1514.46		2996.68	2996.68	3443.18	3956.2	4545.66	5222.95
			1771.52		3082.44	3082.44	3541.71	4069.42	4675.75	5372.41
			1854.41		5530.52	5530.52	6354.55	7301.36	8389.23	9639.2
			1695.57		3154.53	3154.53	3624.54	4164.58	4785.09	5498.05
			1828.07		4914.23	4914.23	5646.43	6487.73	7454.38	8565.06
			4351.35		3210.48	3210.48	3688.83	4238.45	4869.96	5595.57
			1624.38		3766	3766	4327.12	4971.84	5712.63	6563.79
			1928.88		3171.01	3171.01	3643.47	4186.34	4810.09	5526.77
			2906.62		3217.17	3217.17	3696.52	4247.28	4880.11	5607.23
			3178.14		3128.65	3128.65	3594.81	4130.42	4745.84	5452.96
			2039.45		4474.21	4474.21	5140.85	5906.82	6786.91	7798.14
			1461.52		3769.31	3769.31	4330.92	4976.22	5717.65	6569.56
			1978.05		3924.42	3924.42	4509.15	5180.99	5952.94	6839.91
			1173.01		3236.1	3236.1	3718.26	4272.27	4908.83	5640.22
			1564.83		1796.86	1796.86	2064.58	2372.2	2725.65	3131.76
			2538.18		2872.81	2872.81	3300.85	3792.66	4357.75	5007.04
			1807.58		3575.59	3575.59	4108.34	4720.47	5423.8	6231.93
			1646.62		3403.33	3403.33	3910.42	4493.06	5162.51	5931.7
			4214.65		2615.59	2615.59	3005.31	3453.09	3967.58	4558.74
			2506.95		1887.6	1887.6	2168.85	2492	2863.3	3289.92
			1803.42		2099.14	2099.14	2411.91	2771.27	3184.18	3658.62
			1626.44		2592.22	2592.22	2978.45	3422.23	3932.13	4518
			1418.42		2293.21	2293.21	2634.89	3027.48	3478.57	3996.86
			1775.01		1639.07	1639.07	1883.29	2163.89	2486.3	2856.75
			2944.75		3201.81	3201.81	3678.87	4227.01	4856.82	5580.47
			973.651		1712.26	1712.26	1967.38	2260.52	2597.33	2984.32
			2280.43		3664.61	3664.61	4210.62	4837.99	5558.83	6387.08
			4193.15		5463.73	5463.73	6277.8	7213.17	8287.91	9522.78
			2371.14		5091.23	5091.23	5849.8	6721.4	7722.87	8873.54
			1389.45		3617.89	3617.89	4156.94	4776.31	5487.96	6305.65
			1989.39		2613.71	2613.71	3003.14	3450.6	3964.72	4555.45
			2017.51		3083.21	3083.21	3542.6	4070.44	4676.92	5373.76
			1223.77		3094.62	3094.62	3555.71	4085.49	4694.22	5393.64
			1395.45		2066.02	2066.02	2373.85	2727.55	3133.94	3600.89
			2143.11		4623.81	4623.81	5312.74	6104.32	7013.84	8058.87
			2647.16		2228.66	2228.66	2560.73	2942.27	3380.65	3884.36
			1101.21		4058.85	4058.85	4663.6	5358.46	6156.85	7074.2
			1669.54		2900.48	2900.48	3332.64	3829.2	4399.73	5055.28
			1587.6		1871.63	1871.63	2150.5	2470.92	2839.07	3262.09
			3137.84		1686.81	1686.81	1938.13	2226.91	2558.71	2939.95
			1120.47		1317.96	1317.96	1514.34	1739.97	1999.21	2297.09
			1552.87		1410.52	1410.52	1620.68	1862.16	2139.61	2458.41
			2661.79		2426.43	2426.43	2787.96	3203.36	3680.65	4229.05
			1415.1		3386.42	3386.42	3890.99	4470.73	5136.85	5902.23
			1998.92		2501.97	2501.97	2874.75	3303.08	3795.23	4360.7
			1502.95		2430.86	2430.86	2793.04	3209.2	3687.36	4236.76
			1933.67		2688.86	2688.86	3089.49	3549.81	4078.72	4686.44
			878.983		1952.04	1952.04	2242.88	2577.06	2961.04	3402.22
			1848.43		2938.44	2938.44	3376.26	3879.31	4457.31	5121.44
			1562.61		3126.36	3126.36	3592.18	4127.4	4742.37	5448.96
			2602.53		2491.13	2491.13	2862.29	3288.77	3778.78	4341.8
			2449.18		3593.45	3593.45	4128.86	4744.05	5450.9	6263.06
			1963.5		2151.54	2151.54	2472.11	2840.44	3263.66	3749.93
			828.193		4441.13	4441.13	5102.85	5863.15	6736.74	7740.49
			2438.7		3682.83	3682.83	4231.56	4862.05	5586.48	6418.85
			1609.58		4379.53	4379.53	5032.06	5781.82	6643.29	7633.11
			2614.99		2586.56	2586.56	2971.94	3414.75	3923.54	4508.13
			1462.02		2147.92	2147.92	2467.95	2835.67	3258.17	3743.63
			4212.12		2747.41	2747.41	3156.77	3627.11	4167.54	4788.49
			1387.93		2825.09	2825.09	3246.02	3729.66	4285.37	4923.88
			2554.02		2187.98	2187.98	2513.99	2888.56	3318.95	3813.46
			2313.52		2844.88	2844.88	3268.75	3755.78	4315.38	4958.36
			1500.34		1697.09	1697.09	1949.95	2240.48	2574.3	2957.87
			1908.35		2422.61	2422.61	2783.57	3198.31	3674.85	4222.39
			2691.51		2639.27	2639.27	3032.51	3484.34	4003.5	4600
			1627.21		1841.3	1841.3	2115.65	2430.87	2793.07	3209.22
			973.139		2213.38	2213.38	2543.16	2922.08	3357.46	3857.71
			1685.75		1517.8	1517.8	1743.95	2003.79	2302.35	2645.39
			1515.81		2451.55	2451.55	2816.83	3236.52	3718.75	4272.83
			1701.12		2791.78	2791.78	3207.75	3685.69	4234.85	4865.82
			1096.02		1994.26	1994.26	2291.4	2632.81	3025.08	3475.81
			1445.33		1941.41	1941.41	2230.67	2563.04	2944.92	3383.7
			2189.61		2872.1	2872.1	3300.03	3791.72	4356.67	5005.8
			2312.84		2384.37	2384.37	2739.63	3147.82	3616.84	4155.74
			3326.04		1819.73	1819.73	2090.86	2402.39	2760.34	3171.62
			1378.3		2417.46	2417.46	2777.65	3191.52	3667.04	4213.42
			1232.82		1973.11	1973.11	2267.1	2604.89	2993.01	3438.96
			1487.77		2453.81	2453.81	2819.42	3239.5	3722.17	4276.76
			1605.14		1820.89	1820.89	2092.2	2403.93	2762.1	3173.65
			3201		1545.22	1545.22	1775.45	2039.99	2343.94	2693.18
			2108.8		1813.02	1813.02	2083.16	2393.54	2750.17	3159.94
			1756.07		1871.91	1871.91	2150.82	2471.28	2839.5	3262.57
			1110.04		1843.85	1843.85	2118.58	2434.24	2796.93	3213.66
			4415.97		1821.36	1821.36	2092.73	2404.54	2762.81	3174.46
			1823.86		2923.88	2923.88	3359.53	3860.09	4435.23	5096.06
			2496.11		7328.55	7328.55	8420.48	9675.1	11116.7	12773
			2180.87		8073.43	8073.43	9276.34	10658.5	12246.6	14071.2
			2183.74		7294.02	7294.02	8380.81	9629.52	11064.3	12712.8
			2560.19		6961.24	6961.24	7998.44	9190.18	10559.5	12132.8
			982.302		6653.08	6653.08	7644.37	8783.35	10092	11595.7
			1602.64		8184.23	8184.23	9403.65	10804.8	12414.6	14264.4
			2398.91		7137.63	7137.63	8201.12	9423.05	10827.1	12440.2
			2649.15		7415.89	7415.89	8520.83	9790.4	11249.1	12925.2
			1272.78		4038.21	4038.21	4639.88	5331.21	6125.54	7038.22
			1468.6		4419.3	4419.3	5077.76	5834.33	6703.62	7702.44
			2221.58		4985.71	4985.71	5728.56	6582.09	7562.8	8689.63
			1487.87		6932.96	6932.96	7965.95	9152.85	10516.6	12083.5
			2377.09		6055.08	6055.08	6957.27	7993.88	9184.94	10553.5
			1191.52		5776.78	5776.78	6637.49	7626.46	8762.77	10068.4
			1834.37		4723.56	4723.56	5427.35	6236.01	7165.15	8232.73
			1492.13		4957.93	4957.93	5696.64	6545.42	7520.67	8641.22
			2532.03		3989.68	3989.68	4584.13	5267.14	6051.93	6953.65
			2120.61		2635.84	2635.84	3028.57	3479.81	3998.29	4594.03
			1670.86		2209.94	2209.94	2539.22	2917.55	3352.26	3851.73
			1022.08		2070.56	2070.56	2379.07	2733.54	3140.83	3608.8
			5079.15		2012.86	2012.86	2312.77	2657.36	3053.3	3508.23
			2271.67		2989.95	2989.95	3435.44	3947.31	4535.45	5211.22
			2048.59		2284.74	2284.74	2625.16	3016.3	3465.72	3982.1
			1791.08		2478.42	2478.42	2847.7	3271.99	3759.51	4319.66
			1241.72		2543.56	2543.56	2922.55	3358	3858.32	4433.2
			5403.24		2959.02	2959.02	3399.9	3906.48	4488.53	5157.3
			1750.91		2767.28	2767.28	3179.59	3653.34	4197.68	4823.11
			1024.94		3252.72	3252.72	3737.36	4294.22	4934.04	5669.19
			2858.86		2907.94	2907.94	3341.21	3839.04	4411.05	5068.28
			2692.33		2870.02	2870.02	3297.65	3788.99	4353.53	5002.19
			1109.58		4086	4086	4694.8	5394.3	6198.04	7121.52
			1444.44		4648.58	4648.58	5341.2	6137.02	7051.41	8102.05
			1705.01		3515.63	3515.63	4039.45	4641.31	5332.85	6127.42
			2157.87		3689.94	3689.94	4239.73	4871.43	5597.26	6431.23
			1418.93		4129.11	4129.11	4744.33	5451.22	6263.43	7196.66
			2574.41		3058.01	3058.01	3513.64	4037.16	4638.69	5329.84
			843.338		3912.53	3912.53	4495.48	5165.3	5934.91	6819.19
			1954.65		3491.85	3491.85	4012.12	4609.91	5296.77	6085.98
			1883.28		4278.19	4278.19	4915.63	5648.04	6489.57	7456.5
			1373.75		4145.74	4145.74	4763.44	5473.18	6288.66	7225.65
			3075.72		4281.23	4281.23	4919.11	5652.04	6494.18	7461.79
			1941.55		3973.27	3973.27	4565.27	5245.48	6027.04	6925.05
			1313.63		4004.4	4004.4	4601.04	5286.58	6074.26	6979.3
			2343.87		2522.04	2522.04	2897.82	3329.58	3825.67	4395.69
			1418.7		2798.58	2798.58	3215.56	3694.67	4245.16	4877.67
			1793.26		2501.03	2501.03	2873.68	3301.84	3793.81	4359.07
			1483.73		2265.35	2265.35	2602.88	2990.7	3436.31	3948.31
			1824.66		4120.22	4120.22	4734.11	5439.48	6249.94	7181.16
			1468.84		4526.72	4526.72	5201.18	5976.14	6866.56	7889.66
			1876.7		4030.18	4030.18	4630.66	5320.61	6113.36	7024.23
			2299		4448.28	4448.28	5111.06	5872.59	6747.58	7752.95
			1360.4		4253.43	4253.43	4887.17	5615.34	6452.01	7413.34
			1742.05		4401.45	4401.45	5057.25	5810.76	6676.55	7671.33
			2192.4		4221.96	4221.96	4851.02	5573.8	6404.28	7358.49
			1232.2		4640.05	4640.05	5331.4	6125.76	7038.48	8087.19
			945.486		3192.09	3192.09	3667.7	4214.17	4842.07	5563.52
			1093.3		3691.56	3691.56	4241.59	4873.57	5599.71	6434.05
			2000.88		1823.77	1823.77	2095.51	2407.73	2766.47	3178.67
			758.314		1653.85	1653.85	1900.27	2183.4	2508.72	2882.51
			2347.1		1786.19	1786.19	2052.32	2358.11	2709.46	3113.16
			1737.46		1557.61	1557.61	1789.69	2056.35	2362.74	2714.78
			1661.3		3221.55	3221.55	3701.54	4253.06	4886.75	5614.86
			2154.68		1817.46	1817.46	2088.26	2399.4	2756.9	3167.67
			2012.06		1800.15	1800.15	2068.36	2376.54	2730.64	3137.49
			1785.82		1867.97	1867.97	2146.29	2466.08	2833.52	3255.71
			894.581		1717.3	1717.3	1973.17	2267.17	2604.97	2993.1
			7524.53		1663.55	1663.55	1911.41	2196.2	2523.43	2899.41
			1424.87		2538.71	2538.71	2916.97	3351.58	3850.96	4424.74
			1539.48		2252.14	2252.14	2587.7	2973.26	3416.27	3925.28
			835.548		2479.42	2479.42	2848.84	3273.31	3761.02	4321.4
			1333.77		2870.07	2870.07	3297.71	3789.05	4353.61	5002.28
			2522.92		3419.68	3419.68	3929.2	4514.64	5187.3	5960.19
			1322.95		2600.13	2600.13	2987.54	3432.67	3944.13	4531.79
			2864.7		2714.72	2714.72	3119.21	3583.96	4117.96	4731.52
			4600.94		3639.62	3639.62	4181.91	4804.99	5520.92	6343.52
			1104.45		3599	3599	4135.24	4751.37	5459.31	6272.72
			1259.04		3302.65	3302.65	3794.74	4360.14	5009.78	5756.22
			1413.56		3186.13	3186.13	3660.85	4206.3	4833.03	5553.13
			1798.14		2393.73	2393.73	2750.39	3160.18	3631.04	4172.05
			1595.35		3593.56	3593.56	4128.99	4744.19	5451.06	6263.25
			842.286		1225.14	1225.14	1407.68	1617.42	1858.41	2135.3
			1547.37		1860.84	1860.84	2138.1	2456.67	2822.71	3243.28
			2131.95		2854.39	2854.39	3279.69	3768.35	4329.82	4974.95
			958.394		2616.61	2616.61	3006.48	3454.43	3969.13	4560.51
			1017.65		2348.74	2348.74	2698.7	3100.79	3562.8	4093.64
			992.118		2289.99	2289.99	2631.2	3023.23	3473.68	3991.25
			1567.21		2463.84	2463.84	2830.95	3252.75	3737.4	4294.26
			1401.79		1813.73	1813.73	2083.97	2394.48	2751.24	3161.17
			2638.69		2916.3	2916.3	3350.82	3850.08	4423.73	5082.85
			1876.55		3560.74	3560.74	4091.27	4700.86	5401.27	6206.04
			1803.44		2892.19	2892.19	3323.11	3818.24	4387.15	5040.82
			2102.21		3346.68	3346.68	3845.32	4418.26	5076.57	5832.96
			1909.05		3120.6	3120.6	3585.55	4119.79	4733.62	5438.92
			2518.6		2791.4	2791.4	3207.31	3685.19	4234.27	4865.16
			2017.99		2420.83	2420.83	2781.53	3195.97	3672.15	4219.29
			2548.42		3065.99	3065.99	3522.81	4047.7	4650.79	5343.75
			1571.74		2894.04	2894.04	3325.24	3820.69	4389.96	5044.05
			1695.04		2774.16	2774.16	3187.5	3662.42	4208.11	4835.1
			2939.54		1982.43	1982.43	2277.8	2617.19	3007.14	3455.19
			1136.24		2108.85	2108.85	2423.06	2784.09	3198.91	3675.54
			1290.75		1786.27	1786.27	2052.42	2358.22	2709.59	3113.31
			1475.42		1454.37	1454.37	1671.06	1920.04	2206.12	2534.83
			1102.84		1449.09	1449.09	1665	1913.08	2198.12	2525.64
			948.908		1873.91	1873.91	2153.12	2473.92	2842.53	3266.06
			4030.99		3389	3389	3893.95	4474.14	5140.77	5906.72
			1887.34		3364.95	3364.95	3866.31	4442.38	5104.28	5864.8
			2437.76		2808.45	2808.45	3226.9	3707.69	4260.13	4894.87
			1393.22		2863.49	2863.49	3290.15	3780.36	4343.63	4990.81
			2383.57		3934.03	3934.03	4520.18	5193.67	5967.51	6856.65
			2016.32		1652.08	1652.08	1898.23	2181.06	2506.03	2879.42
			1533.82		4825.12	4825.12	5544.04	6370.09	7319.21	8409.74
			1909.33		3100.43	3100.43	3562.39	4093.17	4703.04	5403.78
			3509.69		2552.6	2552.6	2932.93	3369.93	3872.04	4448.95
			1661.2		3566.03	3566.03	4097.35	4707.84	5409.3	6215.26
			1827.68		3228.11	3228.11	3709.08	4261.72	4896.7	5626.29
			1316.77		3164.16	3164.16	3635.61	4177.31	4799.71	5514.85
			1896.22		3700.91	3700.91	4252.33	4885.92	5613.9	6450.35
			2246.57		2909.44	2909.44	3342.93	3841.02	4413.32	5070.89
			2209.35		2720.33	2720.33	3125.64	3591.35	4126.45	4741.28
			1538.94		3213.1	3213.1	3691.85	4241.92	4873.95	5600.15
			1371.97		3811.73	3811.73	4379.66	5032.22	5782	6643.5
			1495.85		3483.02	3483.02	4001.97	4598.25	5283.38	6070.58
			2055.7		3313.68	3313.68	3807.4	4374.69	5026.5	5775.44
			2177.27		3935.54	3935.54	4521.92	5195.67	5969.81	6859.28
			3209.65		3832.58	3832.58	4403.62	5059.74	5813.63	6679.84
			3355.16		2462.47	2462.47	2829.37	3250.94	3735.31	4291.86
			2449.43		2220.45	2220.45	2551.28	2931.42	3368.19	3870.03
			3792.93		2641.76	2641.76	3035.37	3487.63	4007.27	4604.34
			1544.31		1950.32	1950.32	2240.91	2574.79	2958.43	3399.22
			1958.36		2096.38	2096.38	2408.73	2767.62	3179.99	3653.8
			1426.86		3747.94	3747.94	4306.37	4948	5685.24	6532.32
			2261.11		2816.32	2816.32	3235.94	3718.08	4272.07	4908.59
			2669.14		3015.24	3015.24	3464.5	3980.7	4573.8	5255.28
			2553.63		2650.89	2650.89	3045.86	3499.68	4021.12	4620.25
			2714.53		2076.1	2076.1	2385.43	2740.85	3149.23	3618.45
			953.065		2369.19	2369.19	2722.19	3127.78	3593.81	4129.28
			2227.78		2172.93	2172.93	2496.69	2868.68	3296.11	3787.21
			1648.32		1670.83	1670.83	1919.78	2205.82	2534.48	2912.11
			1741.98		1421.23	1421.23	1632.99	1876.3	2155.86	2477.08
			1388.39		2831.12	2831.12	3252.95	3737.63	4294.52	4934.39
			1521.61		2091.11	2091.11	2402.68	2760.67	3171.99	3644.61
			814.165		2965.11	2965.11	3406.9	3914.51	4497.76	5167.91
			1128.24		1451.37	1451.37	1667.62	1916.08	2201.57	2529.6
			1363.82		2169.21	2169.21	2492.41	2863.77	3290.46	3780.73
			2021.34		2304.35	2304.35	2647.69	3042.18	3495.46	4016.27
			1657.88		2450.21	2450.21	2815.29	3234.75	3716.72	4270.5
			2029.43		3330.41	3330.41	3826.63	4396.78	5051.89	5804.6
			1485.99		1715.37	1715.37	1970.95	2264.62	2602.04	2989.73
			1206.86		2470.32	2470.32	2838.39	3261.3	3747.22	4305.55
			1642.81		3151.38	3151.38	3620.93	4160.44	4780.33	5492.58
			1987.38		3034.37	3034.37	3486.49	4005.96	4602.83	5288.64
			1798.47		2136.84	2136.84	2455.22	2821.04	3241.37	3724.32
			1332.56		2020.13	2020.13	2321.12	2666.96	3064.32	3520.9
			5101.73		2252.6	2252.6	2588.23	2973.87	3416.97	3926.08
			3606.04		3391.65	3391.65	3896.99	4477.63	5144.78	5911.33
			1727.29		2764.54	2764.54	3176.45	3649.73	4193.52	4818.34
			2286.52		1934	1934	2222.16	2553.26	2933.68	3370.79
			2136.25		3077.07	3077.07	3535.55	4062.33	4667.6	5363.06
			2160.06		2542.52	2542.52	2921.35	3356.62	3856.74	4431.38
			1071.98		1219.38	1219.38	1401.07	1609.82	1849.68	2125.27
			1979.33		3105	3105	3567.64	4099.2	4709.97	5411.74
			1635.72		3306.81	3306.81	3799.51	4365.63	5016.09	5763.47
			1801.56		2008.41	2008.41	2307.65	2651.49	3046.55	3500.47
			2389		2150.34	2150.34	2470.73	2838.86	3261.84	3747.85
			2838.58		1764.84	1764.84	2027.79	2329.92	2677.07	3075.95
			3542.36		2229.09	2229.09	2561.22	2942.83	3381.3	3885.11
			2724.3		2258.3	2258.3	2594.77	2981.39	3425.6	3936
			1728.07		2597.12	2597.12	2984.08	3428.7	3939.56	4526.54
			3423.78		3553.41	3553.41	4082.85	4691.18	5390.15	6193.27
			2376.29		6731.24	6731.24	7734.17	8886.54	10210.6	11731.9
			2407.57		7784.25	7784.25	8944.07	10276.7	11807.9	13567.2
			1575.49		3414.51	3414.51	3923.26	4507.82	5179.47	5951.19
			1644.35		2201.36	2201.36	2529.36	2906.22	3339.24	3836.78
			1189.44		2741.92	2741.92	3150.46	3619.87	4159.21	4778.92
			2891.64		2859.54	2859.54	3285.61	3775.15	4337.63	4983.93
			1917.95		2317.76	2317.76	2663.1	3059.89	3515.81	4039.65
			1903.04		3429.39	3429.39	3940.36	4527.46	5202.03	5977.11
			1173.85		3342.32	3342.32	3840.32	4412.51	5069.96	5825.37
			2731.03		3551.44	3551.44	4080.59	4688.59	5387.17	6189.84
			3273.36		2117.6	2117.6	2433.12	2795.64	3212.18	3690.79
			1072.61		2521.7	2521.7	2897.42	3329.13	3825.16	4395.09
			3394.64		2444.6	2444.6	2808.84	3227.34	3708.21	4260.72
			4130.43		2563.25	2563.25	2945.16	3383.98	3888.18	4467.51
			1300.72		1697.76	1697.76	1950.72	2241.37	2575.32	2959.04
			1855.29		2135.66	2135.66	2453.87	2819.49	3239.58	3722.27
			1738.65		2722.58	2722.58	3128.24	3594.33	4129.88	4745.22
			2024.28		3045.03	3045.03	3498.73	4020.02	4618.99	5307.21
			742.521		2626.97	2626.97	3018.37	3468.1	3984.84	4578.56
			1430.71		2212.04	2212.04	2541.62	2920.32	3355.43	3855.38
			2354.21		3445.07	3445.07	3958.37	4548.15	5225.81	6004.43
			1090.82		3288.27	3288.27	3778.21	4341.15	4987.97	5731.16
			2166.01		3346.95	3346.95	3845.63	4418.61	5076.97	5833.42
			3091.1		3877.72	3877.72	4455.48	5119.34	5882.1	6758.51
			2351.3		3295.07	3295.07	3786.03	4350.13	4998.29	5743.02
			4387.88		4399.92	4399.92	5055.5	5808.75	6674.23	7668.66
			1273.22		5647.74	5647.74	6489.23	7456.11	8567.04	9843.5
			1274.16		4438.71	4438.71	5100.06	5859.95	6733.07	7736.27
			2029.31		5615.28	5615.28	6451.93	7413.25	8517.8	9786.92
			1825.42		3657.4	3657.4	4202.34	4828.47	5547.89	6374.51
			3150.56		4483.64	4483.64	5151.69	5919.28	6801.23	7814.58
			2618.11		2797.67	2797.67	3214.51	3693.46	4243.77	4876.08
			900.73		5659.91	5659.91	6503.21	7472.17	8585.49	9864.7
			2680.56		4145.15	4145.15	4762.76	5472.39	6287.76	7224.61
			1771.34		2564.99	2564.99	2947.17	3386.28	3890.83	4470.55
			1972.63		2007.61	2007.61	2306.73	2650.43	3045.33	3499.07
			1859.83		2893.9	2893.9	3325.09	3820.51	4389.75	5043.81
			2012.76		2395.61	2395.61	2752.54	3162.66	3633.89	4175.32
			1074.8		4298.56	4298.56	4939.03	5674.92	6520.47	7491.99
			2309.74		2780.88	2780.88	3195.22	3671.3	4218.31	4846.82
			1925.91		2960.2	2960.2	3401.26	3908.03	4490.32	5159.36
			1382.05		1952.16	1952.16	2243.03	2577.23	2961.23	3402.44
			1096.07		3397.83	3397.83	3904.09	4485.79	5154.16	5922.11
			2143.37		2731.05	2731.05	3137.96	3605.51	4142.72	4759.97
			2197.24		2243.64	2243.64	2577.94	2962.04	3403.38	3910.47
			1220.73		2312.42	2312.42	2656.96	3052.84	3507.7	4030.34
			1214.27		2060.7	2060.7	2367.74	2720.52	3125.87	3591.61
			1764.97		3008.14	3008.14	3456.35	3971.33	4563.04	5242.92
			2318.69		2450.67	2450.67	2815.81	3235.35	3717.41	4271.29
			1573.26		3058.63	3058.63	3514.36	4037.99	4639.63	5330.92
			1791.68		7106.81	7106.81	8165.69	9382.35	10780.3	12386.5
			1770.44		2598.7	2598.7	2985.9	3430.79	3941.96	4529.3
			3298.12		3311.33	3311.33	3804.71	4371.6	5022.95	5771.35
			2136.71		3370.68	3370.68	3872.9	4449.95	5112.97	5874.79
			2057.79		2877.38	2877.38	3306.1	3798.7	4364.69	5015.01
			2214.95		3300.64	3300.64	3792.42	4357.48	5006.73	5752.72
			2187.07		2617.3	2617.3	3007.27	3455.34	3970.18	4561.72
			1295.85		2816.78	2816.78	3236.47	3718.69	4272.76	4909.39
			3591.21		3034.52	3034.52	3486.65	4006.15	4603.05	5288.89
			2259.59		3003.98	3003.98	3451.56	3965.83	4556.72	5235.66
			2553.62		2673.2	2673.2	3071.5	3529.14	4054.97	4659.14
			1672.71		3127.58	3127.58	3593.58	4129.01	4744.22	5451.1
			1579.99		3070.16	3070.16	3527.6	4053.2	4657.11	5351
			1269.45		2637.53	2637.53	3030.51	3482.05	4000.86	4596.98
			1313.06		2605.7	2605.7	2993.94	3440.03	3952.58	4541.5
			1611.3		2850.68	2850.68	3275.42	3763.45	4324.19	4968.48
			1003.52		3903.21	3903.21	4484.78	5152.99	5920.77	6802.94
			2544.44		2256.75	2256.75	2593	2979.34	3423.25	3933.31
			1739.07		2340.57	2340.57	2689.31	3090	3550.4	4079.4
			1935.96		2404.36	2404.36	2762.6	3174.21	3647.16	4190.57
			1740.02		2433.35	2433.35	2795.91	3212.49	3691.14	4241.11
			1754.65		3422.32	3422.32	3932.24	4518.13	5191.31	5964.8
			1570.67		1901.76	1901.76	2185.12	2510.69	2884.78	3314.6
			1596.72		3354.48	3354.48	3854.29	4428.56	5088.4	5846.56
			2011.4		3210.63	3210.63	3689	4238.65	4870.19	5595.84
			1838.32		2251.76	2251.76	2587.26	2972.75	3415.68	3924.61
			1860.87		2680.18	2680.18	3079.52	3538.36	4065.56	4671.31
			996.837		2184.99	2184.99	2510.55	2884.61	3314.41	3808.24
			1878.09		2707.23	2707.23	3110.6	3574.07	4106.59	4718.46
			1242.26		4007.91	4007.91	4605.07	5291.21	6079.58	6985.42
			2317.53		3533.45	3533.45	4059.92	4664.84	5359.88	6158.48
			1290.04		3045.44	3045.44	3499.2	4020.57	4619.62	5307.93
			1486.05		2446.08	2446.08	2810.54	3229.3	3710.45	4263.3
			1473.92		2298.78	2298.78	2641.29	3034.84	3487.02	4006.57
			862.13		2134.83	2134.83	2452.92	2818.39	3238.32	3720.82
			1666.86		2234.75	2234.75	2567.72	2950.3	3389.88	3894.96
			968.592		2188.15	2188.15	2514.18	2888.78	3319.2	3813.75
			2254.37		2618.35	2618.35	3008.47	3456.72	3971.76	4563.54
			2013.76		2730.3	2730.3	3137.1	3604.52	4141.58	4758.66
			1661.86		1962.32	1962.32	2254.7	2590.65	2976.64	3420.15
			1178.74		3272.03	3272.03	3759.55	4319.71	4963.33	5702.85
			2377.76		3558.42	3558.42	4088.61	4697.8	5397.76	6202
			3465		2567.1	2567.1	2949.59	3389.06	3894.02	4474.22
			2693.73		2467.22	2467.22	2834.82	3257.2	3742.51	4300.13
			1097.78		2588.87	2588.87	2974.6	3417.8	3927.04	4512.16
			2021.84		2974.49	2974.49	3417.68	3926.9	4511.99	5184.26
			1920.26		2499.8	2499.8	2872.26	3300.22	3791.94	4356.93
			1841.13		1895.64	1895.64	2178.08	2502.61	2875.49	3303.92
			1911.99		2934.4	2934.4	3371.61	3873.97	4451.18	5114.38
			1855.55		2636.04	2636.04	3028.8	3480.08	3998.6	4594.37
			1741.04		2860.05	2860.05	3286.19	3775.82	4338.41	4984.82
			1533.73		2064.46	2064.46	2372.05	2725.48	3131.57	3598.16
			1407.87		2638.37	2638.37	3031.48	3483.16	4002.14	4598.44
			1707.6		2987.07	2987.07	3432.14	3943.51	4531.08	5206.2
			2625.49		2505.71	2505.71	2879.05	3308.02	3800.91	4367.23
			997.476		2925.77	2925.77	3361.7	3862.59	4438.1	5099.36
			1407.06		3317.95	3317.95	3812.31	4380.33	5032.99	5782.89
			2459.49		2371.16	2371.16	2724.46	3130.39	3596.81	4132.72
			2008		1649.29	1649.29	1895.03	2177.38	2501.81	2874.57
			1507.77		2318.16	2318.16	2663.56	3060.42	3516.41	4040.34
			2176.21		2962.5	2962.5	3403.91	3911.07	4493.81	5163.37
			1747.4		3169.76	3169.76	3642.05	4184.7	4808.2	5524.61
			1605.09		2219.31	2219.31	2549.97	2929.91	3366.46	3868.05
			2918.84		3324.23	3324.23	3819.52	4388.62	5042.51	5793.82
			2055.66		2685.79	2685.79	3085.97	3545.77	4074.07	4681.1
			2844.77		3100.96	3100.96	3563	4093.87	4703.84	5404.7
			1641.04		3116.64	3116.64	3581	4114.56	4727.62	5432.01
			2115.96		2923.48	2923.48	3359.07	3859.56	4434.62	5095.36
			2397.63		3267.89	3267.89	3754.79	4314.25	4957.05	5695.64
			1316.94		2035.36	2035.36	2338.62	2687.06	3087.42	3547.44
			1119.61		2085.22	2085.22	2395.91	2752.9	3163.07	3634.36
			1951.73		3400.51	3400.51	3907.18	4489.33	5158.23	5926.79
			1049.06		1744.28	1744.28	2004.17	2302.79	2645.89	3040.12
			803.142		2368.57	2368.57	2721.48	3126.97	3592.88	4128.2
			2233.51		1561.02	1561.02	1793.61	2060.85	2367.91	2720.71
			2174.84		2406.26	2406.26	2764.79	3176.73	3650.05	4193.9
			4898.22		2331.33	2331.33	2678.69	3077.81	3536.39	4063.3
			2199.06		1945.37	1945.37	2235.22	2568.26	2950.92	3390.6
			2250.83		2084.43	2084.43	2395	2751.84	3161.86	3632.96
			3378.52		1220.94	1220.94	1402.85	1611.87	1852.03	2127.98
			1627.83		5125.66	5125.66	5889.36	6766.86	7775.09	8933.56
			2385.64		4815.01	4815.01	5532.43	6356.74	7303.87	8392.12
			1908.04		5899.51	5899.51	6778.51	7788.49	8948.94	10282.3
			2149.38		5629.42	5629.42	6468.19	7431.93	8539.26	9811.58
			2048.91		5287.22	5287.22	6074.99	6980.15	8020.16	9215.14
			2934.79		5190.34	5190.34	5963.68	6852.24	7873.2	9046.28
			1530.35		5649.75	5649.75	6491.55	7458.77	8570.09	9847.01
			2441.83		4196.62	4196.62	4821.91	5540.35	6365.85	7314.33
			1534.97		4310.73	4310.73	4953.01	5691	6538.93	7513.21
			2465.26		5042.62	5042.62	5793.96	6657.23	7649.14	8788.83
			1465.63		5171.53	5171.53	5942.07	6827.42	7844.68	9013.51
			1066.07		5197.09	5197.09	5971.44	6861.16	7883.45	9058.06
			1340.57		4887.75	4887.75	5616.01	6452.77	7414.21	8518.91
			1766		3718.04	3718.04	4272.02	4908.53	5639.88	6480.21
			1096.22		2312.71	2312.71	2657.29	3053.22	3508.14	4030.84
			1706.49		1897.96	1897.96	2180.74	2505.67	2879	3307.96
			3539.81		2650.65	2650.65	3045.59	3499.37	4020.77	4619.85
			3913.61		2417.9	2417.9	2778.16	3192.09	3667.7	4214.18
			2070.93		2116.65	2116.65	2432.03	2794.39	3210.74	3689.13
			2526.06		2917.37	2917.37	3352.05	3851.5	4425.36	5084.72
			886.722		2249.77	2249.77	2584.97	2970.13	3412.66	3921.14
			2040.37		1790.76	1790.76	2057.58	2364.15	2716.4	3121.14
			1932.2		2876.95	2876.95	3305.6	3798.12	4364.03	5014.26
			2543.91		2471.99	2471.99	2840.31	3263.51	3749.76	4308.46
			1521.75		1969.5	1969.5	2262.95	2600.12	2987.53	3432.66
			3710.14		2598.52	2598.52	2985.69	3430.54	3941.68	4528.98
			1516.03		1593.83	1593.83	1831.31	2104.16	2417.68	2777.9
			2298.79		3041.3	3041.3	3494.45	4015.11	4613.34	5300.72
			3207.26		2950.56	2950.56	3390.18	3895.31	4475.69	5142.55
			1698.68		3294.01	3294.01	3784.8	4348.72	4996.67	5741.15
			1903.04		3371.64	3371.64	3874	4451.21	5114.43	5876.46
			1749.58		3932.42	3932.42	4518.33	5191.55	5965.07	6853.84
			1317.21		2972.01	2972.01	3414.83	3923.62	4508.23	5179.94
			1186.12		3624.65	3624.65	4164.71	4785.24	5498.22	6317.44
			1539.62		4987.96	4987.96	5731.14	6585.06	7566.21	8693.55
			2179.82		3607.9	3607.9	4145.47	4763.13	5472.82	6288.25
			3750.93		2979.34	2979.34	3423.25	3933.3	4519.35	5192.72
			1532.24		3448.28	3448.28	3962.06	4552.4	5230.69	6010.04
			1334.15		4590.3	4590.3	5274.24	6060.08	6963.01	8000.48
			2020.81		1553.2	1553.2	1784.63	2050.53	2356.05	2707.09
			2475.43		1909.72	1909.72	2194.27	2521.2	2896.85	3328.48
			1870.38		2404.3	2404.3	2762.54	3174.14	3647.08	4190.48
			859.143		1945.87	1945.87	2235.8	2568.93	2951.69	3391.48
			2462.28		2311.26	2311.26	2655.63	3051.31	3505.95	4028.32
			1715.36		2418.8	2418.8	2779.2	3193.29	3669.08	4215.76
			1053.58		2376.2	2376.2	2730.25	3137.05	3604.45	4141.5
			4210.51		2113.71	2113.71	2428.64	2790.5	3206.27	3684
			1014.18		2147.99	2147.99	2468.03	2835.75	3258.27	3743.74
			1690.55		2309.21	2309.21	2653.28	3048.6	3502.84	4024.75
			2238.9		2062.44	2062.44	2369.73	2722.81	3128.5	3594.64
			1737.04		2478.61	2478.61	2847.92	3272.25	3759.8	4319.99
			2955.76		1875.66	1875.66	2155.13	2476.24	2845.19	3269.11
			1960.9		1672.2	1672.2	1921.36	2207.63	2536.56	2914.5
			2279.05		2274.61	2274.61	2613.52	3002.92	3450.35	3964.44
			1876.67		1385.5	1385.5	1591.93	1829.12	2101.66	2414.8
			1883.89		2302.06	2302.06	2645.06	3039.16	3491.99	4012.28
			1475.45		1372.28	1372.28	1576.74	1811.67	2081.6	2391.76
			2823.97		2513.92	2513.92	2888.48	3318.86	3813.36	4381.53
			2382.92		1668.54	1668.54	1917.15	2202.8	2531.01	2908.12
			1216.72		2382.71	2382.71	2737.73	3145.64	3614.33	4152.85
			2660.67		2034.23	2034.23	2337.33	2685.58	3085.72	3545.48
			1785.7		2411.4	2411.4	2770.69	3183.51	3657.84	4202.85
			1174.14		2141.02	2141.02	2460.02	2826.55	3247.7	3731.59
			2577.41		2123.5	2123.5	2439.89	2803.43	3221.13	3701.07
			2784.39		2794.26	2794.26	3210.6	3688.97	4238.61	4870.15
			3066.99		1433.48	1433.48	1647.06	1892.47	2174.44	2498.43
			2100.47		2043.25	2043.25	2347.69	2697.49	3099.4	3561.2
			4244.98		1657.36	1657.36	1904.31	2188.04	2514.05	2888.64
			1261.26		2110.18	2110.18	2424.59	2785.85	3200.93	3677.86
			1834.36		1808.67	1808.67	2078.15	2387.79	2743.56	3152.34
			1577.84		2080.64	2080.64	2390.65	2746.85	3156.12	3626.37
			4131.46		2783.77	2783.77	3198.54	3675.11	4222.69	4851.85
			1985.37		2102.23	2102.23	2415.46	2775.35	3188.87	3664
			975.647		2455.2	2455.2	2821.01	3241.34	3724.28	4279.19
			785.499		2471.94	2471.94	2840.25	3263.44	3749.68	4308.37
			2067.92		2199.97	2199.97	2527.76	2904.39	3337.13	3834.35
			3628.63		1882.12	1882.12	2162.55	2484.76	2854.98	3280.36
			4276.4		1909.43	1909.43	2193.92	2520.81	2896.4	3327.96
			2000.08		2053.96	2053.96	2359.99	2711.62	3115.65	3579.87
			3664.7		1838.18	1838.18	2112.06	2426.75	2788.32	3203.77
			1813.86		1495.77	1495.77	1718.63	1974.7	2268.92	2606.99
			3005.94		1326.39	1326.39	1524.01	1751.08	2011.99	2311.77
			1208.3		1537.88	1537.88	1767.01	2030.29	2332.8	2680.38
			3227.42		2526.91	2526.91	2903.41	3336	3833.06	4404.17
			4704.11		2154.55	2154.55	2475.57	2844.42	3268.23	3755.18
			2006.08		2985.01	2985.01	3429.77	3940.79	4527.95	5202.6
			2202.25		2856.81	2856.81	3282.47	3771.54	4333.49	4979.17
			1901.01		1623.97	1623.97	1865.94	2143.96	2463.4	2830.44
			1536.11		2104.69	2104.69	2418.28	2778.6	3192.6	3668.29
			2098.07		2387.78	2387.78	2743.55	3152.33	3622.02	4161.69
			1605.74		2478.74	2478.74	2848.07	3272.42	3760	4320.22
			1903.87		2771.09	2771.09	3183.97	3658.37	4203.46	4829.75
			5033.89		2364.34	2364.34	2716.61	3121.38	3586.45	4120.82
			3242.61		2240.54	2240.54	2574.37	2957.95	3398.67	3905.06
			1343.35		2359.67	2359.67	2711.25	3115.21	3579.37	4112.68
			1883.87		3186.5	3186.5	3661.28	4206.8	4833.59	5553.78
			1620		2297.87	2297.87	2640.24	3033.63	3485.63	4004.97
			4675.69		2839.33	2839.33	3262.38	3748.46	4306.97	4948.69
			2340.88		2122	2122	2438.17	2801.45	3218.86	3698.46
			1510.44		2356.08	2356.08	2707.13	3110.48	3573.93	4106.43
			1574.2		1549.21	1549.21	1780.04	2045.26	2349.99	2700.14
			1786.38		2218.84	2218.84	2549.44	2929.3	3365.76	3867.24
			1852.53		2829.85	2829.85	3251.49	3735.95	4292.59	4932.17
			1976.92		2758.61	2758.61	3169.64	3641.9	4184.53	4808.01
			2143.89		2510.29	2510.29	2884.32	3314.07	3807.85	4375.21
			1881.01		2584.48	2584.48	2969.55	3412.01	3920.39	4504.51
			2352.47		3586.28	3586.28	4120.62	4734.58	5440.01	6250.55
			1854.01		3371.65	3371.65	3874.01	4451.22	5114.44	5876.47
			738.939		2525.67	2525.67	2901.99	3334.37	3831.18	4402.01
			3846.29		4151.53	4151.53	4770.09	5480.82	6297.44	7235.74
			1257.3		3833.84	3833.84	4405.07	5061.41	5815.54	6682.03
			1830.71		2855.31	2855.31	3280.74	3769.56	4331.21	4976.54
			1490.66		4443.18	4443.18	5105.2	5865.86	6739.85	7744.06
			1785.81		3069.07	3069.07	3526.36	4051.77	4655.47	5349.12
			1930.49		3479.01	3479.01	3997.37	4592.97	5277.3	6063.6
			2572.05		2442.04	2442.04	2805.9	3223.97	3704.33	4256.26
			1383.82		1940.56	1940.56	2229.7	2561.91	2943.63	3382.22
			1965.42		1892.84	1892.84	2174.87	2498.92	2871.24	3299.05
			1875.91		1470.94	1470.94	1690.1	1941.92	2231.26	2563.71
			3524.59		1903.17	1903.17	2186.74	2512.55	2886.91	3317.05
			1813.25		2644	2644	3037.95	3490.59	4010.68	4608.26
			2842.79		2452.77	2452.77	2818.23	3238.13	3720.6	4274.96
			1953.75		2662.13	2662.13	3058.78	3514.53	4038.18	4639.85
			3055.54		2618.48	2618.48	3008.63	3456.9	3971.97	4563.78
			1930.33		1702.35	1702.35	1955.99	2247.43	2582.29	2967.04
			2162.28		1952.73	1952.73	2243.68	2577.98	2962.09	3403.43
			950.355		3745.48	3745.48	4303.55	4944.76	5681.51	6528.03
			1691.5		2608.53	2608.53	2997.19	3443.76	3956.86	4546.42
			1761		2454.24	2454.24	2819.91	3240.06	3722.82	4277.51
			1680.83		2111.06	2111.06	2425.6	2787.01	3202.26	3679.39
			882.792		1607.77	1607.77	1847.32	2122.57	2438.82	2802.2
			1202.9		2122.26	2122.26	2438.47	2801.79	3219.25	3698.9
			1882.34		2096.53	2096.53	2408.9	2767.82	3180.22	3654.06
			1242.62		1804.09	1804.09	2072.89	2381.74	2736.62	3144.36
			1795.02		2511.3	2511.3	2885.47	3315.4	3809.38	4376.96
			1566.97		2355.43	2355.43	2706.39	3109.63	3572.95	4105.31
			1157.82		1484.88	1484.88	1706.12	1960.33	2252.41	2588.01
			1836.7		2218.23	2218.23	2548.74	2928.49	3364.83	3866.17
			2486.69		1721.12	1721.12	1977.56	2272.21	2610.76	2999.76
			2289.4		1773.56	1773.56	2037.81	2341.44	2690.3	3091.15
			2930.12		1701.04	1701.04	1954.49	2245.7	2580.31	2964.76
			3193.49		2297.43	2297.43	2639.74	3033.05	3484.97	4004.22
			1783.98		2011.99	2011.99	2311.77	2656.22	3051.99	3506.72
			1995.07		1912.14	1912.14	2197.04	2524.39	2900.51	3332.68
			2133.15		2111.14	2111.14	2425.69	2787.11	3202.38	3679.52
			1565.83		1569.15	1569.15	1802.95	2071.59	2380.25	2734.89
			1963.71		2477.98	2477.98	2847.19	3271.41	3758.84	4318.89
			1724.42		3013.86	3013.86	3462.91	3978.87	4571.71	5252.88
			4539.21		2831.11	2831.11	3252.94	3737.61	4294.5	4934.37
			2794.71		2657.94	2657.94	3053.97	3509	4031.82	4632.55
			2236.46		2446.16	2446.16	2810.63	3229.4	3710.57	4263.43
			2543.01		2982.14	2982.14	3426.46	3936.99	4523.59	5197.59
			2305.2		2945.86	2945.86	3384.78	3889.1	4468.56	5134.36
			1859.19		2369.1	2369.1	2722.09	3127.67	3593.69	4129.13
			1645.86		2943.09	2943.09	3381.6	3885.45	4464.37	5129.54
			1180.08		2705.98	2705.98	3109.17	3572.42	4104.7	4716.28
			1418.49		2689.81	2689.81	3090.59	3551.07	4080.17	4688.1
			2029.03		3154.96	3154.96	3625.04	4165.16	4785.75	5498.81
			1539.65		4090.51	4090.51	4699.98	5400.26	6204.88	7129.38
			1067.97		2984.01	2984.01	3428.62	3939.47	4526.44	5200.86
			6468.33		2499.82	2499.82	2872.29	3300.25	3791.97	4356.96
			3935.54		2375.99	2375.99	2730.01	3136.77	3604.13	4141.14
			1023.19		3814.94	3814.94	4383.35	5036.45	5786.87	6649.09
			2372.64		3220.12	3220.12	3699.91	4251.18	4884.59	5612.37
			1647.17		3274.44	3274.44	3762.32	4322.89	4966.99	5707.05
			1006.05		2771.81	2771.81	3184.8	3659.32	4204.55	4831.01
			1233.09		2869.83	2869.83	3297.43	3788.73	4353.24	5001.86
			1867.76		2147.82	2147.82	2467.83	2835.53	3258.02	3743.45
			2997.25		2472.97	2472.97	2841.43	3264.79	3751.23	4310.15
			1358.73		2424.4	2424.4	2785.63	3200.68	3677.57	4225.51
			2110.59		2607.52	2607.52	2996.03	3442.43	3955.34	4544.68
			2563.02		2010.77	2010.77	2310.37	2654.61	3050.14	3504.59
			2553.16		2538.17	2538.17	2916.35	3350.88	3850.15	4423.81
			1367.03		3133.79	3133.79	3600.71	4137.21	4753.63	5461.91
			1648.64		3275.78	3275.78	3763.86	4324.67	4969.02	5709.39
			2787.02		2436.96	2436.96	2800.06	3217.26	3696.62	4247.4
			3574.18		2655.47	2655.47	3051.12	3505.73	4028.07	4628.24
			1561.07		3210.83	3210.83	3689.23	4238.91	4870.5	5596.18
			1609.29		2835.11	2835.11	3257.53	3742.89	4300.57	4941.34
			1415.97		2347.64	2347.64	2697.43	3099.34	3561.13	4091.73
			2551.34		2457.26	2457.26	2823.38	3244.05	3727.4	4282.77
			1148.17		2891	2891	3321.75	3816.68	4385.35	5038.75
			1388.16		2357.25	2357.25	2708.48	3112.03	3575.71	4108.48
			1637.03		1483.76	1483.76	1704.84	1958.85	2250.72	2586.07
			1266.81		1937.61	1937.61	2226.3	2558.02	2939.15	3377.07
			1945.24		2096.49	2096.49	2408.86	2767.77	3180.16	3653.99
			1043.49		1963.27	1963.27	2255.79	2591.89	2978.08	3421.8
			2073.79		4361.04	4361.04	5010.82	5757.41	6615.24	7600.89
			2248.18		3316.9	3316.9	3811.11	4378.95	5031.4	5781.06
			2013.86		1903.72	1903.72	2187.36	2513.27	2887.74	3318
			1095.07		3590.95	3590.95	4125.99	4740.75	5447.11	6258.7
			2035.67		2231.68	2231.68	2564.2	2946.25	3385.23	3889.62
			2507.78		2990.23	2990.23	3435.77	3947.69	4535.88	5211.71
			2651.13		3379.69	3379.69	3883.26	4461.85	5126.65	5890.5
			1889.45		3127.04	3127.04	3592.95	4128.29	4743.39	5450.14
			1646.87		2947.05	2947.05	3386.15	3890.68	4470.37	5136.44
			1621.75		3208.54	3208.54	3686.6	4235.89	4867.02	5592.19
			1957.77		1379.82	1379.82	1585.41	1821.63	2093.05	2404.9
			1865.74		1553.35	1553.35	1784.79	2050.72	2356.27	2707.35
			1655.1		2190.46	2190.46	2516.83	2891.82	3322.69	3817.76
			2251.98		3064.81	3064.81	3521.45	4046.13	4648.99	5341.68
			1241.7		2389.43	2389.43	2745.45	3154.51	3624.52	4164.56
			1682.08		1582.15	1582.15	1817.89	2088.75	2399.96	2757.55
			1592.1		2172.69	2172.69	2496.41	2868.37	3295.75	3786.8
			2672.04		1805.14	1805.14	2074.1	2383.13	2738.21	3146.19
			1431.19		2534.67	2534.67	2912.33	3346.25	3844.83	4417.7
			1660.4		3280.71	3280.71	3769.52	4331.17	4976.5	5717.98
			1781.63		2608.36	2608.36	2997	3443.54	3956.61	4546.14
			2056.3		2647.91	2647.91	3042.44	3495.75	4016.6	4615.06
			2140.26		3351.33	3351.33	3850.67	4424.4	5083.62	5841.06
			1675.84		2044.98	2044.98	2349.68	2699.77	3102.03	3564.22
			2314		2332.97	2332.97	2680.57	3079.96	3538.87	4066.15
			2373.01		2279.05	2279.05	2618.62	3008.78	3457.08	3972.17
			2889.02		2499.91	2499.91	2872.38	3300.36	3792.1	4357.11
			2489.8		1590.39	1590.39	1827.35	2099.62	2412.46	2771.91
			1510.58		2157.12	2157.12	2478.53	2847.82	3272.14	3759.67
			1958.63		1807.26	1807.26	2076.54	2385.94	2741.43	3149.9
			2220.38		1308.97	1308.97	1504.01	1728.1	1985.58	2281.42
			1447.35		2183.27	2183.27	2508.56	2882.33	3311.79	3805.23
			2365.52		1983.28	1983.28	2278.79	2618.32	3008.44	3456.68
			3991.93		3355.19	3355.19	3855.11	4429.5	5089.48	5847.8
			1765.08		3623.31	3623.31	4163.17	4783.46	5496.18	6315.09
			1486.22		3536.38	3536.38	4063.29	4668.7	5364.32	6163.59
			2142.9		3631.02	3631.02	4172.03	4793.65	5507.89	6328.55
			2106.19		2976.33	2976.33	3419.79	3929.33	4514.79	5187.48
			2028.09		3135.11	3135.11	3602.23	4138.95	4755.64	5464.22
			2499.81		4092.59	4092.59	4702.37	5403.01	6208.03	7133.01
			1244.7		2690.87	2690.87	3091.8	3552.46	4081.77	4689.93
			1703.89		3659.83	3659.83	4205.13	4831.68	5551.59	6378.75
			2491.27		2374.96	2374.96	2728.82	3135.4	3602.57	4139.34
			1670.57		3251.26	3251.26	3735.69	4292.29	4931.83	5666.65
			3754.15		2888.57	2888.57	3318.95	3813.47	4381.66	5034.51
			898.04		2963.74	2963.74	3405.33	3912.71	4495.69	5165.54
			1561.04		2961.27	2961.27	3402.49	3909.44	4491.94	5161.22
			2309.6		3116.91	3116.91	3581.32	4114.93	4728.04	5432.5
			1449.11		2080.29	2080.29	2390.25	2746.39	3155.59	3625.76
			2713.94		3023.71	3023.71	3474.23	3991.88	4586.66	5270.06
			2297.06		2693.5	2693.5	3094.82	3555.93	4085.76	4694.52
			2188.4		2798.81	2798.81	3215.83	3694.97	4245.51	4878.07
			3495.98		2102.33	2102.33	2415.57	2775.48	3189.02	3664.17
			1109.81		3248.77	3248.77	3732.83	4289	4928.05	5662.31
			2213.09		1429.22	1429.22	1642.17	1886.84	2167.98	2491
			909.875		3073.62	3073.62	3531.58	4057.77	4662.36	5357.04
			1661.36		2411.17	2411.17	2770.42	3183.21	3657.49	4202.45
			1469.51		2597.16	2597.16	2984.13	3428.75	3939.62	4526.61
			1812.45		3590.82	3590.82	4125.85	4740.58	5446.91	6258.48
			1806.47		3244.14	3244.14	3727.5	4282.89	4921.02	5654.23
			2397.01		2722.23	2722.23	3127.83	3593.87	4129.35	4744.6
			1721.81		3643.69	3643.69	4186.58	4810.37	5527.09	6350.61
			2635.8		3496.75	3496.75	4017.75	4616.38	5304.21	6094.52
			2695.8		3431.61	3431.61	3942.91	4530.39	5205.4	5980.99
			2367.1		3304.11	3304.11	3796.41	4362.06	5011.99	5758.76
			1598.32		1196.79	1196.79	1375.11	1580	1815.41	2085.9
			1962.76		3035	3035	3487.21	4006.79	4603.78	5289.73
			2494.38		4101.46	4101.46	4712.56	5414.72	6221.49	7148.47
			3293.7		3246.93	3246.93	3730.71	4286.58	4925.26	5659.11
			1376.01		3943.49	3943.49	4531.06	5206.17	5981.87	6873.14
			1033.56		3737.02	3737.02	4293.82	4933.58	5668.67	6513.28
			1975.8		2838.11	2838.11	3260.98	3746.86	4305.12	4946.57
			1278.65		3219.05	3219.05	3698.67	4249.76	4882.96	5610.5
			1082.65		3625.85	3625.85	4166.08	4786.81	5500.03	6319.52
			2108.95		3589.54	3589.54	4124.37	4738.88	5444.96	6256.24
			982.701		2845.77	2845.77	3269.78	3756.97	4316.74	4959.92
			2140.84		3465.85	3465.85	3982.25	4575.59	5257.33	6040.66
			2090.95		3109.57	3109.57	3572.89	4105.23	4716.9	5419.7
			1362.21		3819.93	3819.93	4389.09	5043.05	5794.44	6657.8
			1489.92		3378.42	3378.42	3881.79	4460.16	5124.71	5888.28
			1968.14		3565.46	3565.46	4096.7	4707.09	5408.43	6214.26
			1422.81		3143.82	3143.82	3612.24	4150.45	4768.85	5479.39
			1953.55		3221.31	3221.31	3701.27	4252.75	4886.39	5614.44
			2025.21		3507.85	3507.85	4030.5	4631.03	5321.04	6113.86
			1990.99		3373.37	3373.37	3875.99	4453.5	5117.06	5879.48
			1695.19		2575.55	2575.55	2959.3	3400.22	3906.84	4488.95
			1514.86		2680.91	2680.91	3080.36	3539.32	4066.66	4672.58
			1286.33		2742.23	2742.23	3150.81	3620.27	4159.67	4779.45
			2160.5		2928.9	2928.9	3365.3	3866.71	4442.84	5104.81
			962.064		2415.44	2415.44	2775.33	3188.84	3663.97	4209.88
			2608.32		3302.92	3302.92	3795.04	4360.49	5010.19	5756.69
			2677.82		3393.97	3393.97	3899.66	4480.7	5148.3	5915.38
			1307.65		1670.84	1670.84	1919.79	2205.83	2534.5	2912.13
			1828.95		1273.68	1273.68	1463.45	1681.5	1932.04	2219.91
			2369.57		1519.69	1519.69	1746.12	2006.29	2305.22	2648.68
			1412.67		1753.58	1753.58	2014.85	2315.06	2659.99	3056.32
			2052.3		1397.28	1397.28	1605.47	1844.68	2119.53	2435.34
			2651.58		2171.63	2171.63	2495.2	2866.97	3294.14	3784.96
			2218.61		2418.43	2418.43	2778.77	3192.8	3668.51	4215.11
			1420.27		2874.8	2874.8	3303.14	3795.29	4360.78	5010.52
			2951.47		1953.15	1953.15	2244.16	2578.53	2962.73	3404.16
			1318.71		2039.9	2039.9	2343.84	2693.06	3094.32	3555.36
			1719.83		2090.72	2090.72	2402.23	2760.16	3171.41	3643.94
			1461.89		1841.43	1841.43	2115.79	2431.04	2793.25	3209.44
			2449.88		2518.42	2518.42	2893.66	3324.8	3820.18	4389.38
			1166.58		1868.06	1868.06	2146.39	2466.2	2833.65	3255.86
			1561.25		3218.75	3218.75	3698.33	4249.37	4882.51	5609.99
			967.935		3111.53	3111.53	3575.13	4107.81	4719.86	5423.11
			2458.18		3214.13	3214.13	3693.02	4243.27	4875.5	5601.94
			1929.81		1362.84	1362.84	1565.9	1799.21	2067.29	2375.31
			1452.4		5907.8	5907.8	6788.04	7799.43	8961.52	10296.8
			3077.75		5184.05	5184.05	5956.45	6843.94	7863.67	9035.33
			1068.03		6258.13	6258.13	7190.57	8261.94	9492.94	10907.4
			1168.04		2217.2	2217.2	2547.55	2927.13	3363.26	3864.37
			1210.42		3911.62	3911.62	4494.44	5164.09	5933.52	6817.6
			1231.02		4772	4772	5483.01	6299.96	7238.63	8317.16
			2746.9		4495.62	4495.62	5165.45	5935.08	6819.39	7835.45
			1754.45		3986.86	3986.86	4580.88	5263.42	6047.65	6948.73
			3405.56		3912.7	3912.7	4495.67	5165.51	5935.16	6819.47
			3182.38		3306.91	3306.91	3799.63	4365.76	5016.25	5763.65
			1562.28		4913.63	4913.63	5645.75	6486.95	7453.48	8564.02
			2150		5034.54	5034.54	5784.67	6646.56	7636.88	8774.74
			1854.28		2394.67	2394.67	2751.46	3161.42	3632.46	4173.68
			3125.31		3449.37	3449.37	3963.32	4553.84	5232.34	6011.94
			2402.99		1435.66	1435.66	1649.57	1895.35	2177.75	2502.23
			1443.9		3070.84	3070.84	3528.39	4054.11	4658.15	5352.2
			2954.46		3656.44	3656.44	4201.23	4827.2	5546.44	6372.83
			1864.55		2040.92	2040.92	2345.01	2694.41	3095.86	3557.14
			1744.01		3541.84	3541.84	4069.56	4675.91	5372.6	6173.1
			1754.74		2382.95	2382.95	2738	3145.95	3614.68	4153.26
			1747.06		3004.85	3004.85	3452.57	3966.99	4558.05	5237.19
			1023.94		1773.61	1773.61	2037.88	2341.51	2690.39	3091.25
			1498.52		2068.96	2068.96	2377.22	2731.42	3138.39	3606
			1853.46		1563.6	1563.6	1796.57	2064.25	2371.82	2725.21
			2029.61		3301.05	3301.05	3792.9	4358.03	5007.36	5753.44
			1583.11		2779.4	2779.4	3193.52	3669.34	4216.06	4844.24
			1070.3		2349.52	2349.52	2699.59	3101.82	3563.98	4095
			2379.79		2193.88	2193.88	2520.76	2896.35	3327.9	3823.74
			1349.43		3239.65	3239.65	3722.34	4276.96	4914.21	5646.41
			2139.5		1802.47	1802.47	2071.03	2379.61	2734.16	3141.54
			1741.07		2296.4	2296.4	2638.56	3031.69	3483.41	4002.42
			2123.69		1430.66	1430.66	1643.83	1888.75	2170.17	2493.51
			1431.39		2174.61	2174.61	2498.62	2870.9	3298.65	3790.14
			1815.39		1984.08	1984.08	2279.7	2619.36	3009.64	3458.07
			1837.6		4369.21	4369.21	5020.21	5768.2	6627.64	7615.14
			1873.06		4187.54	4187.54	4811.47	5528.36	6352.07	7298.5
			1691.73		3862.62	3862.62	4438.14	5099.41	5859.2	6732.2
			1440.95		6001.72	6001.72	6895.95	7923.42	9103.99	10460.4
			1400.66		3756.52	3756.52	4316.22	4959.32	5698.25	6547.27
			1244.81		4199.83	4199.83	4825.58	5544.58	6370.7	7319.91
			1796.21		4566.62	4566.62	5247.03	6028.82	6927.09	7959.2
			1536.55		3643.95	3643.95	4186.89	4810.72	5527.5	6351.07
			1463.94		4403.57	4403.57	5059.68	5813.56	6679.76	7675.02
			930.667		4798.63	4798.63	5513.61	6335.12	7279.03	8363.58
			1419.3		5354.67	5354.67	6152.5	7069.2	8122.49	9332.71
			1478.3		5291.17	5291.17	6079.53	6985.36	8026.15	9222.02
			1744.7		4610.15	4610.15	5297.04	6086.28	6993.12	8035.07
			1078.73		4036.01	4036.01	4637.36	5328.32	6122.22	7034.4
			3226.27		4085.72	4085.72	4694.48	5393.94	6197.62	7121.04
			2699.62		4994.77	4994.77	5738.97	6594.05	7576.54	8705.42
			2288.48		2264.35	2264.35	2601.73	2989.37	3434.78	3946.55
			3253.29		1937.56	1937.56	2226.25	2557.95	2939.07	3376.98
			2565.52		3451.08	3451.08	3965.28	4556.09	5234.93	6014.92
			1682.02		4009.09	4009.09	4606.43	5292.78	6081.38	6987.49
			1236.64		1965.36	1965.36	2258.19	2594.65	2981.24	3425.44
			1052.19		2644.86	2644.86	3038.94	3491.73	4011.98	4609.75
			1552.69		3130.74	3130.74	3597.2	4133.18	4749	5456.59
			1182.77		2108.98	2108.98	2423.2	2784.25	3199.1	3675.75
			1690.27		2500.49	2500.49	2873.05	3301.13	3792.99	4358.13
			1550.8		3893.6	3893.6	4473.73	5140.3	5906.19	6786.19
			1435.64		2935.32	2935.32	3372.67	3875.19	4452.58	5115.99
			2030		3544.83	3544.83	4073	4679.86	5377.14	6178.32
			1461.84		4069.12	4069.12	4675.41	5372.03	6172.44	7092.11
			2467.83		3296.1	3296.1	3787.21	4351.49	4999.85	5744.81
			1655.6		2059.81	2059.81	2366.72	2719.35	3124.52	3590.06
			2516.06		1678.46	1678.46	1928.54	2215.89	2546.05	2925.4
			1739.1		1363.59	1363.59	1566.76	1800.2	2068.42	2376.61
			2527.92		3835.78	3835.78	4407.3	5063.97	5818.48	6685.42
			1463.14		4187.58	4187.58	4811.51	5528.41	6352.12	7298.56
			961.738		4308.9	4308.9	4950.91	5688.58	6536.16	7510.02
			1570.62		4420.01	4420.01	5078.58	5835.27	6704.7	7703.68
			1385.1		3143.78	3143.78	3612.19	4150.4	4768.79	5479.32
			3423.5		3839.96	3839.96	4412.1	5069.48	5824.82	6692.7
			1184.36		4889.99	4889.99	5618.58	6455.73	7417.61	8522.81
			2351.05		3835.97	3835.97	4407.52	5064.22	5818.77	6685.75
			2541.11		4953.17	4953.17	5691.18	6539.14	7513.45	8632.93
			1611.1		5051.99	5051.99	5804.71	6669.59	7663.34	8805.15
			1386.8		3369.78	3369.78	3871.87	4448.76	5111.61	5873.23
			3514.86		4105.75	4105.75	4717.49	5420.38	6227.99	7155.94
			636.421		4312.15	4312.15	4954.65	5692.88	6541.09	7515.69
			2041.53		4137.79	4137.79	4754.31	5462.68	6276.6	7211.79
			1419.61		4168.13	4168.13	4789.17	5502.74	6322.62	7264.67
			1142.15		2683.78	2683.78	3083.66	3543.11	4071.02	4677.59
			1945.46		1893.99	1893.99	2176.19	2500.43	2872.98	3301.05
			2619.21		2269.35	2269.35	2607.47	2995.98	3442.36	3955.26
			1829.38		2668.62	2668.62	3066.23	3523.09	4048.02	4651.16
			1820.4		3002.81	3002.81	3450.22	3964.29	4554.95	5233.62
			1612.81		2325.59	2325.59	2672.09	3070.22	3527.67	4053.29
			5432.17		2409.12	2409.12	2768.07	3180.51	3654.39	4198.88
			2124.55		2474.35	2474.35	2843.02	3266.62	3753.33	4312.57
			1738.86		2608.86	2608.86	2997.58	3444.2	3957.38	4547.01
			1699.83		2683.96	2683.96	3083.86	3543.34	4071.29	4677.9
			2255.5		2328.54	2328.54	2675.48	3074.12	3532.15	4058.43
			1819.39		2554.14	2554.14	2934.7	3371.96	3874.37	4451.64
			877.367		3657.27	3657.27	4202.19	4828.3	5547.7	6374.29
			1792.32		4083.08	4083.08	4691.44	5390.45	6193.6	7116.43
			1873.64		3540.2	3540.2	4067.68	4673.75	5370.12	6170.25
			1524.42		2695.8	2695.8	3097.46	3558.98	4089.25	4698.53
			1132.07		4155.56	4155.56	4774.72	5486.14	6303.55	7242.76
			2377.9		3156.05	3156.05	3626.29	4166.6	4787.41	5500.71
			2298.56		3748.41	3748.41	4306.91	4948.62	5685.95	6533.13
			1977.99		2758.55	2758.55	3169.57	3641.82	4184.44	4807.91
			1506.35		3243.84	3243.84	3727.17	4282.5	4920.58	5653.73
			1881.07		3839.59	3839.59	4411.68	5069	5824.26	6692.06
			1768.26		2931.05	2931.05	3367.77	3869.56	4446.11	5108.56
			3273.26		4350.51	4350.51	4998.72	5743.51	6599.28	7582.54
			1498.62		3898.38	3898.38	4479.22	5146.61	5913.44	6794.52
			1457.09		3407.96	3407.96	3915.74	4499.17	5169.53	5939.77
			1553.07		3315.52	3315.52	3809.52	4377.13	5029.31	5778.66
			760.871		4562.98	4562.98	5242.85	6024.02	6921.58	7952.87
			4579.32		3870.92	3870.92	4447.68	5110.37	5871.79	6746.67
			3071.87		3548.92	3548.92	4077.7	4685.26	5383.35	6185.45
			2335.01		3576.63	3576.63	4109.53	4721.83	5425.37	6233.73
			1901.48		1934.02	1934.02	2222.19	2553.29	2933.72	3370.83
			1044.78		3519.76	3519.76	4044.19	4646.76	5339.11	6134.61
			1454.54		3012.85	3012.85	3461.75	3977.54	4570.18	5251.12
			2621.35		3700.73	3700.73	4252.13	4885.68	5613.63	6450.04
			2369.19		3533.96	3533.96	4060.51	4665.51	5360.66	6159.38
			1867.92		3230.49	3230.49	3711.82	4264.87	4900.32	5630.45
			1570.31		4125.68	4125.68	4740.39	5446.69	6258.22	7190.68
			1337.12		5140.48	5140.48	5906.4	6786.43	7797.58	8959.4
			1952.17		3518.54	3518.54	4042.79	4645.15	5337.26	6132.5
			2625.58		1531.34	1531.34	1759.51	2021.67	2322.89	2668.99
			3387.94		1715.45	1715.45	1971.04	2264.72	2602.16	2989.87
			1724.49		3217.87	3217.87	3697.32	4248.2	4881.17	5608.45
			2212.85		1616.83	1616.83	1857.73	2134.53	2452.57	2817.99
			1652.68		2165.82	2165.82	2488.51	2859.29	3285.32	3774.82
			1071.34		2020.4	2020.4	2321.43	2667.32	3064.74	3521.37
			1709.46		2574.46	2574.46	2958.04	3398.78	3905.19	4487.04
			1009.44		2231.96	2231.96	2564.52	2946.62	3385.66	3890.11
			2081.22		3617.47	3617.47	4156.46	4775.76	5487.33	6304.93
			1539.43		2043.3	2043.3	2347.74	2697.55	3099.47	3561.28
			1588.47		2003.47	2003.47	2301.98	2644.97	3039.06	3491.87
			1029.91		2811.65	2811.65	3230.57	3711.92	4264.98	4900.45
			1746.53		2077.02	2077.02	2386.49	2742.07	3150.63	3620.06
			2754.86		1527.27	1527.27	1754.83	2016.3	2316.72	2661.9
			1262.64		2599.88	2599.88	2987.25	3432.34	3943.75	4531.36
			2007.64		1598.09	1598.09	1836.2	2109.78	2424.13	2785.32
			1175.83		2552.4	2552.4	2932.7	3369.66	3871.72	4448.6
			1727.06		1859.61	1859.61	2136.68	2455.04	2820.83	3241.13
			1117.44		1536.88	1536.88	1765.87	2028.98	2331.29	2678.65
			2226.33		1940.05	1940.05	2229.11	2561.25	2942.86	3381.34
			1758.5		1528.43	1528.43	1756.16	2017.82	2318.47	2663.91
			1794.64		1888.68	1888.68	2170.09	2493.42	2864.93	3291.8
			2224.88		2130.2	2130.2	2447.59	2812.27	3231.29	3712.74
			1915.47		1270.14	1270.14	1459.39	1676.83	1926.67	2213.74
			1976.48		2216.42	2216.42	2546.66	2926.1	3362.08	3863.01
			1888.45		2103.77	2103.77	2417.23	2777.38	3191.21	3666.68
			1507.28		1787.69	1787.69	2054.05	2360.1	2711.74	3115.78
			1741.73		1569.51	1569.51	1803.36	2072.06	2380.79	2735.51
			1555.04		3450.81	3450.81	3964.97	4555.74	5234.53	6014.45
			1604.37		2281.56	2281.56	2621.51	3012.1	3460.9	3976.56
			2902.58		1817.19	1817.19	2087.94	2399.04	2756.48	3167.19
			1410.74		1621.05	1621.05	1862.58	2140.1	2458.96	2825.34
			794.206		2054.97	2054.97	2361.16	2712.96	3117.18	3581.63
			1424.25		1749.77	1749.77	2010.48	2310.03	2654.22	3049.68
			1372.04		2150.06	2150.06	2470.41	2838.49	3261.42	3747.36
			1863.17		2020.5	2020.5	2321.55	2667.45	3064.89	3521.55
			3952.64		2207.16	2207.16	2536.02	2913.87	3348.03	3846.87
			1598.87		2278.05	2278.05	2617.47	3007.46	3455.56	3970.43
			5453.05		1702.9	1702.9	1956.63	2248.16	2583.13	2968
			1400.51		1765.4	1765.4	2028.44	2330.67	2677.93	3076.93
			1340.06		1641.87	1641.87	1886.51	2167.59	2490.55	2861.63
			2330.92		1830.63	1830.63	2103.39	2416.79	2776.88	3190.62
			1516.41		2257.21	2257.21	2593.52	2979.95	3423.95	3934.11
			1620.61		1536.35	1536.35	1765.27	2028.28	2330.49	2677.73
			692.514		2104.22	2104.22	2417.74	2777.98	3191.88	3667.46
			2297.8		1644.57	1644.57	1889.6	2171.15	2494.64	2866.34
			1354.23		2177.44	2177.44	2501.87	2874.65	3302.96	3795.09
			2063.17		1868.22	1868.22	2146.58	2466.41	2833.9	3256.14
			2915.84		2439.51	2439.51	2802.99	3220.62	3700.49	4251.84
			951.985		1650.76	1650.76	1896.72	2179.33	2504.04	2877.13
			1142.87		1195.55	1195.55	1373.68	1578.35	1813.52	2083.73
			2176.15		2153.33	2153.33	2474.17	2842.81	3266.38	3753.06
			1674.68		1454.69	1454.69	1671.43	1920.47	2206.61	2535.39
			1794.21		1673.08	1673.08	1922.37	2208.79	2537.89	2916.03
			886.068		1728.92	1728.92	1986.52	2282.51	2622.59	3013.35
			2219.64		2777.56	2777.56	3191.4	3666.91	4213.27	4841.03
			1466.71		2448.28	2448.28	2813.06	3232.2	3713.78	4267.12
			2041.74		3589.63	3589.63	4124.47	4739	5445.09	6256.39
			1825.44		1940.15	1940.15	2229.23	2561.37	2943.01	3381.51
			2804.21		2735.71	2735.71	3143.32	3611.66	4149.78	4768.09
			1686.1		2026.16	2026.16	2328.05	2674.92	3073.47	3531.4
			1140.59		1641.96	1641.96	1886.61	2167.7	2490.68	2861.79
			2030.05		1623.74	1623.74	1865.67	2143.65	2463.05	2830.03
			1245.28		1836.27	1836.27	2109.87	2424.23	2785.43	3200.45
			1433.85		3585.01	3585.01	4119.16	4732.9	5438.09	6248.34
			3025.43		2403.95	2403.95	2762.13	3173.68	3646.54	4189.87
			2020.72		2736.04	2736.04	3143.7	3612.11	4150.3	4768.67
			2985.25		1381.83	1381.83	1587.72	1824.29	2096.1	2408.41
			1337.56		1470.85	1470.85	1690	1941.81	2231.13	2563.56
			2638.88		1311.4	1311.4	1506.79	1731.3	1989.26	2285.65
			1922.45		1708.8	1708.8	1963.4	2255.94	2592.07	2978.28
			5065.62		2102.98	2102.98	2416.32	2776.35	3190.01	3665.31
			2444.09		1957.44	1957.44	2249.09	2584.19	2969.23	3411.63
			1727.58		3246.08	3246.08	3729.74	4285.46	4923.97	5657.63
			2357.1		2187.53	2187.53	2513.46	2887.96	3318.25	3812.66
			1403.35		1768.99	1768.99	2032.57	2335.41	2683.38	3083.19
			2102.25		3039.13	3039.13	3491.95	4012.24	4610.05	5296.93
			4605.56		3164.54	3164.54	3636.05	4177.8	4800.28	5515.51
			2335.68		4624.83	4624.83	5313.91	6105.66	7015.38	8060.65
			1184.5		3584.91	3584.91	4119.05	4732.78	5437.94	6248.18
			2551.52		3511.03	3511.03	4034.16	4635.23	5325.87	6119.4
			2032.07		2991.33	2991.33	3437.03	3949.14	4537.55	5213.62
			1943.19		3713.7	3713.7	4267.03	4902.8	5633.3	6472.64
			1574.62		2051.16	2051.16	2356.78	2707.93	3111.4	3574.99
			2370.23		3914.46	3914.46	4497.7	5167.84	5937.83	6822.54
			3696.97		4536.39	4536.39	5212.29	5988.91	6881.23	7906.51
			1591.31		4295.45	4295.45	4935.46	5670.83	6515.76	7486.58
			4563.5		5678.72	5678.72	6524.83	7497.01	8614.03	9897.49
			1933.76		4613.42	4613.42	5300.8	6090.6	6998.08	8040.76
			1480.9		5974.72	5974.72	6864.93	7887.78	9063.04	10413.4
			1822.26		5878.87	5878.87	6754.81	7761.25	8917.65	10246.3
			2123.85		5076.3	5076.3	5832.65	6701.7	7700.23	8847.54
			1240.82		3729.44	3729.44	4285.11	4923.57	5657.17	6500.07
			1614.73		4473.58	4473.58	5140.13	5905.99	6785.96	7797.05
			1063.1		4893.58	4893.58	5622.71	6460.47	7423.06	8529.06
			1607.81		4568.76	4568.76	5249.49	6031.64	6930.33	7962.93
			1085.49		3134.56	3134.56	3601.6	4138.23	4754.81	5463.26
			740.933		3987.8	3987.8	4581.97	5264.67	6049.08	6950.37
			2314.09		4481.83	4481.83	5149.6	5916.88	6798.47	7811.42
			988.096		4403.32	4403.32	5059.4	5813.23	6679.38	7674.59
			1377.99		4954.93	4954.93	5693.2	6541.47	7516.12	8636
			1628.63		3662.11	3662.11	4207.75	4834.69	5555.05	6382.73
			1786.41		3563.31	3563.31	4094.23	4704.25	5405.17	6210.52
			1802.22		4266.05	4266.05	4901.68	5632.01	6471.16	7435.34
			1468.2		3582.49	3582.49	4116.27	4729.57	5434.26	6243.95
			1213.1		2946.78	2946.78	3385.84	3890.32	4469.96	5135.97
			705.712		1925.25	1925.25	2212.11	2541.7	2920.41	3355.54
			2477.43		3272.14	3272.14	3759.68	4319.86	4963.5	5703.05
			3592.62		2552.03	2552.03	2932.27	3369.17	3871.16	4447.95
			2564.8		2439.73	2439.73	2803.25	3220.92	3700.83	4252.24
			1610.67		2212.23	2212.23	2541.85	2920.58	3355.73	3855.72
			3526.6		2167.91	2167.91	2490.93	2862.06	3288.5	3778.48
			1187.75		2528.83	2528.83	2905.62	3338.55	3835.98	4407.52
			1194.49		1761.89	1761.89	2024.41	2326.04	2672.61	3070.82
			1261.39		1889.13	1889.13	2170.6	2494.01	2865.61	3292.57
			1290.26		2551.33	2551.33	2931.47	3368.25	3870.11	4446.74
			2440.76		2149.27	2149.27	2469.5	2837.45	3260.22	3745.98
			1851.3		2083.13	2083.13	2393.51	2750.13	3159.89	3630.7
			1250.67		1458.75	1458.75	1676.1	1925.84	2212.78	2542.48
			1698.01		1564.29	1564.29	1797.37	2065.17	2372.87	2726.42
			1215.52		1691.32	1691.32	1943.32	2232.87	2565.56	2947.82
			2417.15		1878.79	1878.79	2158.73	2480.37	2849.94	3274.57
			1507.23		2060.89	2060.89	2367.96	2720.78	3126.16	3591.95
			2452.32		3610.37	3610.37	4148.3	4766.38	5476.55	6292.54
			2054.03		2513.94	2513.94	2888.5	3318.88	3813.38	4381.56
			1432.2		2629.27	2629.27	3021.02	3471.14	3988.33	4582.58
			1295.48		1602.98	1602.98	1841.82	2116.25	2431.56	2793.85
			1855.65		2161.84	2161.84	2483.95	2854.05	3279.29	3767.89
			1111.35		2297.78	2297.78	2640.14	3033.51	3485.5	4004.82
			944.287		2109.89	2109.89	2424.25	2785.46	3200.48	3677.34
			2077.96		2442.99	2442.99	2806.99	3225.22	3705.76	4257.91
			2365.84		2759.44	2759.44	3170.59	3643	4185.79	4809.46
			1585.71		2385.41	2385.41	2740.83	3149.2	3618.42	4157.55
			1349.98		1506.49	1506.49	1730.95	1988.85	2285.18	2625.67
			1160.85		2212.89	2212.89	2542.6	2921.44	3356.72	3856.86
			2206.57		2066.83	2066.83	2374.79	2728.62	3135.17	3602.3
			2153.94		2482.16	2482.16	2851.99	3276.92	3765.17	4326.17
			2667.29		1700.25	1700.25	1953.58	2244.66	2579.1	2963.38
			1890.49		3056.21	3056.21	3511.57	4034.78	4635.95	5326.69
			1665.83		2402.05	2402.05	2759.95	3171.17	3643.66	4186.55
			1638		1694.54	1694.54	1947.02	2237.12	2570.45	2953.43
			1179.1		2944.55	2944.55	3383.28	3887.37	4466.58	5132.08
			3223.03		2940.59	2940.59	3378.72	3882.14	4460.57	5125.18
			2877.85		2498.54	2498.54	2870.82	3298.56	3790.03	4354.74
			2119.04		2196.24	2196.24	2523.48	2899.46	3331.47	3827.85
			2352.92		3492.74	3492.74	4013.15	4611.09	5298.13	6087.53
			2416.09		3893.79	3893.79	4473.96	5140.56	5906.48	6786.53
			3256.13		3103.13	3103.13	3565.49	4096.73	4707.13	5408.48
			1634.97		2724.47	2724.47	3130.41	3596.83	4132.75	4748.51
			2519.3		4304.11	4304.11	4945.41	5682.26	6528.9	7501.68
			941.162		2375.76	2375.76	2729.74	3136.47	3603.79	4140.74
			1634.24		1421.24	1421.24	1633	1876.31	2155.87	2477.09
			2426.08		2718.36	2718.36	3123.39	3588.76	4123.47	4737.85
			2013.37		1802.68	1802.68	2071.27	2379.89	2734.48	3141.91
			2417.02		1928.86	1928.86	2216.26	2546.47	2925.89	3361.83
			3989.28		2675.75	2675.75	3074.42	3532.5	4058.83	4663.58
			2355.7		2605.15	2605.15	2993.3	3439.3	3951.74	4540.53
			1799.55		2596.53	2596.53	2983.4	3427.91	3938.66	4525.51
			687.948		1803.62	1803.62	2072.36	2381.13	2735.91	3143.55
			1602.33		2696.78	2696.78	3098.59	3560.27	4090.73	4700.24
			999.685		1952.04	1952.04	2242.89	2577.07	2961.04	3402.23
			1296.83		2939.37	2939.37	3377.32	3880.53	4458.72	5123.05
			1812.47		1761.33	1761.33	2023.76	2325.29	2671.75	3069.84
			2377.11		1585.08	1585.08	1821.25	2092.61	2404.4	2762.65
			1886.8		2875.56	2875.56	3304.01	3796.29	4361.93	5011.84
			815.366		2734.49	2734.49	3141.91	3610.05	4147.93	4765.96
			1236.36		2936.62	2936.62	3374.17	3876.91	4454.55	5118.26
			1764.94		2587.33	2587.33	2972.83	3415.77	3924.71	4509.48
			2400.63		2817.17	2817.17	3236.92	3719.21	4273.36	4910.07
			2122.75		2422.81	2422.81	2783.8	3198.57	3675.15	4222.73
			1055.94		2258.56	2258.56	2595.07	2981.73	3426	3936.46
			1063.77		2382.46	2382.46	2737.44	3145.31	3613.95	4152.41
			1189.68		2923.25	2923.25	3358.81	3859.26	4434.28	5094.97
			1240.45		1989.26	1989.26	2285.66	2626.21	3017.51	3467.11
			1951.32		3366.96	3366.96	3868.62	4445.03	5107.33	5868.3
			2576.53		2674.05	2674.05	3072.48	3530.27	4056.26	4660.63
			1876.92		2456.73	2456.73	2822.77	3243.35	3726.6	4281.85
			1181.44		2975.97	2975.97	3419.38	3928.85	4514.24	5186.84
			2382.4		1771.22	1771.22	2035.12	2338.35	2686.75	3087.07
			2286.65		1830.59	1830.59	2103.34	2416.73	2776.82	3190.55
			1077.98		1836.45	1836.45	2110.08	2424.47	2785.71	3200.77
			2287.26		2517.98	2517.98	2893.15	3324.21	3819.51	4388.6
			3528.12		1449.79	1449.79	1665.8	1914	2199.18	2526.85
			1439.93		1922.97	1922.97	2209.49	2538.69	2916.95	3351.56
			1782.99		1567.02	1567.02	1800.5	2068.77	2377.01	2731.17
			1796.69		2024.07	2024.07	2325.65	2672.17	3070.31	3527.78
			2296.58		1468.1	1468.1	1686.84	1938.17	2226.95	2558.76
			1152.45		1512.58	1512.58	1737.95	1996.9	2294.43	2636.29
			1359.32		1784.18	1784.18	2050.01	2355.46	2706.41	3109.66
			2482.65		1782.54	1782.54	2048.13	2353.29	2703.93	3106.8
			1354.53		2021.2	2021.2	2322.35	2668.37	3065.95	3522.76
			1961.15		1411.22	1411.22	1621.48	1863.08	2140.67	2459.62
			1026.61		1630.17	1630.17	1873.06	2152.14	2472.8	2841.24
			1674.38		2148	2148	2468.05	2835.78	3258.3	3743.77
			2170.27		3383.6	3383.6	3887.75	4467.01	5132.58	5897.31
			1736.71		4228.4	4228.4	4858.42	5582.31	6414.05	7369.72
			2582.66		4324.03	4324.03	4968.3	5708.56	6559.11	7536.4
			1772.3		4530.78	4530.78	5205.85	5981.5	6872.72	7896.73
			1083.31		4756.43	4756.43	5465.12	6279.41	7215.02	8290.03
			3083.01		4100.67	4100.67	4711.65	5413.67	6220.29	7147.09
			1764.31		3371.55	3371.55	3873.89	4451.09	5114.29	5876.3
			3542.29		2821.39	2821.39	3241.77	3724.78	4279.76	4917.43
			1717.16		3056.83	3056.83	3512.29	4035.61	4636.9	5327.78
			1856.07		1736.08	1736.08	1994.75	2291.96	2633.45	3025.83
			1943.64		2909.01	2909.01	3342.44	3840.45	4412.66	5070.13
			3077.24		3461.8	3461.8	3977.59	4570.24	5251.19	6033.6
			2685.97		2290.15	2290.15	2631.38	3023.44	3473.92	3991.52
			2422.15		3253.09	3253.09	3737.79	4294.71	4934.6	5669.84
			1489.55		3196.29	3196.29	3672.52	4219.71	4848.44	5570.84
			1235.33		2391.13	2391.13	2747.4	3156.75	3627.1	4167.52
			1057.63		3403.14	3403.14	3910.2	4492.81	5162.22	5931.37
			2134.53		2406.51	2406.51	2765.07	3177.05	3650.42	4194.32
			1350.12		3971.35	3971.35	4563.07	5242.95	6024.14	6921.71
			1145.46		3180.08	3180.08	3653.9	4198.32	4823.86	5542.59
			1661.7		3510.53	3510.53	4033.58	4634.57	5325.11	6118.53
			3922.5		3561.22	3561.22	4091.83	4701.5	5402.01	6206.89
			2308.84		2655.48	2655.48	3051.13	3505.74	4028.09	4628.26
			2198.93		3261.66	3261.66	3747.63	4306.01	4947.59	5684.77
			3719.84		3022.84	3022.84	3473.23	3990.73	4585.34	5268.54
			2416.5		3781.61	3781.61	4345.06	4992.45	5736.31	6591
			2086.42		2523.75	2523.75	2899.78	3331.84	3828.27	4398.67
			2284.37		3288.31	3288.31	3778.26	4341.21	4988.03	5731.23
			1516.34		2346.49	2346.49	2696.11	3097.82	3559.39	4089.73
			2159.63		3093.34	3093.34	3554.23	4083.8	4692.27	5391.4
			1732.18		2063.07	2063.07	2370.46	2723.65	3129.47	3595.75
			3572.7		3335.44	3335.44	3832.4	4403.42	5059.51	5813.36
			1092.88		3409.74	3409.74	3917.78	4501.52	5172.23	5942.87
			2112.38		3295.96	3295.96	3787.05	4351.3	4999.63	5744.56
			2097.23		3685.98	3685.98	4235.18	4866.2	5591.25	6424.33
			1332.58		2820.3	2820.3	3240.52	3723.34	4278.11	4915.53
			2526.22		1995.12	1995.12	2292.38	2633.94	3026.38	3477.3
			2686.46		2065.28	2065.28	2373	2726.57	3132.82	3599.6
			1730.29		2505.54	2505.54	2878.86	3307.8	3800.65	4366.94
			1889.41		3564.27	3564.27	4095.33	4705.52	5406.63	6212.2
			1919.37		2962.8	2962.8	3404.25	3911.47	4494.27	5163.89
			2613.14		3966.62	3966.62	4557.64	5236.71	6016.96	6913.46
			2177.69		2537.87	2537.87	2916	3350.48	3849.69	4423.27
			1397.65		3086.71	3086.71	3546.62	4075.05	4682.22	5379.85
			1667.66		3630.76	3630.76	4171.72	4793.3	5507.48	6328.08
			2284.19		3056.71	3056.71	3512.15	4035.44	4636.71	5327.57
			3439.04		3395.97	3395.97	3901.96	4483.33	5151.34	5918.87
			1412.64		2845.89	2845.89	3269.91	3757.12	4316.92	4960.12
			1886.19		2559.39	2559.39	2940.73	3378.89	3882.33	4460.79
			1401.07		2045.69	2045.69	2350.49	2700.71	3103.1	3565.46
			1153.17		2408.47	2408.47	2767.32	3179.64	3653.4	4197.74
			1598.9		1644.07	1644.07	1889.03	2170.49	2493.89	2865.47
			2021.37		2402.13	2402.13	2760.04	3171.28	3643.79	4186.7
			2193.34		2047.3	2047.3	2352.34	2702.83	3105.55	3568.26
			1738.82		2514.96	2514.96	2889.68	3320.24	3814.94	4383.35
			1721.56		2395.21	2395.21	2752.09	3162.14	3633.29	4174.64
			1799.65		1716.93	1716.93	1972.75	2266.68	2604.41	2992.46
			2876.26		2695.6	2695.6	3097.23	3558.71	4088.95	4698.19
			2574.04		1980.73	1980.73	2275.85	2614.94	3004.56	3452.23
			1677.53		1827.34	1827.34	2099.61	2412.44	2771.89	3184.89
			1031.44		1624.25	1624.25	1866.26	2144.33	2463.82	2830.92
			3312.55		2271.23	2271.23	2609.64	2998.46	3445.22	3958.55
			2087.47		1568.07	1568.07	1801.7	2070.15	2378.59	2733
			1124.94		1386.34	1386.34	1592.9	1830.24	2102.94	2416.27
			1618.81		1805.93	1805.93	2075.01	2384.18	2739.41	3147.58
			943.243		3020.23	3020.23	3470.24	3987.29	4581.38	5263.99
			2047.76		3942.41	3942.41	4529.82	5204.75	5980.23	6871.27
			994.906		3667.41	3667.41	4213.84	4841.69	5563.09	6391.97
			2086.43		3688.58	3688.58	4238.16	4869.63	5595.19	6428.85
			1988.81		3374.82	3374.82	3877.65	4455.41	5119.25	5882
			2436.41		3347.65	3347.65	3846.44	4419.54	5078.04	5834.65
			1475.06		3287.8	3287.8	3777.67	4340.53	4987.25	5730.33
			1848.37		3430.03	3430.03	3941.09	4528.3	5203	5978.23
			2611.24		2720.16	2720.16	3125.46	3591.14	4126.21	4741
			1560.24		3673.19	3673.19	4220.48	4849.32	5571.85	6402.04
			1149.06		3705.19	3705.19	4257.25	4891.56	5620.39	6457.81
			2036.14		3904.27	3904.27	4485.99	5154.39	5922.37	6804.79
			2563.54		3711.8	3711.8	4264.85	4900.29	5630.42	6469.33
			2492.74		2477.7	2477.7	2846.87	3271.04	3758.41	4318.4
			1535.41		2274.05	2274.05	2612.88	3002.19	3449.5	3963.47
			970.512		1266.41	1266.41	1455.1	1671.9	1921.01	2207.24
			2350.87		1813.61	1813.61	2083.83	2394.31	2751.06	3160.95
			2101.08		1856.04	1856.04	2132.58	2450.33	2815.42	3234.91
			1230.4		2284.58	2284.58	2624.97	3016.09	3465.47	3981.82
			1917.56		2594.9	2594.9	2981.53	3425.77	3936.2	4522.68
			1655.8		2240.06	2240.06	2573.82	2957.31	3397.94	3904.22
			2523.18		2864.31	2864.31	3291.09	3781.45	4344.87	4992.24
			1996.63		1556.74	1556.74	1788.68	2055.19	2361.41	2713.25
			1871.31		1703.99	1703.99	1957.88	2249.6	2584.78	2969.9
			2587.24		1913.52	1913.52	2198.62	2526.21	2902.61	3335.09
			2336.12		2135.46	2135.46	2453.64	2819.23	3239.28	3721.92
			2701.26		2036.95	2036.95	2340.45	2689.17	3089.85	3550.23
			2925.09		2137.85	2137.85	2456.38	2822.37	3242.9	3726.08
			2459.94		1711.34	1711.34	1966.33	2259.3	2595.93	2982.72
			1904.8		1623.95	1623.95	1865.92	2143.93	2463.37	2830.4
			2951.5		2079.79	2079.79	2389.68	2745.73	3154.83	3624.89
			1345.7		2035.19	2035.19	2338.43	2686.85	3087.18	3547.15
			1056.8		3186.19	3186.19	3660.92	4206.38	4833.12	5553.23
			1782.05		2253.14	2253.14	2588.85	2974.58	3417.78	3927.01
			2712.03		2232.54	2232.54	2565.18	2947.38	3386.53	3891.11
			2189.38		1577.67	1577.67	1812.73	2082.82	2393.16	2749.73
			2684.68		2009.34	2009.34	2308.73	2652.72	3047.97	3502.1
			1956.32		2102.34	2102.34	2415.58	2775.49	3189.03	3664.19
			2011.37		2015.41	2015.41	2315.7	2660.73	3057.17	3512.68
			1396.36		2154.86	2154.86	2475.93	2844.83	3268.7	3755.73
			2548.38		2209.25	2209.25	2538.41	2916.63	3351.2	3850.51
			1009.25		3012.84	3012.84	3461.74	3977.53	4570.17	5251.11
			1295.83		3597.83	3597.83	4133.89	4749.83	5457.53	6270.69
			3139.98		3081.79	3081.79	3540.97	4068.56	4674.76	5371.28
			3027.68		3928.24	3928.24	4513.54	5186.04	5958.74	6846.57
			1732.23		5006.24	5006.24	5752.15	6609.2	7593.94	8725.41
			2754.08		2354.61	2354.61	2705.44	3108.54	3571.7	4103.88
			1166.31		1932.43	1932.43	2220.35	2551.18	2931.29	3368.04
			1518.59		2036.82	2036.82	2340.3	2689	3089.65	3550
			1326.74		1558.38	1558.38	1790.57	2057.36	2363.9	2716.11
			1768.79		3525.11	3525.11	4050.34	4653.83	5347.23	6143.95
			3741.91		2067.26	2067.26	2375.27	2729.18	3135.81	3603.04
			2077.26		2975.33	2975.33	3418.64	3928	4513.26	5185.72
			1430.58		3967.95	3967.95	4559.16	5238.46	6018.97	6915.77
			2011.27		4159.37	4159.37	4779.1	5491.16	6309.33	7249.4
			946.424		2756.43	2756.43	3167.13	3639.02	4181.22	4804.21
			3064.49		4891.9	4891.9	5620.78	6458.25	7420.51	8526.14
			2835.42		5053.2	5053.2	5806.1	6671.19	7665.18	8807.26
			2411.22		3610.26	3610.26	4148.17	4766.24	5476.39	6292.35
			1436.41		4257.92	4257.92	4892.34	5621.28	6458.83	7421.17
			1928.75		2965.36	2965.36	3407.18	3914.84	4498.14	5168.35
			1850.03		4020.97	4020.97	4620.08	5308.45	6099.4	7008.18
			932.022		3355.29	3355.29	3855.22	4429.63	5089.63	5847.97
			1745.63		3337.99	3337.99	3835.34	4406.79	5063.38	5817.81
			2615.46		2147.43	2147.43	2467.39	2835.02	3257.43	3742.78
			1974.86		3136.96	3136.96	3604.36	4141.39	4758.45	5467.44
			1407.54		2683.98	2683.98	3083.88	3543.37	4071.32	4677.93
			1381.3		2926.91	2926.91	3363	3864.08	4439.81	5101.33
			1527.52		2843.9	2843.9	3267.63	3754.49	4313.9	4956.66
			2038.77		1908.96	1908.96	2193.39	2520.19	2895.69	3327.14
			1107.28		1192.62	1192.62	1370.31	1574.48	1809.08	2078.62
			1673.35		2278.48	2278.48	2617.96	3008.03	3456.22	3971.18
			1354.53		1928.18	1928.18	2215.48	2545.58	2924.86	3360.65
			1568.66		2636.71	2636.71	3029.57	3480.97	3999.62	4595.55
			2127.85		1454.6	1454.6	1671.33	1920.35	2206.48	2535.24
			1180.88		2010.87	2010.87	2310.48	2654.74	3050.28	3504.77
			1584.63		2174.4	2174.4	2498.37	2870.62	3298.33	3789.77
			1979.96		2063.11	2063.11	2370.51	2723.71	3129.53	3595.82
			2227.71		2654.91	2654.91	3050.48	3504.99	4027.22	4627.26
			1602.86		3032.93	3032.93	3484.82	4004.05	4600.64	5286.12
			1599.35		2002.23	2002.23	2300.56	2643.33	3037.18	3489.71
			1458.11		2091.04	2091.04	2402.59	2760.57	3171.89	3644.49
			1926.36		1673.02	1673.02	1922.3	2208.71	2537.8	2915.92
			1811.67		2944.98	2944.98	3383.77	3887.94	4467.23	5132.83
			2960.43		1942.21	1942.21	2231.6	2564.1	2946.14	3385.1
			2385.17		2293.62	2293.62	2635.36	3028.02	3479.18	3997.56
			1615.72		1271	1271	1460.38	1677.97	1927.98	2215.24
			1714.66		4533.34	4533.34	5208.79	5984.88	6876.6	7901.19
			1371.98		4379.3	4379.3	5031.79	5781.51	6642.94	7632.71
			1639.62		3231.21	3231.21	3712.65	4265.82	4901.41	5631.7
			2106.18		4672.04	4672.04	5368.16	6167.99	7087	8142.94
			4940.37		4461.76	4461.76	5126.54	5890.38	6768.02	7776.43
			2391.55		3552.79	3552.79	4082.15	4690.37	5389.22	6192.2
			1490.56		3787.29	3787.29	4351.58	4999.95	5744.92	6600.9
			1183.55		3484.61	3484.61	4003.8	4600.35	5285.79	6073.35
			2697.27		4807.17	4807.17	5523.42	6346.39	7291.98	8378.45
			2664.18		3502.24	3502.24	4024.06	4623.63	5312.53	6104.08
			1656.67		2995.71	2995.71	3442.06	3954.92	4544.19	5221.25
			1643.08		2773.41	2773.41	3186.63	3661.43	4206.97	4833.79
			1717.26		3738.94	3738.94	4296.03	4936.12	5671.59	6516.63
			972.301		3718.37	3718.37	4272.39	4908.96	5640.38	6480.77
			1311.24		3116.41	3116.41	3580.74	4114.26	4727.27	5431.62
			1066.22		4739.6	4739.6	5445.78	6257.19	7189.48	8260.69
			1397.63		2603.9	2603.9	2991.87	3437.65	3949.84	4538.36
			1229.02		2806.38	2806.38	3224.52	3704.96	4256.99	4891.26
			1136.81		4236.76	4236.76	4868.02	5593.34	6426.73	7384.29
			1966.15		2876.36	2876.36	3304.92	3797.34	4363.14	5013.23
			1800.3		2293.45	2293.45	2635.17	3027.8	3478.93	3997.28
			1019.72		2879.45	2879.45	3308.48	3801.43	4367.83	5018.62
			3694.63		1903.52	1903.52	2187.14	2513.02	2887.45	3317.67
			2198.39		2992.24	2992.24	3438.07	3950.33	4538.91	5215.19
			2471.25		5034.06	5034.06	5784.11	6645.93	7636.15	8773.9
			1625.52		2785.67	2785.67	3200.73	3677.62	4225.58	4855.17
			1375.56		3634.74	3634.74	4176.3	4798.55	5513.52	6335.01
			1632.61		2492.68	2492.68	2864.08	3290.82	3781.14	4344.52
			2321.55		3954.47	3954.47	4543.67	5220.66	5998.52	6892.27
			2021.64		3921.5	3921.5	4505.78	5177.13	5948.5	6834.81
			1762.12		3284.03	3284.03	3773.34	4335.55	4981.53	5723.76
			1216.37		3400.04	3400.04	3906.64	4488.71	5157.51	5925.96
			2811.55		2221.33	2221.33	2552.31	2932.59	3369.53	3871.58
			1260.7		1863.78	1863.78	2141.48	2460.55	2827.17	3248.4
			1623.15		1384.39	1384.39	1590.66	1827.66	2099.98	2412.86
			1127.82		2448.09	2448.09	2812.85	3231.95	3713.5	4266.8
			1376.84		1915.36	1915.36	2200.74	2528.64	2905.4	3338.29
			1533.36		1504.13	1504.13	1728.24	1985.74	2281.61	2621.56
			1736.82		1976.54	1976.54	2271.04	2609.41	2998.21	3444.93
			3966.64		1442.05	1442.05	1656.91	1903.79	2187.45	2513.37
			2459.17		2496.97	2496.97	2869.01	3296.49	3787.65	4352
			978.159		1838.54	1838.54	2112.47	2427.23	2788.87	3204.41
			1678.93		1601.76	1601.76	1840.41	2114.63	2429.7	2791.72
			2346.66		2420.16	2420.16	2780.76	3195.08	3671.14	4218.13
			1420.89		2133.1	2133.1	2450.93	2816.11	3235.69	3717.8
			1571.74		2708.69	2708.69	3112.27	3575.99	4108.8	4720.99
			1948.89		3552.53	3552.53	4081.84	4690.02	5388.82	6191.73
			1777.56		2144.6	2144.6	2464.14	2831.28	3253.14	3737.84
			975.217		2599.21	2599.21	2986.48	3431.45	3942.73	4530.18
			934.225		3125.31	3125.31	3590.98	4126.02	4740.78	5447.14
			1547.44		2292.91	2292.91	2634.54	3027.08	3478.11	3996.33
			1335.33		3425.45	3425.45	3935.83	4522.25	5196.05	5970.24
			2517.61		4201.22	4201.22	4827.18	5546.41	6372.81	7322.34
			1461.22		1937.11	1937.11	2225.73	2557.35	2938.39	3376.2
			3106.1		1824.69	1824.69	2096.56	2408.94	2767.86	3180.26
			2499.64		2379.74	2379.74	2734.31	3141.71	3609.82	4147.67
			1836.89		2531.7	2531.7	2908.92	3342.33	3840.33	4412.53
			1537.92		1593.99	1593.99	1831.48	2104.37	2417.91	2778.17
			3674.32		2517.21	2517.21	2892.27	3323.2	3818.35	4387.27
			1695.66		2483.47	2483.47	2853.5	3278.66	3767.17	4328.47
			1306.22		2331.61	2331.61	2679.01	3078.17	3536.81	4063.78
			1731.42		2627.59	2627.59	3019.09	3468.92	3985.78	4579.65
			1815.56		4625.6	4625.6	5314.8	6106.68	7016.56	8062
			2120.73		5639.95	5639.95	6480.29	7445.83	8555.23	9829.93
			1015.03		5230.09	5230.09	6009.36	6904.73	7933.51	9115.58
			1296.62		4184.89	4184.89	4808.43	5524.86	6348.05	7293.88
			1858.49		4386.2	4386.2	5039.72	5790.62	6653.41	7644.74
			1414.76		4545.79	4545.79	5223.1	6001.32	6895.5	7922.9
			2228.65		1869.6	1869.6	2148.17	2468.24	2835.99	3258.55
			2185.28		2844	2844	3267.74	3754.62	4314.05	4956.83
			951.974		2185.74	2185.74	2511.41	2885.6	3315.55	3809.55
			1000.6		1856.08	1856.08	2132.63	2450.38	2815.48	3234.98
			2407.24		2187.98	2187.98	2513.98	2888.56	3318.94	3813.45
			2961.8		2113.06	2113.06	2427.9	2789.65	3205.3	3682.88
			1642.97		3551.88	3551.88	4081.1	4689.17	5387.84	6190.61
			2487.59		2208.11	2208.11	2537.11	2915.13	3349.48	3848.54
			1130.07		2322.96	2322.96	2669.08	3066.76	3523.7	4048.72
			874.779		1726.05	1726.05	1983.22	2278.72	2618.24	3008.35
			1348.8		2312.37	2312.37	2656.9	3052.77	3507.62	4030.24
			891.665		1820.88	1820.88	2092.18	2403.91	2762.08	3173.62
			2591.94		1560.51	1560.51	1793.03	2060.18	2367.14	2719.84
			1871.72		2248.2	2248.2	2583.17	2968.06	3410.29	3918.41
			2126.55		2273.01	2273.01	2611.68	3000.82	3447.93	3961.66
			1346.13		1269.08	1269.08	1458.17	1675.43	1925.07	2211.9
			1134.47		1543.76	1543.76	1773.77	2038.06	2341.72	2690.63
			1657.33		1833.1	1833.1	2106.23	2420.05	2780.62	3194.93
			3005.39		2522.57	2522.57	2898.42	3330.27	3826.47	4396.6
			1339.23		2495.7	2495.7	2867.55	3294.8	3785.72	4349.78
			1784.8		2374.18	2374.18	2727.93	3134.38	3601.39	4137.99
			2838.11		2581.16	2581.16	2965.74	3407.63	3915.35	4498.72
			1769.8		3485.91	3485.91	4005.3	4602.08	5287.77	6075.63
			2100.54		2850.6	2850.6	3275.33	3763.34	4324.07	4968.34
			1415.41		2802.07	2802.07	3219.57	3699.27	4250.45	4883.75
			1954.64		3204.34	3204.34	3681.77	4230.35	4860.65	5584.87
			1348.04		3069.03	3069.03	3526.3	4051.71	4655.4	5349.04
			1238.12		2426.81	2426.81	2788.39	3203.86	3681.22	4229.71
			998.441		2982.45	2982.45	3426.83	3937.41	4524.08	5198.15
			1677.34		1462.46	1462.46	1680.37	1930.73	2218.41	2548.94
			2124.05		1599.38	1599.38	1837.68	2111.49	2426.09	2787.57
			2251.12		2592.06	2592.06	2978.27	3422.02	3931.89	4517.72
			1838.98		1562.26	1562.26	1795.03	2062.49	2369.79	2722.88
			1421.31		1319.34	1319.34	1515.92	1741.78	2001.3	2299.49
			1128.12		1793.75	1793.75	2061.01	2368.09	2720.93	3126.34
			1874.01		2057.87	2057.87	2364.48	2716.78	3121.57	3586.68
			1365.64		1193.76	1193.76	1371.62	1575.99	1810.81	2080.61
			1138.99		2025.89	2025.89	2327.74	2674.56	3073.06	3530.94
			2430.35		2305.61	2305.61	2649.14	3043.85	3497.38	4018.47
			1243.07		2722.59	2722.59	3128.24	3594.34	4129.88	4745.22
			2414.46		2254.17	2254.17	2590.04	2975.94	3419.35	3928.82
			1860.05		3419.46	3419.46	3928.95	4514.34	5186.97	5959.81
			2178		2425.82	2425.82	2787.26	3202.55	3679.71	4227.98
			1351.22		2997.75	2997.75	3444.4	3957.6	4547.27	5224.8
			1815.73		3112.21	3112.21	3575.92	4108.72	4720.9	5424.3
			1436.51		3756.42	3756.42	4316.12	4959.2	5698.11	6547.11
			1885.21		3060.51	3060.51	3516.51	4040.46	4642.48	5334.19
			1749.18		2819.6	2819.6	3239.71	3722.41	4277.04	4914.3
			2225.68		2889.91	2889.91	3320.5	3815.24	4383.69	5036.85
			5321.71		2967.44	2967.44	3409.58	3917.59	4501.3	5171.97
			1182.88		2208.86	2208.86	2537.97	2916.12	3350.61	3849.84
			1403.56		2364.7	2364.7	2717.03	3121.85	3587	4121.45
			2959.31		1449.77	1449.77	1665.78	1913.97	2199.15	2526.81
			818.927		1305.85	1305.85	1500.42	1723.97	1980.84	2275.98
			1173.95		1892.2	1892.2	2174.13	2498.07	2870.27	3297.94
			1471.38		1611.93	1611.93	1852.1	2128.06	2445.13	2809.45
			905.19		1723.26	1723.26	1980.02	2275.04	2614.01	3003.49
			1361.19		2386.09	2386.09	2741.61	3150.1	3619.46	4158.74
			2207.45		1279.59	1279.59	1470.25	1689.31	1941.01	2230.22
			1931.43		1819.02	1819.02	2090.05	2401.46	2759.27	3170.39
			1717.54		1486.23	1486.23	1707.67	1962.11	2254.46	2590.36
			1774.29		1604.47	1604.47	1843.53	2118.21	2433.82	2796.45
			1815.96		2001.13	2001.13	2299.3	2641.88	3035.51	3487.8
			2699.33		2095.13	2095.13	2407.3	2765.98	3178.1	3651.63
			2150.79		1943.69	1943.69	2233.3	2566.05	2948.38	3387.68
			1716.1		1984.98	1984.98	2280.73	2620.55	3011	3459.63
			1305.72		1562.53	1562.53	1795.34	2062.84	2370.19	2723.34
			1246.41		1647.73	1647.73	1893.24	2175.32	2499.44	2871.85
			3114.2		1738.94	1738.94	1998.03	2295.73	2637.79	3030.81
			1687.61		1939.87	1939.87	2228.9	2561	2942.58	3381.01
			2316.71		1843.51	1843.51	2118.19	2433.79	2796.42	3213.08
			1749.27		1828.27	1828.27	2100.67	2413.67	2773.29	3186.5
			2281.62		1559.81	1559.81	1792.22	2059.25	2366.07	2718.61
			2332.04		1511.57	1511.57	1736.79	1995.56	2292.9	2634.53
			2379.91		1705.83	1705.83	1960	2252.03	2587.58	2973.12
			1965.52		1833	1833	2106.11	2419.92	2780.48	3194.76
			2516.81		2269.68	2269.68	2607.86	2996.42	3442.87	3955.85
			1864.34		1970.4	1970.4	2263.98	2601.3	2988.89	3434.22
			2643.8		2279.84	2279.84	2619.53	3009.83	3458.29	3973.56
			1557.72		1541.28	1541.28	1770.92	2034.79	2337.96	2686.31
			3815.51		1558.39	1558.39	1790.58	2057.37	2363.91	2716.13
			2084.01		1877.47	1877.47	2157.2	2478.62	2847.92	3272.25
			1233.68		1764.75	1764.75	2027.69	2329.81	2676.95	3075.8
			1277.85		1728.59	1728.59	1986.14	2282.07	2622.09	3012.77
			1031.52		1774.68	1774.68	2039.1	2342.92	2692.01	3093.11
			1264.87		1312.25	1312.25	1507.77	1732.42	1990.55	2287.13
			1230.66		1868.25	1868.25	2146.62	2466.45	2833.95	3256.19
			1348.32		1684.21	1684.21	1935.15	2223.48	2554.78	2935.43
			1688.53		1625.99	1625.99	1868.26	2146.62	2466.46	2833.96
			2281.54		1641.02	1641.02	1885.53	2166.46	2489.26	2860.15
			21969.2		2244.16	2244.16	2578.53	2962.73	3404.16	3911.37
			1597.53		2052.18	2052.18	2357.94	2709.27	3112.94	3576.76
			2239.31		2057.82	2057.82	2364.43	2716.72	3121.5	3586.59
			1607.79		1438.44	1438.44	1652.77	1899.02	2181.97	2507.08
			1887.51		2194.54	2194.54	2521.51	2897.21	3328.88	3824.88
			1577.03		3551.92	3551.92	4081.14	4689.22	5387.9	6190.67
			1159.86		2378.12	2378.12	2732.46	3139.58	3607.37	4144.85
			1498.37		3113.97	3113.97	3577.94	4111.04	4723.57	5427.37
			2678.82		2593.38	2593.38	2979.78	3423.76	3933.89	4520.03
			2453.51		3152.33	3152.33	3622.02	4161.69	4781.76	5494.23
			2106.08		2243.29	2243.29	2577.54	2961.58	3402.84	3909.86
			1620.3		2294.72	2294.72	2636.63	3029.47	3480.86	3999.49
			2214.37		2931.29	2931.29	3368.05	3869.87	4446.47	5108.98
			817.144		3514.97	3514.97	4038.69	4640.44	5331.85	6126.28
			2034.39		2183.49	2183.49	2508.82	2882.62	3312.12	3805.62
			2322.4		2566.52	2566.52	2948.92	3388.3	3893.14	4473.2
			1603.45		3390.12	3390.12	3895.24	4475.62	5142.47	5908.68
			1277.65		3425.14	3425.14	3935.47	4521.84	5195.58	5969.7
			1987.75		5926.27	5926.27	6809.26	7823.82	8989.54	10328.9
			2264.24		4569.45	4569.45	5250.29	6032.56	6931.39	7964.14
			1919.92		5000.87	5000.87	5745.98	6602.11	7585.8	8716.06
			1694.57		4830.35	4830.35	5550.05	6376.99	7327.14	8418.85
			1447.86		3879.59	3879.59	4457.63	5121.8	5884.93	6761.76
			1699.32		2493.84	2493.84	2865.41	3292.35	3782.9	4346.53
			2265.8		3840.43	3840.43	4412.65	5070.11	5825.54	6693.53
			1550.43		2277.63	2277.63	2616.99	3006.92	3454.94	3969.71
			2076.3		2176.4	2176.4	2500.67	2873.26	3301.37	3793.26
			1817.43		3317.31	3317.31	3811.58	4379.49	5032.02	5781.77
			2863.6		3843.97	3843.97	4416.71	5074.78	5830.9	6699.69
			2546.45		3887.59	3887.59	4466.83	5132.37	5897.07	6775.72
			1963.04		2318.69	2318.69	2664.17	3061.12	3517.22	4041.27
			2886.51		2187.2	2187.2	2513.08	2887.52	3317.75	3812.09
			2413.21		2208.36	2208.36	2537.4	2915.47	3349.86	3848.98
			1614.31		2815.98	2815.98	3235.55	3717.63	4271.55	4907.99
			1058.46		4666.58	4666.58	5361.88	6160.78	7078.71	8133.42
			1767.09		2377	2377	2731.17	3138.1	3605.67	4142.9
			1051.21		3047.1	3047.1	3501.11	4022.76	4622.14	5310.82
			1770.55		3732.45	3732.45	4288.57	4927.55	5661.74	6505.32
			1571.61		3953.58	3953.58	4542.64	5219.48	5997.17	6890.72
			4132.52		3600.44	3600.44	4136.9	4753.28	5461.5	6275.25
			1302.57		4396.39	4396.39	5051.44	5804.09	6668.88	7662.52
			1331.51		4369.51	4369.51	5020.56	5768.6	6628.1	7615.67
			1231.96		3516.13	3516.13	4040.02	4641.97	5333.61	6128.29
			1426.28		3357.02	3357.02	3857.2	4431.91	5092.25	5850.98
			1997.5		2443.89	2443.89	2808.02	3226.4	3707.12	4259.47
			5554.53		3459.43	3459.43	3974.87	4567.11	5247.6	6029.47
			1880.99		2336.63	2336.63	2684.78	3084.8	3544.42	4072.53
			1442.77		3474.34	3474.34	3992	4586.8	5270.21	6055.46
			1790.03		4202.09	4202.09	4828.19	5547.57	6374.14	7323.86
			1413.76		3838.46	3838.46	4410.38	5067.51	5822.55	6690.09
			1839.42		3608.53	3608.53	4146.19	4763.96	5473.77	6289.34
			668.565		3682.03	3682.03	4230.64	4860.99	5585.26	6417.45
			1750.72		2964.58	2964.58	3406.29	3913.82	4496.97	5167
			1683.26		2033.58	2033.58	2336.57	2684.72	3084.73	3544.34
			3403.83		2527.74	2527.74	2904.37	3337.11	3834.33	4405.63
			2164.21		2930.49	2930.49	3367.12	3868.81	4445.25	5107.58
			2134.89		2258.85	2258.85	2595.41	2982.11	3426.44	3936.96
			1390.11		1879.61	1879.61	2159.66	2481.45	2851.17	3275.99
			2267.53		3460.12	3460.12	3975.67	4568.03	5248.65	6030.68
			927.341		3296.37	3296.37	3787.52	4351.84	5000.25	5745.27
			2598.21		1997.97	1997.97	2295.66	2637.7	3030.71	3482.28
			1695.57		2403.04	2403.04	2761.09	3172.48	3645.17	4188.29
			2902.5		2311.75	2311.75	2656.2	3051.96	3506.69	4029.18
			1621.14		2174.71	2174.71	2498.73	2871.03	3298.8	3790.31
			5180.21		1570.77	1570.77	1804.81	2073.72	2382.7	2737.72
			3364.22		3017.41	3017.41	3466.99	3983.56	4577.09	5259.06
			1126.22		3628.19	3628.19	4168.78	4789.91	5503.59	6323.61
			2732.73		2597.19	2597.19	2984.16	3428.79	3939.67	4526.66
			1016.49		3642.24	3642.24	4184.92	4808.46	5524.91	6348.1
			1557.49		2319.46	2319.46	2665.06	3062.14	3518.39	4042.61
			1567.72		3129.81	3129.81	3596.15	4131.96	4747.61	5454.98
			1832.87		2267.43	2267.43	2605.27	2993.45	3439.46	3951.93
			1082.41		2863.79	2863.79	3290.49	3780.76	4344.08	4991.33
			1034.64		2344.81	2344.81	2694.18	3095.61	3556.84	4086.8
			1638.13		2200.33	2200.33	2528.17	2904.86	3337.67	3834.97
			1543.12		1921.01	1921.01	2207.23	2536.1	2913.97	3348.14
			1399.03		2484.5	2484.5	2854.68	3280.02	3768.73	4330.26
			1613.14		2568.18	2568.18	2950.83	3390.5	3895.67	4476.11
			1068.32		2650.37	2650.37	3045.27	3499	4020.34	4619.35
			2450.77		3626.61	3626.61	4166.96	4787.82	5501.19	6320.85
			2227.59		3887.49	3887.49	4466.71	5132.23	5896.92	6775.54
			2036.13		3894.43	3894.43	4474.69	5141.4	5907.45	6787.64
			2810.95		3879.06	3879.06	4457.03	5121.11	5884.13	6760.85
			1035.12		4395.35	4395.35	5050.24	5802.71	6667.29	7660.69
			975.354		1592.35	1592.35	1829.6	2102.2	2415.43	2775.32
			1553.68		2728.39	2728.39	3134.91	3602	4138.68	4755.33
			1610.66		1211.78	1211.78	1392.33	1599.78	1838.14	2112.02
			2663.67		2125.92	2125.92	2442.67	2806.62	3224.8	3705.28
			1557.06		1570.58	1570.58	1804.59	2073.47	2382.41	2737.38
			2352.91		1239.67	1239.67	1424.38	1636.61	1880.46	2160.64
			1299.24		1560.37	1560.37	1792.86	2059.99	2366.92	2719.59
			1109.33		1528.79	1528.79	1756.57	2018.3	2319.01	2664.54
			1795.93		1930.37	1930.37	2217.99	2548.46	2928.18	3364.46
			1209.1		2761.02	2761.02	3172.4	3645.08	4188.18	4812.21
			1546.69		1978.42	1978.42	2273.2	2611.9	3001.06	3448.21
			1152.1		1920.86	1920.86	2207.06	2535.91	2913.75	3347.89
			1714.98		2740.18	2740.18	3148.45	3617.56	4156.57	4775.88
			1958.97		1510.69	1510.69	1735.78	1994.4	2291.56	2632.99
			1729.27		2329.45	2329.45	2676.53	3075.32	3533.53	4060.02
			1673.87		1947.47	1947.47	2237.63	2571.03	2954.11	3394.26
			1176.48		2585.87	2585.87	2971.15	3413.84	3922.49	4506.93
			1220.33		1740.53	1740.53	1999.86	2297.84	2640.21	3033.59
			2456.87		1559.63	1559.63	1792.01	2059.01	2365.79	2718.29
			2643.27		2655.98	2655.98	3051.71	3506.41	4028.85	4629.14
			2238.31		2823.27	2823.27	3243.93	3727.26	4282.61	4920.71
			1831.05		2048.78	2048.78	2354.04	2704.78	3107.78	3570.83
			1091.4		1852.48	1852.48	2128.5	2445.64	2810.03	3228.71
			1799.75		1583.75	1583.75	1819.72	2090.85	2402.38	2760.33
			762.861		1660.48	1660.48	1907.89	2192.16	2518.78	2894.07
			1071.37		1577.85	1577.85	1812.95	2083.07	2393.44	2750.06
			1402.56		1847.72	1847.72	2123.02	2439.35	2802.8	3220.41
			1676.99		1637.58	1637.58	1881.57	2161.92	2484.03	2854.15
			1757.92		1849.74	1849.74	2125.34	2442.01	2805.86	3223.93
			1727.91		1335.22	1335.22	1534.16	1762.74	2025.38	2327.16
			2537.45		2126.2	2126.2	2442.99	2806.99	3225.22	3705.77
			1821.22		1377.47	1377.47	1582.71	1818.53	2089.49	2400.81
			2740.52		2418.94	2418.94	2779.35	3193.46	3669.28	4215.99
			1815.48		1483.59	1483.59	1704.65	1958.63	2250.46	2585.77
			2368.59		2263.65	2263.65	2600.93	2988.46	3433.73	3945.34
			1343.99		2684.33	2684.33	3084.29	3543.83	4071.85	4678.54
			6460.34		1726.53	1726.53	1983.78	2279.36	2618.98	3009.19
			2003.79		2663.32	2663.32	3060.15	3516.1	4039.98	4641.93
			2259.23		1854.76	1854.76	2131.12	2448.65	2813.48	3232.68
			1121.26		1851.33	1851.33	2127.17	2444.11	2808.28	3226.7
			1847.55		2081.14	2081.14	2391.22	2747.5	3156.87	3627.24
			1854.3		2366.01	2366.01	2718.54	3123.59	3588.99	4123.74
			1392.62		1842.42	1842.42	2116.94	2432.35	2794.77	3211.18
			1575.7		1941.61	1941.61	2230.9	2563.3	2945.22	3384.05
			1488.93		2027.56	2027.56	2329.66	2676.78	3075.61	3533.86
			1582.18		1494.93	1494.93	1717.67	1973.6	2267.66	2605.53
			2331.27		1341.39	1341.39	1541.25	1770.89	2034.75	2337.92
			1247.37		2143.16	2143.16	2462.48	2829.39	3250.95	3735.34
			1161.52		2419.06	2419.06	2779.49	3193.63	3669.47	4216.2
			2270.55		2584.62	2584.62	2969.72	3412.19	3920.6	4504.75
			5104.74		2295.98	2295.98	2638.07	3031.13	3482.76	4001.68
			1542.94		3156.95	3156.95	3627.32	4167.78	4788.76	5502.27
			1480.45		2781.34	2781.34	3195.75	3671.9	4219	4847.62
			1701.88		2280.6	2280.6	2620.4	3010.83	3459.44	3974.88
			1122.1		3396.56	3396.56	3902.64	4484.12	5152.23	5919.9
			2117.19		1706.23	1706.23	1960.45	2252.55	2588.18	2973.81
			3762.49		4164.85	4164.85	4785.39	5498.4	6317.64	7258.95
			1595.79		2760.17	2760.17	3171.42	3643.95	4186.89	4810.72
			1515.53		1810.84	1810.84	2080.65	2390.66	2746.86	3156.13
			1483.6		2658.76	2658.76	3054.91	3510.08	4033.07	4633.98
			1508.21		3258.23	3258.23	3743.69	4301.49	4942.39	5678.79
			1026.62		2158.03	2158.03	2479.57	2849.02	3273.51	3761.25
			1575		1808.93	1808.93	2078.46	2388.14	2743.96	3152.8
			1181.76		3525.74	3525.74	4051.07	4654.66	5348.19	6145.05
			1267.9		2131.39	2131.39	2448.96	2813.85	3233.1	3714.82
			2084.42		1774.82	1774.82	2039.26	2343.1	2692.22	3093.35
			2354.58		2887.3	2887.3	3317.49	3811.79	4379.73	5032.29
			2168.32		2297.61	2297.61	2639.95	3033.29	3485.24	4004.53
			2145.74		2590.04	2590.04	2975.95	3419.36	3928.83	4514.21
			1391.84		2211.1	2211.1	2540.55	2919.08	3354.01	3853.75
			1141.37		2681.27	2681.27	3080.77	3539.8	4067.22	4673.22
			3567.42		2763.43	2763.43	3175.17	3648.26	4191.84	4816.41
			3599.68		1975.74	1975.74	2270.12	2608.36	2997	3443.54
			1461.65		1597.98	1597.98	1836.08	2109.65	2423.98	2785.14
			3430.9		2700.76	2700.76	3103.16	3565.52	4096.77	4707.18
			3182.61		2895.14	2895.14	3326.5	3822.14	4391.62	5045.96
			2584.1		1905.08	1905.08	2188.93	2515.08	2889.81	3320.38
			1748.58		2779.87	2779.87	3194.07	3669.97	4216.78	4845.07
			803.037		2368.3	2368.3	2721.17	3126.62	3592.47	4127.74
			1060.97		3681.5	3681.5	4230.03	4860.29	5584.45	6416.51
			1964.29		3177.61	3177.61	3651.06	4195.05	4820.1	5538.28
			2076.27		2771.16	2771.16	3184.06	3658.47	4203.57	4829.89
			1942.77		3135.21	3135.21	3602.35	4139.09	4755.79	5464.39
			1057.18		3992.54	3992.54	4587.41	5270.92	6056.27	6958.63
			1314.63		3026.94	3026.94	3477.94	3996.14	4591.55	5275.68
			2654.59		4779.77	4779.77	5491.94	6310.22	7250.42	8330.71
			841.851		3891.4	3891.4	4471.21	5137.4	5902.85	6782.36
			2858.53		2852.36	2852.36	3277.35	3765.67	4326.74	4971.41
			1275.6		2976.02	2976.02	3419.43	3928.92	4514.31	5186.93
			1778.71		3642.61	3642.61	4185.35	4808.95	5525.47	6348.75
			2148.87		2941.38	2941.38	3379.64	3883.19	4461.78	5126.56
			1113.61		2022.55	2022.55	2323.9	2670.16	3068	3525.12
			1283.62		1324.68	1324.68	1522.05	1748.83	2009.4	2308.79
			1310.11		1492.66	1492.66	1715.06	1970.59	2264.2	2601.56
			1222.62		3263.42	3263.42	3749.66	4308.34	4950.27	5687.84
			1418.35		1686.54	1686.54	1937.83	2226.56	2558.31	2939.49
			2703.01		3616.62	3616.62	4155.49	4774.64	5486.04	6303.45
			2355.03		2123.6	2123.6	2440.01	2803.56	3221.28	3701.24
			1737.03		1349.7	1349.7	1550.8	1781.87	2047.36	2352.41
			1223.42		1674.94	1674.94	1924.5	2211.24	2540.71	2919.27
			3341.69		1225.88	1225.88	1408.53	1618.39	1859.53	2136.59
			754.21		1412.3	1412.3	1622.73	1864.51	2142.31	2461.51
			2184.32		1447.4	1447.4	1663.06	1910.85	2195.56	2522.69
			1801.51		1929.36	1929.36	2216.82	2547.12	2926.64	3362.69
			884.476		2007.96	2007.96	2307.14	2650.9	3045.87	3499.7
			1586.91		1526.1	1526.1	1753.48	2014.74	2314.93	2659.85
			3893.99		2224.33	2224.33	2555.75	2936.54	3374.08	3876.81
			2211.91		1978.47	1978.47	2273.25	2611.96	3001.13	3448.29
			5339.29		1610.47	1610.47	1850.42	2126.13	2442.92	2806.9
			1538.62		1784.15	1784.15	2049.98	2355.42	2706.37	3109.61
			2070.41		2194.29	2194.29	2521.24	2896.89	3328.52	3824.45
			1304.1		1883.21	1883.21	2163.8	2486.2	2856.63	3282.26
			1263.88		3927.05	3927.05	4512.17	5184.46	5956.93	6844.49
			1895.52		5002.46	5002.46	5747.81	6604.22	7588.22	8718.84
			2112.94		3767.85	3767.85	4329.25	4974.29	5715.44	6567.02
			2037.74		4668.04	4668.04	5363.56	6162.71	7080.93	8135.97
			2016.73		3689.18	3689.18	4238.85	4870.43	5596.1	6429.9
			2265.93		3779.56	3779.56	4342.7	4989.75	5733.21	6587.43
			2192.29		3411.94	3411.94	3920.31	4504.42	5175.57	5946.71
			933.817		3130.71	3130.71	3597.17	4133.14	4748.96	5456.54
			1020		1649.63	1649.63	1895.42	2177.83	2502.32	2875.16
			1658.52		1341.51	1341.51	1541.39	1771.05	2034.93	2338.13
			1598.21		4423.94	4423.94	5083.1	5840.46	6710.67	7710.53
			1341.39		7438.79	7438.79	8547.14	9820.63	11283.9	12965.1
			1501.37		6663.47	6663.47	7656.3	8797.06	10107.8	11613.8
			2072.12		7631.02	7631.02	8768.01	10074.4	11575.5	13300.2
			891.987		4609.89	4609.89	5296.74	6085.94	6992.72	8034.61
			1043.7		6474.84	6474.84	7439.57	8548.04	9821.66	11285.1
			1629.21		7455.43	7455.43	8566.27	9842.61	11309.1	12994.1
			2470.27		7224.74	7224.74	8301.2	9538.05	10959.2	12592.1
			1830.23		8205.36	8205.36	9427.93	10832.7	12446.7	14301.2
			2963.56		5868	5868	6742.32	7746.9	8901.16	10227.4
			2593.74		2545.43	2545.43	2924.69	3360.46	3861.16	4436.45
			1269.03		2589.76	2589.76	2975.62	3418.98	3928.4	4513.71
			1828.25		3298.59	3298.59	3790.07	4354.77	5003.62	5749.14
			3026.29		2497.75	2497.75	2869.91	3297.52	3788.83	4353.36
			1453.31		2765.85	2765.85	3177.95	3651.45	4195.5	4820.62
			1070.15		3631.45	3631.45	4172.53	4794.22	5508.54	6329.29
			1649.47		3148.32	3148.32	3617.41	4156.39	4775.68	5487.24
			1993.91		2439.2	2439.2	2802.63	3220.21	3700.01	4251.3
			963.451		3861.5	3861.5	4436.85	5097.92	5857.49	6730.24
			2391.44		3164.14	3164.14	3635.58	4177.27	4799.67	5514.8
			862.141		1423.38	1423.38	1635.46	1879.13	2159.12	2480.82
			2083.94		3146.02	3146.02	3614.77	4153.36	4772.2	5483.24
			1363.42		1259.88	1259.88	1447.6	1663.29	1911.11	2195.86
			1569.35		2360.34	2360.34	2712.02	3116.1	3580.39	4113.85
			2523.31		2141.2	2141.2	2460.23	2826.8	3247.98	3731.92
			1175.86		2404.84	2404.84	2763.15	3174.85	3647.89	4191.41
			1471.46		2547.89	2547.89	2927.52	3363.71	3864.89	4440.75
			1386.92		3024.35	3024.35	3474.97	3992.73	4587.63	5271.17
			3157.24		2650.08	2650.08	3044.93	3498.61	4019.89	4618.84
			1324.58		3032.72	3032.72	3484.58	4003.77	4600.32	5285.75
			1031.96		3326.09	3326.09	3821.66	4391.08	5045.33	5797.07
			1189.67		3298.11	3298.11	3789.52	4354.14	5002.89	5748.31
			1376.74		3121.66	3121.66	3586.77	4121.19	4735.23	5440.76
			2219.04		1746.37	1746.37	2006.57	2305.54	2649.06	3043.76
			1993.39		1821.9	1821.9	2093.36	2405.26	2763.64	3175.41
			918.351		1561.18	1561.18	1793.79	2061.05	2368.14	2720.99
			1769.05		2329.75	2329.75	2676.88	3075.72	3533.99	4060.55
			1615.77		1663.93	1663.93	1911.85	2196.71	2524.01	2900.08
			2736.4		2816.68	2816.68	3236.35	3718.56	4272.61	4909.21
			1275.16		1660.48	1660.48	1907.89	2192.16	2518.78	2894.07
			860.147		1380.25	1380.25	1585.9	1822.19	2093.69	2405.65
			2164.46		1329.37	1329.37	1527.44	1755.02	2016.52	2316.97
			2699.69		1948.45	1948.45	2238.76	2572.33	2955.6	3395.97
			1767.48		2436.38	2436.38	2799.39	3216.49	3695.73	4246.38
			1913.19		1824.1	1824.1	2095.88	2408.16	2766.97	3179.24
			1166.55		1646.6	1646.6	1891.94	2173.83	2497.72	2869.88
			3252.44		1349.26	1349.26	1550.29	1781.28	2046.68	2351.63
			2319.69		2020.71	2020.71	2321.79	2667.73	3065.21	3521.92
			1686.59		2568.65	2568.65	2951.37	3391.12	3896.38	4476.93
			1836.03		2304.94	2304.94	2648.37	3042.97	3496.36	4017.3
			1597.61		2793.51	2793.51	3209.74	3687.98	4237.47	4868.84
			996.687		1904.33	1904.33	2188.07	2514.08	2888.67	3319.07
			1471.66		2446.12	2446.12	2810.58	3229.35	3710.51	4263.36
			1093.93		2467.69	2467.69	2835.37	3257.82	3743.23	4300.96
			1887.27		1772.86	1772.86	2037.01	2340.52	2689.25	3089.94
			953.917		2413.7	2413.7	2773.33	3186.54	3661.33	4206.85
			1220.98		2690.4	2690.4	3091.26	3551.85	4081.06	4689.13
			2525.81		2032.39	2032.39	2335.21	2683.15	3082.93	3542.27
			2214.95		1295.13	1295.13	1488.1	1709.82	1964.58	2257.29
			980.792		1858.03	1858.03	2134.87	2452.96	2818.44	3238.38
			1448.75		1807.81	1807.81	2077.17	2386.66	2742.26	3150.85
			1522.42		1192.3	1192.3	1369.95	1574.07	1808.6	2078.08
			1038		1553.28	1553.28	1784.72	2050.63	2356.17	2707.23
			2416.73		1638.59	1638.59	1882.73	2163.25	2485.57	2855.91
			1465.07		1244.3	1244.3	1429.7	1642.72	1887.48	2168.71
			989.636		1807.15	1807.15	2076.41	2385.79	2741.26	3149.7
			1077.71		2879.17	2879.17	3308.16	3801.06	4367.4	5018.13
			2340.37		2090.13	2090.13	2401.55	2759.37	3170.51	3642.9
			1968.77		1533.82	1533.82	1762.35	2024.93	2326.64	2673.3
			3162.07		3254.02	3254.02	3738.86	4295.94	4936.02	5671.47
			2651.63		2865.82	2865.82	3292.82	3783.43	4347.15	4994.86
			1208.21		4410.26	4410.26	5067.38	5822.4	6689.92	7686.69
			1467.33		3456.17	3456.17	3971.12	4562.81	5242.65	6023.78
			1706.99		2777.71	2777.71	3191.58	3667.12	4213.5	4841.3
			2119.46		3131.19	3131.19	3597.72	4133.77	4749.69	5457.38
			2087.62		3354.34	3354.34	3854.12	4428.37	5088.18	5846.3
			2367.2		2876	2876	3304.51	3796.87	4362.6	5012.61
			1881.35		3140.93	3140.93	3608.92	4146.64	4764.47	5474.36
			2196.66		2756.3	2756.3	3166.98	3638.85	4181.03	4803.98
			2413.94		3598.21	3598.21	4134.33	4750.33	5458.11	6271.35
			3771.71		3322.63	3322.63	3817.69	4386.51	5040.08	5791.03
			2503.35		3257.96	3257.96	3743.38	4301.13	4941.99	5678.33
			2003.07		3642.75	3642.75	4185.5	4809.13	5525.67	6348.98
			2834.24		4272	4272	4908.52	5639.87	6480.19	7445.71
			2438.97		5176.61	5176.61	5947.91	6834.13	7852.39	9022.37
			2273.14		3577.27	3577.27	4110.27	4722.69	5426.35	6234.86
			1381.41		3497.53	3497.53	4018.64	4617.41	5305.38	6095.87
			1877.85		5006.49	5006.49	5752.44	6609.53	7594.33	8725.86
			1319.79		4972.85	4972.85	5713.79	6565.12	7543.3	8667.23
			1389.91		4176.34	4176.34	4798.6	5513.58	6335.08	7278.99
			2907.47		1454.9	1454.9	1671.67	1920.74	2206.93	2535.75
			1750.98		3005.28	3005.28	3453.05	3967.54	4558.69	5237.92
			1862.55		1954.96	1954.96	2246.24	2580.92	2965.47	3407.31
			1335.71		1439.59	1439.59	1654.08	1900.53	2183.7	2509.07
			5124.22		2159.71	2159.71	2481.5	2851.23	3276.05	3764.17
			2892.44		2861.54	2861.54	3287.9	3777.78	4340.66	4987.4
			1543.55		1975.29	1975.29	2269.6	2607.76	2996.31	3442.74
			2326.26		2856.42	2856.42	3282.01	3771.02	4332.89	4978.47
			1864.95		2041.88	2041.88	2346.11	2695.68	3097.32	3558.81
			1062.32		1752.75	1752.75	2013.9	2313.96	2658.74	3054.88
			3029.05		2888.21	2888.21	3318.54	3812.99	4381.12	5033.89
			1182.88		2115.26	2115.26	2430.42	2792.55	3208.62	3686.7
			1476.83		1445.65	1445.65	1661.04	1908.53	2192.9	2519.63
			2284.43		1257.08	1257.08	1444.38	1659.59	1906.86	2190.98
			1877.05		1787.67	1787.67	2054.03	2360.07	2711.72	3115.75
			1254.66		1748.19	1748.19	2008.66	2307.95	2651.82	3046.93
			1655.07		1453.77	1453.77	1670.37	1919.25	2205.21	2533.78
			833.236		1674.17	1674.17	1923.61	2210.22	2539.54	2917.92
			3024.16		1680.26	1680.26	1930.61	2218.27	2548.78	2928.54
[truncated: 14,525 more rows]

## Sheet: S3D
Figure S3D			Growing	Static
% of events		KIF21B pausing: MT-end type (%)	67.11	32.89
(%)

## Sheet: S3F
Figure S3F			No effect	Pausing	Catastrophe
% of events		KIF21B detachment: MT-end fate (%)	70.67	10.67	18.67
(%)
