# Supplementary material for: Kinesin-4 KIF21B limits microtubule growth to allow rapid centrosome polarization in T cells
Source: eLife. 2020 Dec 21;9:e62876. doi: 10.7554/eLife.62876 (PMC7817182; doi:10.7554/eLife.62876)
Supplement: Figure 3—source data 1. [file elife-62876-fig3-data1.xlsx]

## Sheet: 3B
Figure 3B		KIF21B-GFP velocity (per event)
KIF21B-GFP Velocity		0.903
(µm/s)		1.349
		0.428
		0.802
		0.75
		0.868
		0.783
		1.014
		0.983
		1.007
		0.937
		0.924
		0.753
		0.859
		0.507
		0.763
		0.802
		0.349
		0.85
		1.648
		0.625
		0.567
		4.412
		2.171
		0.841
		0.563
		0.51
		0.733
		1.261
		0.734
		0.785
		0.714
		0.71
		0.569
		0.54
		0.752
		0.705
		0.888
		0.518
		0.757
		0.708
		0.72
		0.785
		0.697
		0.332
		0.81
		0.745
		0.634
		0.833
		0.717
		0.914
		0.727
		0.625
		0.473
		0.962
		0.542
		1.009
		0.739
		0.317
		0.682
		0.909
		0.68
		0.73
		0.807
		0.815
		0.639
		0.441
		2.059
		0.919
		0.814
		1.172
		0.855
		0.714
		0.923
		0.705
		0.724
		0.82
		0.634
		0.797
		0.77
		0.84
		0.633
		0.833
		0.583
		0.829
		0.92
		0.87
		0.873
		0.777
		0.792
		0.668
		0.949
		0.816
		0.592
		0.525
		0.487
		0.625
		0.853
		0.602
		0.685241
		0.165094
		0.871711
		0.372191
		0.505952
		0.829545
		0.959821
		0.830479
		0.820312
		1.01326
		1.04167
		0.666667
		0.8125
		0.557598
		0.573529
		0.882353
		1.35227
		0.731908
		1.36218
		0.593112
		0.723684
		0.57047
		0.669248
		0.266544
		0.412234
		0.873016
		0.797697
		0.77474
		0.945946
		1.13207
		0.959302
		0.633117
		0.842391
		0.806159
		0.471698
		0.6
		0.791016
		0.827922
		0.775862
		0.78125
		0.862772
		0.574324
		0.67637
		0.347222
		0.705357
		1.08051
		0.357824
		0.414244
		0.71558
		0.970149
		0.665584
		0.615234
		0.722403
		0.397727
		0.405844
		0.745739
		0.463129
		0.630081
		0.638686
		0.431548
		0.70122
		0.694444
		0.739796
		1.01744
		0.85041
		0.690789
		0.625
		0.625
		0.714286
		0.65051
		0.543478
		0.441176
		0.706019
		0.805921
		0.918561
		1.01064
		0.930233
		0.775
		0.564236
		0.688559
		0.837264
		0.76087
		0.706019
		0.652574
		0.785985
		0.757042
		0.625
		0.668605
		0.778689
		0.975379
		0.829327
		0.00125
		0.848214
		0.926339
		0.916667
		1.05603
		0.625
		0.719477
		0.634058
		0.736229
		0.739247
		0.601994
		0.504587
		0.404412
		0.567661
		0.778409
		0.4
		0.761218
		0.387324
		0.775
		0.833333
		0.878623
		0.720339
		0.655488
		0.675287
		0.707908
		0.721726
		0.586735
		0.757576
		0.669643
		0.588235
		0.523897
		0.669643
		1.09375
		0.9375
		0.305233
		0.4
		0.533537
		0.000875
		0.890957
		0.492958
		0.929
		0.812
		0.769
		0.639
		0.704
		0.7
		1,292
		0.941
		0.902
		1,022
		0.776
		0.364
		0.806
		0.675
		0.761
		0.718
		0.913
		0.808
		0.705
		0.797
		0.605
		0.868
		0.781
		0.84
		0.647
		0.66
		0.695
		0.779
		0.761
		0.957
		0.887
		0.64
		0.541
		0.812
		0.84
		0.845
		0.742
		0.746
		0.736
		1,033
		0.633
		0.785
		0.941
		0.822
		0.703
		0.908
		0.977
		0.58
		0.98
		0.849
		0.64
		0.766
		0.831
		0.856
		0.75
		0.65
		0.848
		0.704
		0.769
		0.856
		0.668
		0.899
		0.602
		0.382
		0.679
		0.76
		0.609
		0.625
		0.557
		0.867
		0.943
		0.609
		0.856
		0.889
		0.818
		0.778
		0.683
		1,011
		0.577
		0.686
		0.576
		0.958
		0.741
		0.81
		0.661
		0.96
		0.781
		0.752
		0.91
		1,500
		0.833
		0.884
		0.955
		1,038
		0.713
		0.916
		0.634
		0.809
		1,022
		0.943
		0.908
		1,005
		0.877
		0.817
		0.789
		0.848
		0.841
		0.744
		0.817
		0.779
		0.611
		0.806
		0.666
		0.865
		0.903
		0.604
		0.693
		0.706
		0.703
		0.653
		0.668
		0.781
		0.852
		0.745
		0.84
		0.771
		0.943
		0.744
		0.833
		0.732
		0.714
		0.634
		0.745
		0.625
		0.889
		0.743
		0.747
		0.71
		0.52
		0.833
		0.977
		0.949
		0.887
		0.841
		0.848
		0.97
		0.83
		0.916
		0.772
		0.784
		0.542
		0.79
		0.914
		0.926
		1,538
		0.762
		0.919
		0.788
		0.815
		1,007
		0.618
		0.56
		0.635
		0.101
		0.793
		0.556
		0.696
		0.972
		0.833
		0.858
		0.88
		0.917
		0.775
		0.601
		0.956
		0.887
		0.761
		0.588
		0.949
		0.328
		0.708
		0.829
		0.718
		0.74
		0.828
		0.761
		0.844
		0.694
		0.686
		0.612
		0.848
		0.788
		0.656
		0.881
		0.825
		0.788
		0.837
		0.499
		0.646
		0.781
		0.805
		0.965
		0.826
		0.905
		0.46
		0.683
		0.809
		0.764
		1,159
		0.937
		1,000
		0.774
		0.787
		0.969
		0.887
		0.868
		0.863
		0.736
		0.747
		0.653
		0.771
		0.911
		0.762
		0.573
		0.887
		0.747
		0.381
		0.792
		0.77
		1,117
		0.737
		0.893
		0.452
		0.755

## Sheet: 3C
Figure 3C		Fitted Peak intensity:			KIF21B-GFP
Fitted peak intensity (value per molecule)			monomericGFP		50 nm correction	75 nm correction
(au)			1172.92		2908.13	3341.43
			1624.16		2141.38	2460.44
			1469.82		2364.27	2716.53
			2014.63		2182.25	2507.4
			1758.02		2468.99	2836.86
			1957.11		2902.66	3335.14
			2289.24		1926.61	2213.67
			2191.09		2243.22	2577.45
			5295.33		2097.44	2409.95
			1134.15		1946.89	2236.97
			2456.23		3759.67	4319.85
			852.824		1713.58	1968.9
			2326.08		2484.48	2854.66
			911.864		2196.99	2524.33
			2770.54		2093.24	2405.13
			2842.38		2084.34	2394.9
			1287.9		2463.52	2830.58
			3255.48		2892.16	3323.09
			1047.92		2487.68	2858.34
			2730.3		2312.11	2656.61
			2700.42		2893.89	3325.07
			1552.66		2432.03	2794.4
			1481.26		2987.32	3432.42
			2798.44		1953.22	2244.24
			1102.63		2837.55	3260.33
			1555.73		4052.07	4655.81
			2915.71		2719.74	3124.98
			1874.15		2816.73	3236.41
			2479.72		4601.19	5286.75
			1409.11		2965.74	3407.62
			1863.06		3475.62	3993.48
			1766.16		4164.6	4785.11
			2354.79		3643.34	4186.19
			3120.43		2802.43	3219.98
			2972.32		2000.74	2298.85
			2403.55		2845.41	3269.37
			1956.37		3241.23	3724.16
			1973.14		2777.63	3191.49
			1822.16		4252.29	4885.87
			1754.08		3917.1	4500.73
			2225.12		3386.6	3891.19
			1816.39		4031.28	4631.93
			2557.16		1769.19	2032.79
			1238.95		1921.73	2208.06
			1524.13		4394.77	5049.58
			2651.95		3950.06	4538.6
			2240.11		3123.78	3589.21
			2192.07		2101.26	2414.34
			1698.58		1878.14	2157.97
			2316.72		2497.56	2869.68
			1404.15		2534.52	2912.15
			864.394		2377.46	2731.7
			4062.04		4347.59	4995.37
			796.177		4000.04	4596.03
			1929.61		3844.56	4417.39
			1608.18		3818.76	4387.74
			2699.33		3058.33	3514.01
			2106.16		1884.51	2165.29
			2347.55		2738.94	3147.03
			775.276		2467.12	2834.72
			1106.99		2351.7	2702.1
			1448.51		2923.99	3359.66
			1678.32		4058.92	4663.68
			1737.25		3052.74	3507.58
			1103.12		2506.31	2879.74
			2514.35		3678.8	4226.93
			1361.4		2398.06	2755.37
			2114.28		2725.16	3131.19
			2091.54		2176.7	2501.02
			899.994		2852.92	3278
			2046.05		3096.39	3557.74
			1913.09		2129.82	2447.16
			2327.32		3624.86	4164.95
			2206.1		2257.38	2593.72
			1126.04		3620.8	4160.29
			1820.72		2258.29	2594.77
			1763.06		3563.36	4094.29
			1543.11		3344.65	3842.99
			2955.03		3235.61	3717.71
			2353.6		3141.94	3610.08
			1368.43		3884.41	4463.18
			1367.32		3787.17	4351.44
			1880.56		3606.7	4144.08
			2526.51		5657.9	6500.91
			1829.04		5190.23	5963.55
			1884.74		3394	3899.69
			1203.39		4417.83	5076.08
			1412.17		4364	5014.22
			1153.01		3924.17	4508.86
			1384.83		4726.82	5431.1
			2159.14		5107.32	5868.29
			2351.42		5166.05	5935.77
			2288.77		4176.92	4799.27
			1508.67		4625.95	5315.2
			2735.59		6016.27	6912.67
			1728.59		5401.32	6206.1
			2766.37		5812.05	6678.03
			1095.47		6253.95	7185.77
			774.76		7582.05	8711.74
			1609.1		6246.46	7177.16
			2231.02		7432.71	8540.16
			1586.5		7022	8068.25
			5430.24		6591.21	7573.28
			1083.64		6235.76	7164.86
			1359		7034.76	8082.92
			1427.56		6182.72	7103.92
			3367.41		5544.51	6370.63
			1093.76		5356.28	6154.34
			2670.85		5626.11	6464.38
			1409.28		5208.35	5984.38
			1431.01		3675.93	4223.63
			1618.63		6170.58	7089.97
			4789.79		6082.7	6989
			3540.54		6103.21	7012.56
			2119.94		6162.07	7080.2
			1431.44		4186.72	4810.52
			2042.74		5120.99	5884
			1728.7		4751.96	5459.99
			2578.5		5357.62	6155.89
			1425.65		3254.74	3739.68
			2264.04		3902.33	4483.76
			2372.08		2516.02	2890.9
			653.69		4134.41	4750.42
			1791.82		2769.41	3182.04
			2592.37		3088.95	3549.19
			1554.88		2166.19	2488.94
			1948.94		2571.3	2954.42
			1210.31		4262.5	4897.59
			1026.67		2169.69	2492.96
			2291.24		3224.64	3705.1
			3496.43		2121.09	2437.13
			1517.48		2859.19	3285.2
			997.56		2305.5	2649.01
			3137.77		3160.22	3631.08
			1192.68		2129.15	2446.38
			2133.39		3118.53	3583.18
			2034.76		1925.34	2212.2
			2209.41		3129.86	3596.19
			4854.8		3610.15	4148.05
			4835.59		3426.32	3936.83
			1517.11		2637.54	3030.52
			1782.25		2697.7	3099.65
			2523.45		2687.82	3088.3
			1411.47		3473.05	3990.52
			2195.25		1807.6	2076.92
			1838.38		3744.08	4301.93
			2152.49		2487.33	2857.94
			1693.84		2010.09	2309.58
			5653.46		1953.92	2245.05
			1836.91		2343.41	2692.57
			2533.05		2953.67	3393.76
			898.865		2908.96	3342.38
			1506.43		2482.02	2851.84
			2928.76		2387.6	2743.34
			2198.53		2656.91	3052.78
			1720.57		2825.57	3246.57
			1154.56		2484.67	2854.88
			1972.24		3640.78	4183.25
			804.534		2878.84	3307.77
			1721.73		2835.01	3257.42
			1864.98		3970.95	4562.61
			1147.38		2742.92	3151.61
			1656.17		3971.33	4563.04
			2463.22		3702.97	4254.7
			949.473		2658.71	3054.85
			1645.89		4334.25	4980.03
			1493.76		3185.2	3659.79
			1018.18		2116.19	2431.5
			2190.64		2877.54	3306.28
			2265.87		2170.82	2494.27
			2137.89		2499.94	2872.42
			1222.95		2116.67	2432.05
			2235.63		2384.8	2740.13
			1383.89		3856.51	4431.12
			1774.73		2977.47	3421.11
			1681.05		2913.49	3347.59
			1784.71		4262.17	4897.22
			852.698		3161.54	3632.59
			2485.08		3440.46	3953.07
			2941.79		3098.72	3560.42
			1941.41		2406.41	2764.96
			1085.28		4958.66	5697.48
			1923.38		3648.95	4192.63
			1737.22		4672.65	5368.86
			2128.52		2691.64	3092.68
			2034.14		2099.56	2412.39
			1163.95		1868.19	2146.55
			3825.09		2599.43	2986.74
			1284.73		2555.31	2936.04
			1293.17		3269.1	3756.18
			1303.45		2849.41	3273.96
			1032.53		2094.58	2406.67
			1543.19		2546.36	2925.75
			1193.91		1790.47	2057.25
			2852.85		2823.77	3244.5
			1803.72		3976.76	4569.28
			1996.41		2862.72	3289.25
			1574.38		3630.66	4171.62
			2447.55		4843.17	5564.79
			1285.59		2227.2	2559.04
			2216.92		3473.34	3990.86
			1979.98		3726.82	4282.1
			1978.72		3198.73	3675.33
			1463.71		3086.16	3545.98
			2100.57		3231.34	3712.8
			1379.37		3846.99	4420.17
			2500.35		3175.4	3648.53
			1766.67		3735.38	4291.94
			2332.11		2579.59	2963.94
			2443.87		2994.75	3440.96
			1258.56		3729.24	4284.89
			3032.38		3317.91	3812.27
			2073.25		3105.35	3568.03
			1386.64		2462.13	2828.97
			2613.46		3779.97	4343.17
			1683.26		3906.59	4488.66
			1934.38		3528.64	4054.39
			1119.67		3718.93	4273.04
			1125.14		2798.11	3215.02
			1769.31		4485	5153.24
			1022.54		4151.66	4770.24
			2342.23		3559.21	4089.52
			1896.94		3000.85	3447.97
			1725.27		3743.83	4301.65
			1694.62		3063.56	3520.02
			1891		2092.19	2403.92
			928.946		3418.36	3927.69
			2203.27		3158.41	3629
			1155.74		5039.3	5790.14
			1657.07		4672.76	5368.98
			879.464		2573.75	2957.22
			1439.9		3274.97	3762.93
			1585.12		2463.2	2830.21
			3915		3744.09	4301.95
			2298.88		3577.85	4110.93
			1054.13		3556.93	4086.9
			1957.43		2634.34	3026.85
			3202.47		2585.48	2970.71
			3888.83		3714.49	4267.94
			1480.24		1957.91	2249.63
			2021.92		2724.85	3130.84
			2163.18		3414.78	3923.57
			2127.04		3253.5	3738.25
			1141.89		3807.56	4374.87
			2539.41		3339.04	3836.55
			1260.86		3147.38	3616.33
			4074.31		3839	4411
			1414.81		3310.62	3803.89
			1945		4614.71	5302.28
			1856.69		2319.73	2665.36
			1371.59		3123.06	3588.39
			1971.86		3577.96	4111.07
			1158.48		6101.32	7010.39
			1369		3275.63	3763.69
			1214.93		2331.08	2678.4
			1442.21		2508.64	2882.42
			1670.3		3608.45	4146.1
			1707.06		3496.67	4017.66
			2954.9		3069.98	3527.4
			1584.66		3503.16	4025.12
			3061.97		2321.83	2667.78
			1277.16		3178.31	3651.87
			1751.52		3482.04	4000.85
			1611.07		3274.63	3762.54
			2684.22		4151.14	4769.64
			2106.58		2157.89	2479.41
			1143.07		2067.02	2374.99
			1300.58		1713.41	1968.7
			2022.12		3848.96	4422.44
			2075.95		2447.49	2812.16
			1247.6		1847.12	2122.34
			1300.64		3836.06	4407.62
			1902.75		2225.08	2556.61
			1638.63		4164.85	4785.39
			1735.06		3498.32	4019.55
			1629.39		2331.51	2678.89
			1461.19		2813.46	3232.65
			2146.61		2872.66	3300.67
			2911.87		2555.21	2935.93
			1066.45		3412.53	3920.99
			1985.57		3212.27	3690.89
			1749.8		2314.71	2659.59
			2056.55		3727.85	4283.29
			1298.89		2410.07	2769.16
			1636.55		2681.88	3081.47
			1856.53		3986.37	4580.32
			1528.23		2492.73	2864.14
			910.994		3798.49	4364.45
			1428.49		3545.48	4073.74
			1414.32		2318.49	2663.93
			1682.69		2950.85	3390.52
			3077.35		3775.11	4337.59
			1510.46		3875.74	4453.21
			1836.04		3183.77	3658.14
			1544.35		4321.52	4965.41
			1499.58		2601.93	2989.61
			943.01		3518.37	4042.59
			1550.31		3584.06	4118.07
			1347.83		4105.82	4717.57
			1229.72		2916.94	3351.56
			2331.54		1950.88	2241.56
			1488.13		2509.93	2883.9
			2286.64		4226.34	4856.05
			1401.07		3954.53	4543.74
			2795.91		4663.58	5358.44
			721.772		3639.46	4181.72
			1211.91		5585.87	6418.14
			1465.58		3493.67	4014.22
			2007.33		2968.01	3410.23
			1527.77		3686.32	4235.57
			1686.87		3797.61	4363.44
			2091.55		3277.3	3765.61
			2107.63		3923.64	4508.24
			1846.41		2613.48	3002.87
			1406.83		3498.49	4019.75
			1642.7		2062.74	2370.08
			2909.73		2264.58	2602
			1441.43		3067.76	3524.85
			1606.85		2926.42	3362.44
			1784.93		2606.86	2995.27
			1828.48		3808.11	4375.5
			1898.03		4458.66	5122.98
			1674.42		5201.99	5977.07
			1085.63		4780.7	5493.01
			1400.59		4425.78	5085.21
			2764.75		4804.3	5520.13
			1520.54		3476.91	3994.96
			1166.48		5061.16	5815.25
			4001.12		4000.74	4596.84
			1174.14		4096.96	4707.39
			5380.82		5227.1	6005.92
			1650.67		5692.45	6540.6
			1184.25		4393.6	5048.23
			1759.24		1939.76	2228.77
			2257.26		3887.31	4466.51
			2752.63		4298.85	4939.37
			1945.24		4801.34	5516.73
			1067.15		4072.63	4679.44
			2061.36		4265.56	4901.12
			1544.74		2482.04	2851.85
			1338.68		2356.7	2707.85
			887.684		3722.2	4276.8
			2033.13		3804.29	4371.11
			3333.15		2264.76	2602.2
			1306.19		3008.76	3457.05
			1507.25		3367.71	3869.48
			1601.87		3125.11	3590.74
			2194.13		3810.03	4377.71
			1206.61		2940.56	3378.7
			1833.38		2821.64	3242.05
			1486.06		2741.75	3150.26
			1568.43		3381.91	3885.81
			3708.71		2384.65	2739.96
			2682.27		2998.07	3444.77
			2012.43		1800	2068.19
			2142.13		5009.92	5756.38
			3700.09		2116.14	2431.44
			1129.14		2158.46	2480.07
			2792.23		4322.74	4966.82
			2008.79		4415.56	5073.46
			2546.7		4822.99	5541.6
			2289.07		8492.67	9758.05
			2175.89		5187.36	5960.26
			1646.65		4898.8	5628.71
			1475.42		6936.7	7970.24
			2235.8		4271.87	4908.37
			1520.43		2007.51	2306.63
			2966.5		3473.49	3991.03
			1547.69		4584.81	5267.93
			1108.85		3331.34	3827.7
			2369		2932.88	3369.86
			2035.86		4628.01	5317.56
			2071.53		3064.99	3521.66
			2177.17		4928.4	5662.71
			1934.89		4581.51	5264.14
			1319.61		1939.44	2228.41
			1514.46		3956.2	4545.66
			1771.52		4069.42	4675.75
			1854.41		7301.36	8389.23
			1695.57		4164.58	4785.09
			1828.07		6487.73	7454.38
			4351.35		4238.45	4869.96
			1624.38		4971.84	5712.63
			1928.88		4186.34	4810.09
			2906.62		4247.28	4880.11
			3178.14		4130.42	4745.84
			2039.45		5906.82	6786.91
			1461.52		4976.22	5717.65
			1978.05		5180.99	5952.94
			1173.01		4272.27	4908.83
			1564.83		2372.2	2725.65
			2538.18		3792.66	4357.75
			1807.58		4720.47	5423.8
			1646.62		4493.06	5162.51
			4214.65		3453.09	3967.58
			2506.95		2492	2863.3
			1803.42		2771.27	3184.18
			1626.44		3422.23	3932.13
			1418.42		3027.48	3478.57
			1775.01		2163.89	2486.3
			2944.75		4227.01	4856.82
			973.651		2260.52	2597.33
			2280.43		4837.99	5558.83
			4193.15		7213.17	8287.91
			2371.14		6721.4	7722.87
			1389.45		4776.31	5487.96
			1989.39		3450.6	3964.72
			2017.51		4070.44	4676.92
			1223.77		4085.49	4694.22
			1395.45		2727.55	3133.94
			2143.11		6104.32	7013.84
			2647.16		2942.27	3380.65
			1101.21		5358.46	6156.85
			1669.54		3829.2	4399.73
			1587.6		2470.92	2839.07
			3137.84		2226.91	2558.71
			1120.47		1739.97	1999.21
			1552.87		1862.16	2139.61
			2661.79		3203.36	3680.65
			1415.1		4470.73	5136.85
			1998.92		3303.08	3795.23
			1502.95		3209.2	3687.36
			1933.67		3549.81	4078.72
			878.983		2577.06	2961.04
			1848.43		3879.31	4457.31
			1562.61		4127.4	4742.37
			2602.53		3288.77	3778.78
			2449.18		4744.05	5450.9
			1963.5		2840.44	3263.66
			828.193		5863.15	6736.74
			2438.7		4862.05	5586.48
			1609.58		5781.82	6643.29
			2614.99		3414.75	3923.54
			1462.02		2835.67	3258.17
			4212.12		3627.11	4167.54
			1387.93		3729.66	4285.37
			2554.02		2888.56	3318.95
			2313.52		3755.78	4315.38
			1500.34		2240.48	2574.3
			1908.35		3198.31	3674.85
			2691.51		3484.34	4003.5
			1627.21		2430.87	2793.07
			973.139		2922.08	3357.46
			1685.75		2003.79	2302.35
			1515.81		3236.52	3718.75
			1701.12		3685.69	4234.85
			1096.02		2632.81	3025.08
			1445.33		2563.04	2944.92
			2189.61		3791.72	4356.67
			2312.84		3147.82	3616.84
			3326.04		2402.39	2760.34
			1378.3		3191.52	3667.04
			1232.82		2604.89	2993.01
			1487.77		3239.5	3722.17
			1605.14		2403.93	2762.1
			3201		2039.99	2343.94
			2108.8		2393.54	2750.17
			1756.07		2471.28	2839.5
			1110.04		2434.24	2796.93
			4415.97		2404.54	2762.81
			1823.86		3860.09	4435.23
			2496.11		9675.1	11116.7
			2180.87		10658.5	12246.6
			2183.74		9629.52	11064.3
			2560.19		9190.18	10559.5
			982.302		8783.35	10092
			1602.64		10804.8	12414.6
			2398.91		9423.05	10827.1
			2649.15		9790.4	11249.1
			1272.78		5331.21	6125.54
			1468.6		5834.33	6703.62
			2221.58		6582.09	7562.8
			1487.87		9152.85	10516.6
			2377.09		7993.88	9184.94
			1191.52		7626.46	8762.77
			1834.37		6236.01	7165.15
			1492.13		6545.42	7520.67
			2532.03		5267.14	6051.93
			2120.61		3479.81	3998.29
			1670.86		2917.55	3352.26
			1022.08		2733.54	3140.83
			5079.15		2657.36	3053.3
			2271.67		3947.31	4535.45
			2048.59		3016.3	3465.72
			1791.08		3271.99	3759.51
			1241.72		3358	3858.32
			5403.24		3906.48	4488.53
			1750.91		3653.34	4197.68
			1024.94		4294.22	4934.04
			2858.86		3839.04	4411.05
			2692.33		3788.99	4353.53
			1109.58		5394.3	6198.04
			1444.44		6137.02	7051.41
			1705.01		4641.31	5332.85
			2157.87		4871.43	5597.26
			1418.93		5451.22	6263.43
			2574.41		4037.16	4638.69
			843.338		5165.3	5934.91
			1954.65		4609.91	5296.77
			1883.28		5648.04	6489.57
			1373.75		5473.18	6288.66
			3075.72		5652.04	6494.18
			1941.55		5245.48	6027.04
			1313.63		5286.58	6074.26
			2343.87		3329.58	3825.67
			1418.7		3694.67	4245.16
			1793.26		3301.84	3793.81
			1483.73		2990.7	3436.31
			1824.66		5439.48	6249.94
			1468.84		5976.14	6866.56
			1876.7		5320.61	6113.36
			2299		5872.59	6747.58
			1360.4		5615.34	6452.01
			1742.05		5810.76	6676.55
			2192.4		5573.8	6404.28
			1232.2		6125.76	7038.48
			945.486		4214.17	4842.07
			1093.3		4873.57	5599.71
			2000.88		2407.73	2766.47
			758.314		2183.4	2508.72
			2347.1		2358.11	2709.46
			1737.46		2056.35	2362.74
			1661.3		4253.06	4886.75
			2154.68		2399.4	2756.9
			2012.06		2376.54	2730.64
			1785.82		2466.08	2833.52
			894.581		2267.17	2604.97
			7524.53		2196.2	2523.43
			1424.87		3351.58	3850.96
			1539.48		2973.26	3416.27
			835.548		3273.31	3761.02
			1333.77		3789.05	4353.61
			2522.92		4514.64	5187.3
			1322.95		3432.67	3944.13
			2864.7		3583.96	4117.96
			4600.94		4804.99	5520.92
			1104.45		4751.37	5459.31
			1259.04		4360.14	5009.78
			1413.56		4206.3	4833.03
			1798.14		3160.18	3631.04
			1595.35		4744.19	5451.06
			842.286		1617.42	1858.41
			1547.37		2456.67	2822.71
			2131.95		3768.35	4329.82
			958.394		3454.43	3969.13
			1017.65		3100.79	3562.8
			992.118		3023.23	3473.68
			1567.21		3252.75	3737.4
			1401.79		2394.48	2751.24
			2638.69		3850.08	4423.73
			1876.55		4700.86	5401.27
			1803.44		3818.24	4387.15
			2102.21		4418.26	5076.57
			1909.05		4119.79	4733.62
			2518.6		3685.19	4234.27
			2017.99		3195.97	3672.15
			2548.42		4047.7	4650.79
			1571.74		3820.69	4389.96
			1695.04		3662.42	4208.11
			2939.54		2617.19	3007.14
			1136.24		2784.09	3198.91
			1290.75		2358.22	2709.59
			1475.42		1920.04	2206.12
			1102.84		1913.08	2198.12
			948.908		2473.92	2842.53
			4030.99		4474.14	5140.77
			1887.34		4442.38	5104.28
			2437.76		3707.69	4260.13
			1393.22		3780.36	4343.63
			2383.57		5193.67	5967.51
			2016.32		2181.06	2506.03
			1533.82		6370.09	7319.21
			1909.33		4093.17	4703.04
			3509.69		3369.93	3872.04
			1661.2		4707.84	5409.3
			1827.68		4261.72	4896.7
			1316.77		4177.31	4799.71
			1896.22		4885.92	5613.9
			2246.57		3841.02	4413.32
			2209.35		3591.35	4126.45
			1538.94		4241.92	4873.95
			1371.97		5032.22	5782
			1495.85		4598.25	5283.38
			2055.7		4374.69	5026.5
			2177.27		5195.67	5969.81
			3209.65		5059.74	5813.63
			3355.16		3250.94	3735.31
			2449.43		2931.42	3368.19
			3792.93		3487.63	4007.27
			1544.31		2574.79	2958.43
			1958.36		2767.62	3179.99
			1426.86		4948	5685.24
			2261.11		3718.08	4272.07
			2669.14		3980.7	4573.8
			2553.63		3499.68	4021.12
			2714.53		2740.85	3149.23
			953.065		3127.78	3593.81
			2227.78		2868.68	3296.11
			1648.32		2205.82	2534.48
			1741.98		1876.3	2155.86
			1388.39		3737.63	4294.52
			1521.61		2760.67	3171.99
			814.165		3914.51	4497.76
			1128.24		1916.08	2201.57
			1363.82		2863.77	3290.46
			2021.34		3042.18	3495.46
			1657.88		3234.75	3716.72
			2029.43		4396.78	5051.89
			1485.99		2264.62	2602.04
			1206.86		3261.3	3747.22
			1642.81		4160.44	4780.33
			1987.38		4005.96	4602.83
			1798.47		2821.04	3241.37
			1332.56		2666.96	3064.32
			5101.73		2973.87	3416.97
			3606.04		4477.63	5144.78
			1727.29		3649.73	4193.52
			2286.52		2553.26	2933.68
			2136.25		4062.33	4667.6
			2160.06		3356.62	3856.74
			1071.98		1609.82	1849.68
			1979.33		4099.2	4709.97
			1635.72		4365.63	5016.09
			1801.56		2651.49	3046.55
			2389		2838.86	3261.84
			2838.58		2329.92	2677.07
			3542.36		2942.83	3381.3
			2724.3		2981.39	3425.6
			1728.07		3428.7	3939.56
			3423.78		4691.18	5390.15
			2376.29		8886.54	10210.6
			2407.57		10276.7	11807.9
			1575.49		4507.82	5179.47
			1644.35		2906.22	3339.24
			1189.44		3619.87	4159.21
			2891.64		3775.15	4337.63
			1917.95		3059.89	3515.81
			1903.04		4527.46	5202.03
			1173.85		4412.51	5069.96
			2731.03		4688.59	5387.17
			3273.36		2795.64	3212.18
			1072.61		3329.13	3825.16
			3394.64		3227.34	3708.21
			4130.43		3383.98	3888.18
			1300.72		2241.37	2575.32
			1855.29		2819.49	3239.58
			1738.65		3594.33	4129.88
			2024.28		4020.02	4618.99
			742.521		3468.1	3984.84
			1430.71		2920.32	3355.43
			2354.21		4548.15	5225.81
			1090.82		4341.15	4987.97
			2166.01		4418.61	5076.97
			3091.1		5119.34	5882.1
			2351.3		4350.13	4998.29
			4387.88		5808.75	6674.23
			1273.22		7456.11	8567.04
			1274.16		5859.95	6733.07
			2029.31		7413.25	8517.8
			1825.42		4828.47	5547.89
			3150.56		5919.28	6801.23
			2618.11		3693.46	4243.77
			900.73		7472.17	8585.49
			2680.56		5472.39	6287.76
			1771.34		3386.28	3890.83
			1972.63		2650.43	3045.33
			1859.83		3820.51	4389.75
			2012.76		3162.66	3633.89
			1074.8		5674.92	6520.47
			2309.74		3671.3	4218.31
			1925.91		3908.03	4490.32
			1382.05		2577.23	2961.23
			1096.07		4485.79	5154.16
			2143.37		3605.51	4142.72
			2197.24		2962.04	3403.38
			1220.73		3052.84	3507.7
			1214.27		2720.52	3125.87
			1764.97		3971.33	4563.04
			2318.69		3235.35	3717.41
			1573.26		4037.99	4639.63
			1791.68		9382.35	10780.3
			1770.44		3430.79	3941.96
			3298.12		4371.6	5022.95
			2136.71		4449.95	5112.97
			2057.79		3798.7	4364.69
			2214.95		4357.48	5006.73
			2187.07		3455.34	3970.18
			1295.85		3718.69	4272.76
			3591.21		4006.15	4603.05
			2259.59		3965.83	4556.72
			2553.62		3529.14	4054.97
			1672.71		4129.01	4744.22
			1579.99		4053.2	4657.11
			1269.45		3482.05	4000.86
			1313.06		3440.03	3952.58
			1611.3		3763.45	4324.19
			1003.52		5152.99	5920.77
			2544.44		2979.34	3423.25
			1739.07		3090	3550.4
			1935.96		3174.21	3647.16
			1740.02		3212.49	3691.14
			1754.65		4518.13	5191.31
			1570.67		2510.69	2884.78
			1596.72		4428.56	5088.4
			2011.4		4238.65	4870.19
			1838.32		2972.75	3415.68
			1860.87		3538.36	4065.56
			996.837		2884.61	3314.41
			1878.09		3574.07	4106.59
			1242.26		5291.21	6079.58
			2317.53		4664.84	5359.88
			1290.04		4020.57	4619.62
			1486.05		3229.3	3710.45
			1473.92		3034.84	3487.02
			862.13		2818.39	3238.32
			1666.86		2950.3	3389.88
			968.592		2888.78	3319.2
			2254.37		3456.72	3971.76
			2013.76		3604.52	4141.58
			1661.86		2590.65	2976.64
			1178.74		4319.71	4963.33
			2377.76		4697.8	5397.76
			3465		3389.06	3894.02
			2693.73		3257.2	3742.51
			1097.78		3417.8	3927.04
			2021.84		3926.9	4511.99
			1920.26		3300.22	3791.94
			1841.13		2502.61	2875.49
			1911.99		3873.97	4451.18
			1855.55		3480.08	3998.6
			1741.04		3775.82	4338.41
			1533.73		2725.48	3131.57
			1407.87		3483.16	4002.14
			1707.6		3943.51	4531.08
			2625.49		3308.02	3800.91
			997.476		3862.59	4438.1
			1407.06		4380.33	5032.99
			2459.49		3130.39	3596.81
			2008		2177.38	2501.81
			1507.77		3060.42	3516.41
			2176.21		3911.07	4493.81
			1747.4		4184.7	4808.2
			1605.09		2929.91	3366.46
			2918.84		4388.62	5042.51
			2055.66		3545.77	4074.07
			2844.77		4093.87	4703.84
			1641.04		4114.56	4727.62
			2115.96		3859.56	4434.62
			2397.63		4314.25	4957.05
			1316.94		2687.06	3087.42
			1119.61		2752.9	3163.07
			1951.73		4489.33	5158.23
			1049.06		2302.79	2645.89
			803.142		3126.97	3592.88
			2233.51		2060.85	2367.91
			2174.84		3176.73	3650.05
			4898.22		3077.81	3536.39
			2199.06		2568.26	2950.92
			2250.83		2751.84	3161.86
			3378.52		1611.87	1852.03
			1627.83		6766.86	7775.09
			2385.64		6356.74	7303.87
			1908.04		7788.49	8948.94
			2149.38		7431.93	8539.26
			2048.91		6980.15	8020.16
			2934.79		6852.24	7873.2
			1530.35		7458.77	8570.09
			2441.83		5540.35	6365.85
			1534.97		5691	6538.93
			2465.26		6657.23	7649.14
			1465.63		6827.42	7844.68
			1066.07		6861.16	7883.45
			1340.57		6452.77	7414.21
			1766		4908.53	5639.88
			1096.22		3053.22	3508.14
			1706.49		2505.67	2879
			3539.81		3499.37	4020.77
			3913.61		3192.09	3667.7
			2070.93		2794.39	3210.74
			2526.06		3851.5	4425.36
			886.722		2970.13	3412.66
			2040.37		2364.15	2716.4
			1932.2		3798.12	4364.03
			2543.91		3263.51	3749.76
			1521.75		2600.12	2987.53
			3710.14		3430.54	3941.68
			1516.03		2104.16	2417.68
			2298.79		4015.11	4613.34
			3207.26		3895.31	4475.69
			1698.68		4348.72	4996.67
			1903.04		4451.21	5114.43
			1749.58		5191.55	5965.07
			1317.21		3923.62	4508.23
			1186.12		4785.24	5498.22
			1539.62		6585.06	7566.21
			2179.82		4763.13	5472.82
			3750.93		3933.3	4519.35
			1532.24		4552.4	5230.69
			1334.15		6060.08	6963.01
			2020.81		2050.53	2356.05
			2475.43		2521.2	2896.85
			1870.38		3174.14	3647.08
			859.143		2568.93	2951.69
			2462.28		3051.31	3505.95
			1715.36		3193.29	3669.08
			1053.58		3137.05	3604.45
			4210.51		2790.5	3206.27
			1014.18		2835.75	3258.27
			1690.55		3048.6	3502.84
			2238.9		2722.81	3128.5
			1737.04		3272.25	3759.8
			2955.76		2476.24	2845.19
			1960.9		2207.63	2536.56
			2279.05		3002.92	3450.35
			1876.67		1829.12	2101.66
			1883.89		3039.16	3491.99
			1475.45		1811.67	2081.6
			2823.97		3318.86	3813.36
			2382.92		2202.8	2531.01
			1216.72		3145.64	3614.33
			2660.67		2685.58	3085.72
			1785.7		3183.51	3657.84
			1174.14		2826.55	3247.7
			2577.41		2803.43	3221.13
			2784.39		3688.97	4238.61
			3066.99		1892.47	2174.44
			2100.47		2697.49	3099.4
			4244.98		2188.04	2514.05
			1261.26		2785.85	3200.93
			1834.36		2387.79	2743.56
			1577.84		2746.85	3156.12
			4131.46		3675.11	4222.69
			1985.37		2775.35	3188.87
			975.647		3241.34	3724.28
			785.499		3263.44	3749.68
			2067.92		2904.39	3337.13
			3628.63		2484.76	2854.98
			4276.4		2520.81	2896.4
			2000.08		2711.62	3115.65
			3664.7		2426.75	2788.32
			1813.86		1974.7	2268.92
			3005.94		1751.08	2011.99
			1208.3		2030.29	2332.8
			3227.42		3336	3833.06
			4704.11		2844.42	3268.23
			2006.08		3940.79	4527.95
			2202.25		3771.54	4333.49
			1901.01		2143.96	2463.4
			1536.11		2778.6	3192.6
			2098.07		3152.33	3622.02
			1605.74		3272.42	3760
			1903.87		3658.37	4203.46
			5033.89		3121.38	3586.45
			3242.61		2957.95	3398.67
			1343.35		3115.21	3579.37
			1883.87		4206.8	4833.59
			1620		3033.63	3485.63
			4675.69		3748.46	4306.97
			2340.88		2801.45	3218.86
			1510.44		3110.48	3573.93
			1574.2		2045.26	2349.99
			1786.38		2929.3	3365.76
			1852.53		3735.95	4292.59
			1976.92		3641.9	4184.53
			2143.89		3314.07	3807.85
			1881.01		3412.01	3920.39
			2352.47		4734.58	5440.01
			1854.01		4451.22	5114.44
			738.939		3334.37	3831.18
			3846.29		5480.82	6297.44
			1257.3		5061.41	5815.54
			1830.71		3769.56	4331.21
			1490.66		5865.86	6739.85
			1785.81		4051.77	4655.47
			1930.49		4592.97	5277.3
			2572.05		3223.97	3704.33
			1383.82		2561.91	2943.63
			1965.42		2498.92	2871.24
			1875.91		1941.92	2231.26
			3524.59		2512.55	2886.91
			1813.25		3490.59	4010.68
			2842.79		3238.13	3720.6
			1953.75		3514.53	4038.18
			3055.54		3456.9	3971.97
			1930.33		2247.43	2582.29
			2162.28		2577.98	2962.09
			950.355		4944.76	5681.51
			1691.5		3443.76	3956.86
			1761		3240.06	3722.82
			1680.83		2787.01	3202.26
			882.792		2122.57	2438.82
			1202.9		2801.79	3219.25
			1882.34		2767.82	3180.22
			1242.62		2381.74	2736.62
			1795.02		3315.4	3809.38
			1566.97		3109.63	3572.95
			1157.82		1960.33	2252.41
			1836.7		2928.49	3364.83
			2486.69		2272.21	2610.76
			2289.4		2341.44	2690.3
			2930.12		2245.7	2580.31
			3193.49		3033.05	3484.97
			1783.98		2656.22	3051.99
			1995.07		2524.39	2900.51
			2133.15		2787.11	3202.38
			1565.83		2071.59	2380.25
			1963.71		3271.41	3758.84
			1724.42		3978.87	4571.71
			4539.21		3737.61	4294.5
			2794.71		3509	4031.82
			2236.46		3229.4	3710.57
			2543.01		3936.99	4523.59
			2305.2		3889.1	4468.56
			1859.19		3127.67	3593.69
			1645.86		3885.45	4464.37
			1180.08		3572.42	4104.7
			1418.49		3551.07	4080.17
			2029.03		4165.16	4785.75
			1539.65		5400.26	6204.88
			1067.97		3939.47	4526.44
			6468.33		3300.25	3791.97
			3935.54		3136.77	3604.13
			1023.19		5036.45	5786.87
			2372.64		4251.18	4884.59
			1647.17		4322.89	4966.99
			1006.05		3659.32	4204.55
			1233.09		3788.73	4353.24
			1867.76		2835.53	3258.02
			2997.25		3264.79	3751.23
			1358.73		3200.68	3677.57
			2110.59		3442.43	3955.34
			2563.02		2654.61	3050.14
			2553.16		3350.88	3850.15
			1367.03		4137.21	4753.63
			1648.64		4324.67	4969.02
			2787.02		3217.26	3696.62
			3574.18		3505.73	4028.07
			1561.07		4238.91	4870.5
			1609.29		3742.89	4300.57
			1415.97		3099.34	3561.13
			2551.34		3244.05	3727.4
			1148.17		3816.68	4385.35
			1388.16		3112.03	3575.71
			1637.03		1958.85	2250.72
			1266.81		2558.02	2939.15
			1945.24		2767.77	3180.16
			1043.49		2591.89	2978.08
			2073.79		5757.41	6615.24
			2248.18		4378.95	5031.4
			2013.86		2513.27	2887.74
			1095.07		4740.75	5447.11
			2035.67		2946.25	3385.23
			2507.78		3947.69	4535.88
			2651.13		4461.85	5126.65
			1889.45		4128.29	4743.39
			1646.87		3890.68	4470.37
			1621.75		4235.89	4867.02
			1957.77		1821.63	2093.05
			1865.74		2050.72	2356.27
			1655.1		2891.82	3322.69
			2251.98		4046.13	4648.99
			1241.7		3154.51	3624.52
			1682.08		2088.75	2399.96
			1592.1		2868.37	3295.75
			2672.04		2383.13	2738.21
			1431.19		3346.25	3844.83
			1660.4		4331.17	4976.5
			1781.63		3443.54	3956.61
			2056.3		3495.75	4016.6
			2140.26		4424.4	5083.62
			1675.84		2699.77	3102.03
			2314		3079.96	3538.87
			2373.01		3008.78	3457.08
			2889.02		3300.36	3792.1
			2489.8		2099.62	2412.46
			1510.58		2847.82	3272.14
			1958.63		2385.94	2741.43
			2220.38		1728.1	1985.58
			1447.35		2882.33	3311.79
			2365.52		2618.32	3008.44
			3991.93		4429.5	5089.48
			1765.08		4783.46	5496.18
			1486.22		4668.7	5364.32
			2142.9		4793.65	5507.89
			2106.19		3929.33	4514.79
			2028.09		4138.95	4755.64
			2499.81		5403.01	6208.03
			1244.7		3552.46	4081.77
			1703.89		4831.68	5551.59
			2491.27		3135.4	3602.57
			1670.57		4292.29	4931.83
			3754.15		3813.47	4381.66
			898.04		3912.71	4495.69
			1561.04		3909.44	4491.94
			2309.6		4114.93	4728.04
			1449.11		2746.39	3155.59
			2713.94		3991.88	4586.66
			2297.06		3555.93	4085.76
			2188.4		3694.97	4245.51
			3495.98		2775.48	3189.02
			1109.81		4289	4928.05
			2213.09		1886.84	2167.98
			909.875		4057.77	4662.36
			1661.36		3183.21	3657.49
			1469.51		3428.75	3939.62
			1812.45		4740.58	5446.91
			1806.47		4282.89	4921.02
			2397.01		3593.87	4129.35
			1721.81		4810.37	5527.09
			2635.8		4616.38	5304.21
			2695.8		4530.39	5205.4
			2367.1		4362.06	5011.99
			1598.32		1580	1815.41
			1962.76		4006.79	4603.78
			2494.38		5414.72	6221.49
			3293.7		4286.58	4925.26
			1376.01		5206.17	5981.87
			1033.56		4933.58	5668.67
			1975.8		3746.86	4305.12
			1278.65		4249.76	4882.96
			1082.65		4786.81	5500.03
			2108.95		4738.88	5444.96
			982.701		3756.97	4316.74
			2140.84		4575.59	5257.33
			2090.95		4105.23	4716.9
			1362.21		5043.05	5794.44
			1489.92		4460.16	5124.71
			1968.14		4707.09	5408.43
			1422.81		4150.45	4768.85
			1953.55		4252.75	4886.39
			2025.21		4631.03	5321.04
			1990.99		4453.5	5117.06
			1695.19		3400.22	3906.84
			1514.86		3539.32	4066.66
			1286.33		3620.27	4159.67
			2160.5		3866.71	4442.84
			962.064		3188.84	3663.97
			2608.32		4360.49	5010.19
			2677.82		4480.7	5148.3
			1307.65		2205.83	2534.5
			1828.95		1681.5	1932.04
			2369.57		2006.29	2305.22
			1412.67		2315.06	2659.99
			2052.3		1844.68	2119.53
			2651.58		2866.97	3294.14
			2218.61		3192.8	3668.51
			1420.27		3795.29	4360.78
			2951.47		2578.53	2962.73
			1318.71		2693.06	3094.32
			1719.83		2760.16	3171.41
			1461.89		2431.04	2793.25
			2449.88		3324.8	3820.18
			1166.58		2466.2	2833.65
			1561.25		4249.37	4882.51
			967.935		4107.81	4719.86
			2458.18		4243.27	4875.5
			1929.81		1799.21	2067.29
			1452.4		7799.43	8961.52
			3077.75		6843.94	7863.67
			1068.03		8261.94	9492.94
			1168.04		2927.13	3363.26
			1210.42		5164.09	5933.52
			1231.02		6299.96	7238.63
			2746.9		5935.08	6819.39
			1754.45		5263.42	6047.65
			3405.56		5165.51	5935.16
			3182.38		4365.76	5016.25
			1562.28		6486.95	7453.48
			2150		6646.56	7636.88
			1854.28		3161.42	3632.46
			3125.31		4553.84	5232.34
			2402.99		1895.35	2177.75
			1443.9		4054.11	4658.15
			2954.46		4827.2	5546.44
			1864.55		2694.41	3095.86
			1744.01		4675.91	5372.6
			1754.74		3145.95	3614.68
			1747.06		3966.99	4558.05
			1023.94		2341.51	2690.39
			1498.52		2731.42	3138.39
			1853.46		2064.25	2371.82
			2029.61		4358.03	5007.36
			1583.11		3669.34	4216.06
			1070.3		3101.82	3563.98
			2379.79		2896.35	3327.9
			1349.43		4276.96	4914.21
			2139.5		2379.61	2734.16
			1741.07		3031.69	3483.41
			2123.69		1888.75	2170.17
			1431.39		2870.9	3298.65
			1815.39		2619.36	3009.64
			1837.6		5768.2	6627.64
			1873.06		5528.36	6352.07
			1691.73		5099.41	5859.2
			1440.95		7923.42	9103.99
			1400.66		4959.32	5698.25
			1244.81		5544.58	6370.7
			1796.21		6028.82	6927.09
			1536.55		4810.72	5527.5
			1463.94		5813.56	6679.76
			930.667		6335.12	7279.03
			1419.3		7069.2	8122.49
			1478.3		6985.36	8026.15
			1744.7		6086.28	6993.12
			1078.73		5328.32	6122.22
			3226.27		5393.94	6197.62
			2699.62		6594.05	7576.54
			2288.48		2989.37	3434.78
			3253.29		2557.95	2939.07
			2565.52		4556.09	5234.93
			1682.02		5292.78	6081.38
			1236.64		2594.65	2981.24
			1052.19		3491.73	4011.98
			1552.69		4133.18	4749
			1182.77		2784.25	3199.1
			1690.27		3301.13	3792.99
			1550.8		5140.3	5906.19
			1435.64		3875.19	4452.58
			2030		4679.86	5377.14
			1461.84		5372.03	6172.44
			2467.83		4351.49	4999.85
			1655.6		2719.35	3124.52
			2516.06		2215.89	2546.05
			1739.1		1800.2	2068.42
			2527.92		5063.97	5818.48
			1463.14		5528.41	6352.12
			961.738		5688.58	6536.16
			1570.62		5835.27	6704.7
			1385.1		4150.4	4768.79
			3423.5		5069.48	5824.82
			1184.36		6455.73	7417.61
			2351.05		5064.22	5818.77
			2541.11		6539.14	7513.45
			1611.1		6669.59	7663.34
			1386.8		4448.76	5111.61
			3514.86		5420.38	6227.99
			636.421		5692.88	6541.09
			2041.53		5462.68	6276.6
			1419.61		5502.74	6322.62
			1142.15		3543.11	4071.02
			1945.46		2500.43	2872.98
			2619.21		2995.98	3442.36
			1829.38		3523.09	4048.02
			1820.4		3964.29	4554.95
			1612.81		3070.22	3527.67
			5432.17		3180.51	3654.39
			2124.55		3266.62	3753.33
			1738.86		3444.2	3957.38
			1699.83		3543.34	4071.29
			2255.5		3074.12	3532.15
			1819.39		3371.96	3874.37
			877.367		4828.3	5547.7
			1792.32		5390.45	6193.6
			1873.64		4673.75	5370.12
			1524.42		3558.98	4089.25
			1132.07		5486.14	6303.55
			2377.9		4166.6	4787.41
			2298.56		4948.62	5685.95
			1977.99		3641.82	4184.44
			1506.35		4282.5	4920.58
			1881.07		5069	5824.26
			1768.26		3869.56	4446.11
			3273.26		5743.51	6599.28
			1498.62		5146.61	5913.44
			1457.09		4499.17	5169.53
			1553.07		4377.13	5029.31
			760.871		6024.02	6921.58
			4579.32		5110.37	5871.79
			3071.87		4685.26	5383.35
			2335.01		4721.83	5425.37
			1901.48		2553.29	2933.72
			1044.78		4646.76	5339.11
			1454.54		3977.54	4570.18
			2621.35		4885.68	5613.63
			2369.19		4665.51	5360.66
			1867.92		4264.87	4900.32
			1570.31		5446.69	6258.22
			1337.12		6786.43	7797.58
			1952.17		4645.15	5337.26
			2625.58		2021.67	2322.89
			3387.94		2264.72	2602.16
			1724.49		4248.2	4881.17
			2212.85		2134.53	2452.57
			1652.68		2859.29	3285.32
			1071.34		2667.32	3064.74
			1709.46		3398.78	3905.19
			1009.44		2946.62	3385.66
			2081.22		4775.76	5487.33
			1539.43		2697.55	3099.47
			1588.47		2644.97	3039.06
			1029.91		3711.92	4264.98
			1746.53		2742.07	3150.63
			2754.86		2016.3	2316.72
			1262.64		3432.34	3943.75
			2007.64		2109.78	2424.13
			1175.83		3369.66	3871.72
			1727.06		2455.04	2820.83
			1117.44		2028.98	2331.29
			2226.33		2561.25	2942.86
			1758.5		2017.82	2318.47
			1794.64		2493.42	2864.93
			2224.88		2812.27	3231.29
			1915.47		1676.83	1926.67
			1976.48		2926.1	3362.08
			1888.45		2777.38	3191.21
			1507.28		2360.1	2711.74
			1741.73		2072.06	2380.79
			1555.04		4555.74	5234.53
			1604.37		3012.1	3460.9
			2902.58		2399.04	2756.48
			1410.74		2140.1	2458.96
			794.206		2712.96	3117.18
			1424.25		2310.03	2654.22
			1372.04		2838.49	3261.42
			1863.17		2667.45	3064.89
			3952.64		2913.87	3348.03
			1598.87		3007.46	3455.56
			5453.05		2248.16	2583.13
			1400.51		2330.67	2677.93
			1340.06		2167.59	2490.55
			2330.92		2416.79	2776.88
			1516.41		2979.95	3423.95
			1620.61		2028.28	2330.49
			692.514		2777.98	3191.88
			2297.8		2171.15	2494.64
			1354.23		2874.65	3302.96
			2063.17		2466.41	2833.9
			2915.84		3220.62	3700.49
			951.985		2179.33	2504.04
			1142.87		1578.35	1813.52
			2176.15		2842.81	3266.38
			1674.68		1920.47	2206.61
			1794.21		2208.79	2537.89
			886.068		2282.51	2622.59
			2219.64		3666.91	4213.27
			1466.71		3232.2	3713.78
			2041.74		4739	5445.09
			1825.44		2561.37	2943.01
			2804.21		3611.66	4149.78
			1686.1		2674.92	3073.47
			1140.59		2167.7	2490.68
			2030.05		2143.65	2463.05
			1245.28		2424.23	2785.43
			1433.85		4732.9	5438.09
			3025.43		3173.68	3646.54
			2020.72		3612.11	4150.3
			2985.25		1824.29	2096.1
			1337.56		1941.81	2231.13
			2638.88		1731.3	1989.26
			1922.45		2255.94	2592.07
			5065.62		2776.35	3190.01
			2444.09		2584.19	2969.23
			1727.58		4285.46	4923.97
			2357.1		2887.96	3318.25
			1403.35		2335.41	2683.38
			2102.25		4012.24	4610.05
			4605.56		4177.8	4800.28
			2335.68		6105.66	7015.38
			1184.5		4732.78	5437.94
			2551.52		4635.23	5325.87
			2032.07		3949.14	4537.55
			1943.19		4902.8	5633.3
			1574.62		2707.93	3111.4
			2370.23		5167.84	5937.83
			3696.97		5988.91	6881.23
			1591.31		5670.83	6515.76
			4563.5		7497.01	8614.03
			1933.76		6090.6	6998.08
			1480.9		7887.78	9063.04
			1822.26		7761.25	8917.65
			2123.85		6701.7	7700.23
			1240.82		4923.57	5657.17
			1614.73		5905.99	6785.96
			1063.1		6460.47	7423.06
			1607.81		6031.64	6930.33
			1085.49		4138.23	4754.81
			740.933		5264.67	6049.08
			2314.09		5916.88	6798.47
			988.096		5813.23	6679.38
			1377.99		6541.47	7516.12
			1628.63		4834.69	5555.05
			1786.41		4704.25	5405.17
			1802.22		5632.01	6471.16
			1468.2		4729.57	5434.26
			1213.1		3890.32	4469.96
			705.712		2541.7	2920.41
			2477.43		4319.86	4963.5
			3592.62		3369.17	3871.16
			2564.8		3220.92	3700.83
			1610.67		2920.58	3355.73
			3526.6		2862.06	3288.5
			1187.75		3338.55	3835.98
			1194.49		2326.04	2672.61
			1261.39		2494.01	2865.61
			1290.26		3368.25	3870.11
			2440.76		2837.45	3260.22
			1851.3		2750.13	3159.89
			1250.67		1925.84	2212.78
			1698.01		2065.17	2372.87
			1215.52		2232.87	2565.56
			2417.15		2480.37	2849.94
			1507.23		2720.78	3126.16
			2452.32		4766.38	5476.55
			2054.03		3318.88	3813.38
			1432.2		3471.14	3988.33
			1295.48		2116.25	2431.56
			1855.65		2854.05	3279.29
			1111.35		3033.51	3485.5
			944.287		2785.46	3200.48
			2077.96		3225.22	3705.76
			2365.84		3643	4185.79
			1585.71		3149.2	3618.42
			1349.98		1988.85	2285.18
			1160.85		2921.44	3356.72
			2206.57		2728.62	3135.17
			2153.94		3276.92	3765.17
			2667.29		2244.66	2579.1
			1890.49		4034.78	4635.95
			1665.83		3171.17	3643.66
			1638		2237.12	2570.45
			1179.1		3887.37	4466.58
			3223.03		3882.14	4460.57
			2877.85		3298.56	3790.03
			2119.04		2899.46	3331.47
			2352.92		4611.09	5298.13
			2416.09		5140.56	5906.48
			3256.13		4096.73	4707.13
			1634.97		3596.83	4132.75
			2519.3		5682.26	6528.9
			941.162		3136.47	3603.79
			1634.24		1876.31	2155.87
			2426.08		3588.76	4123.47
			2013.37		2379.89	2734.48
			2417.02		2546.47	2925.89
			3989.28		3532.5	4058.83
			2355.7		3439.3	3951.74
			1799.55		3427.91	3938.66
			687.948		2381.13	2735.91
			1602.33		3560.27	4090.73
			999.685		2577.07	2961.04
			1296.83		3880.53	4458.72
			1812.47		2325.29	2671.75
			2377.11		2092.61	2404.4
			1886.8		3796.29	4361.93
			815.366		3610.05	4147.93
			1236.36		3876.91	4454.55
			1764.94		3415.77	3924.71
			2400.63		3719.21	4273.36
			2122.75		3198.57	3675.15
			1055.94		2981.73	3426
			1063.77		3145.31	3613.95
			1189.68		3859.26	4434.28
			1240.45		2626.21	3017.51
			1951.32		4445.03	5107.33
			2576.53		3530.27	4056.26
			1876.92		3243.35	3726.6
			1181.44		3928.85	4514.24
			2382.4		2338.35	2686.75
			2286.65		2416.73	2776.82
			1077.98		2424.47	2785.71
			2287.26		3324.21	3819.51
			3528.12		1914	2199.18
			1439.93		2538.69	2916.95
			1782.99		2068.77	2377.01
			1796.69		2672.17	3070.31
			2296.58		1938.17	2226.95
			1152.45		1996.9	2294.43
			1359.32		2355.46	2706.41
			2482.65		2353.29	2703.93
			1354.53		2668.37	3065.95
			1961.15		1863.08	2140.67
			1026.61		2152.14	2472.8
			1674.38		2835.78	3258.3
			2170.27		4467.01	5132.58
			1736.71		5582.31	6414.05
			2582.66		5708.56	6559.11
			1772.3		5981.5	6872.72
			1083.31		6279.41	7215.02
			3083.01		5413.67	6220.29
			1764.31		4451.09	5114.29
			3542.29		3724.78	4279.76
			1717.16		4035.61	4636.9
			1856.07		2291.96	2633.45
			1943.64		3840.45	4412.66
			3077.24		4570.24	5251.19
			2685.97		3023.44	3473.92
			2422.15		4294.71	4934.6
			1489.55		4219.71	4848.44
			1235.33		3156.75	3627.1
			1057.63		4492.81	5162.22
			2134.53		3177.05	3650.42
			1350.12		5242.95	6024.14
			1145.46		4198.32	4823.86
			1661.7		4634.57	5325.11
			3922.5		4701.5	5402.01
			2308.84		3505.74	4028.09
			2198.93		4306.01	4947.59
			3719.84		3990.73	4585.34
			2416.5		4992.45	5736.31
			2086.42		3331.84	3828.27
			2284.37		4341.21	4988.03
			1516.34		3097.82	3559.39
			2159.63		4083.8	4692.27
			1732.18		2723.65	3129.47
			3572.7		4403.42	5059.51
			1092.88		4501.52	5172.23
			2112.38		4351.3	4999.63
			2097.23		4866.2	5591.25
			1332.58		3723.34	4278.11
			2526.22		2633.94	3026.38
			2686.46		2726.57	3132.82
			1730.29		3307.8	3800.65
			1889.41		4705.52	5406.63
			1919.37		3911.47	4494.27
			2613.14		5236.71	6016.96
			2177.69		3350.48	3849.69
			1397.65		4075.05	4682.22
			1667.66		4793.3	5507.48
			2284.19		4035.44	4636.71
			3439.04		4483.33	5151.34
			1412.64		3757.12	4316.92
			1886.19		3378.89	3882.33
			1401.07		2700.71	3103.1
			1153.17		3179.64	3653.4
			1598.9		2170.49	2493.89
			2021.37		3171.28	3643.79
			2193.34		2702.83	3105.55
			1738.82		3320.24	3814.94
			1721.56		3162.14	3633.29
			1799.65		2266.68	2604.41
			2876.26		3558.71	4088.95
			2574.04		2614.94	3004.56
			1677.53		2412.44	2771.89
			1031.44		2144.33	2463.82
			3312.55		2998.46	3445.22
			2087.47		2070.15	2378.59
			1124.94		1830.24	2102.94
			1618.81		2384.18	2739.41
			943.243		3987.29	4581.38
			2047.76		5204.75	5980.23
			994.906		4841.69	5563.09
			2086.43		4869.63	5595.19
			1988.81		4455.41	5119.25
			2436.41		4419.54	5078.04
			1475.06		4340.53	4987.25
			1848.37		4528.3	5203
			2611.24		3591.14	4126.21
			1560.24		4849.32	5571.85
			1149.06		4891.56	5620.39
			2036.14		5154.39	5922.37
			2563.54		4900.29	5630.42
			2492.74		3271.04	3758.41
			1535.41		3002.19	3449.5
			970.512		1671.9	1921.01
			2350.87		2394.31	2751.06
			2101.08		2450.33	2815.42
			1230.4		3016.09	3465.47
			1917.56		3425.77	3936.2
			1655.8		2957.31	3397.94
			2523.18		3781.45	4344.87
			1996.63		2055.19	2361.41
			1871.31		2249.6	2584.78
			2587.24		2526.21	2902.61
			2336.12		2819.23	3239.28
			2701.26		2689.17	3089.85
			2925.09		2822.37	3242.9
			2459.94		2259.3	2595.93
			1904.8		2143.93	2463.37
			2951.5		2745.73	3154.83
			1345.7		2686.85	3087.18
			1056.8		4206.38	4833.12
			1782.05		2974.58	3417.78
			2712.03		2947.38	3386.53
			2189.38		2082.82	2393.16
			2684.68		2652.72	3047.97
			1956.32		2775.49	3189.03
			2011.37		2660.73	3057.17
			1396.36		2844.83	3268.7
			2548.38		2916.63	3351.2
			1009.25		3977.53	4570.17
			1295.83		4749.83	5457.53
			3139.98		4068.56	4674.76
			3027.68		5186.04	5958.74
			1732.23		6609.2	7593.94
			2754.08		3108.54	3571.7
			1166.31		2551.18	2931.29
			1518.59		2689	3089.65
			1326.74		2057.36	2363.9
			1768.79		4653.83	5347.23
			3741.91		2729.18	3135.81
			2077.26		3928	4513.26
			1430.58		5238.46	6018.97
			2011.27		5491.16	6309.33
			946.424		3639.02	4181.22
			3064.49		6458.25	7420.51
			2835.42		6671.19	7665.18
			2411.22		4766.24	5476.39
			1436.41		5621.28	6458.83
			1928.75		3914.84	4498.14
			1850.03		5308.45	6099.4
			932.022		4429.63	5089.63
			1745.63		4406.79	5063.38
			2615.46		2835.02	3257.43
			1974.86		4141.39	4758.45
			1407.54		3543.37	4071.32
			1381.3		3864.08	4439.81
			1527.52		3754.49	4313.9
			2038.77		2520.19	2895.69
			1107.28		1574.48	1809.08
			1673.35		3008.03	3456.22
			1354.53		2545.58	2924.86
			1568.66		3480.97	3999.62
			2127.85		1920.35	2206.48
			1180.88		2654.74	3050.28
			1584.63		2870.62	3298.33
			1979.96		2723.71	3129.53
			2227.71		3504.99	4027.22
			1602.86		4004.05	4600.64
			1599.35		2643.33	3037.18
			1458.11		2760.57	3171.89
			1926.36		2208.71	2537.8
			1811.67		3887.94	4467.23
			2960.43		2564.1	2946.14
			2385.17		3028.02	3479.18
			1615.72		1677.97	1927.98
			1714.66		5984.88	6876.6
			1371.98		5781.51	6642.94
			1639.62		4265.82	4901.41
			2106.18		6167.99	7087
			4940.37		5890.38	6768.02
			2391.55		4690.37	5389.22
			1490.56		4999.95	5744.92
			1183.55		4600.35	5285.79
			2697.27		6346.39	7291.98
			2664.18		4623.63	5312.53
			1656.67		3954.92	4544.19
			1643.08		3661.43	4206.97
			1717.26		4936.12	5671.59
			972.301		4908.96	5640.38
			1311.24		4114.26	4727.27
			1066.22		6257.19	7189.48
			1397.63		3437.65	3949.84
			1229.02		3704.96	4256.99
			1136.81		5593.34	6426.73
			1966.15		3797.34	4363.14
			1800.3		3027.8	3478.93
			1019.72		3801.43	4367.83
			3694.63		2513.02	2887.45
			2198.39		3950.33	4538.91
			2471.25		6645.93	7636.15
			1625.52		3677.62	4225.58
			1375.56		4798.55	5513.52
			1632.61		3290.82	3781.14
			2321.55		5220.66	5998.52
			2021.64		5177.13	5948.5
			1762.12		4335.55	4981.53
			1216.37		4488.71	5157.51
			2811.55		2932.59	3369.53
			1260.7		2460.55	2827.17
			1623.15		1827.66	2099.98
			1127.82		3231.95	3713.5
			1376.84		2528.64	2905.4
			1533.36		1985.74	2281.61
			1736.82		2609.41	2998.21
			3966.64		1903.79	2187.45
			2459.17		3296.49	3787.65
			978.159		2427.23	2788.87
			1678.93		2114.63	2429.7
			2346.66		3195.08	3671.14
			1420.89		2816.11	3235.69
			1571.74		3575.99	4108.8
			1948.89		4690.02	5388.82
			1777.56		2831.28	3253.14
			975.217		3431.45	3942.73
			934.225		4126.02	4740.78
			1547.44		3027.08	3478.11
			1335.33		4522.25	5196.05
			2517.61		5546.41	6372.81
			1461.22		2557.35	2938.39
			3106.1		2408.94	2767.86
			2499.64		3141.71	3609.82
			1836.89		3342.33	3840.33
			1537.92		2104.37	2417.91
			3674.32		3323.2	3818.35
			1695.66		3278.66	3767.17
			1306.22		3078.17	3536.81
			1731.42		3468.92	3985.78
			1815.56		6106.68	7016.56
			2120.73		7445.83	8555.23
			1015.03		6904.73	7933.51
			1296.62		5524.86	6348.05
			1858.49		5790.62	6653.41
			1414.76		6001.32	6895.5
			2228.65		2468.24	2835.99
			2185.28		3754.62	4314.05
			951.974		2885.6	3315.55
			1000.6		2450.38	2815.48
			2407.24		2888.56	3318.94
			2961.8		2789.65	3205.3
			1642.97		4689.17	5387.84
			2487.59		2915.13	3349.48
			1130.07		3066.76	3523.7
			874.779		2278.72	2618.24
			1348.8		3052.77	3507.62
			891.665		2403.91	2762.08
			2591.94		2060.18	2367.14
			1871.72		2968.06	3410.29
			2126.55		3000.82	3447.93
			1346.13		1675.43	1925.07
			1134.47		2038.06	2341.72
			1657.33		2420.05	2780.62
			3005.39		3330.27	3826.47
			1339.23		3294.8	3785.72
			1784.8		3134.38	3601.39
			2838.11		3407.63	3915.35
			1769.8		4602.08	5287.77
			2100.54		3763.34	4324.07
			1415.41		3699.27	4250.45
			1954.64		4230.35	4860.65
			1348.04		4051.71	4655.4
			1238.12		3203.86	3681.22
			998.441		3937.41	4524.08
			1677.34		1930.73	2218.41
			2124.05		2111.49	2426.09
			2251.12		3422.02	3931.89
			1838.98		2062.49	2369.79
			1421.31		1741.78	2001.3
			1128.12		2368.09	2720.93
			1874.01		2716.78	3121.57
			1365.64		1575.99	1810.81
			1138.99		2674.56	3073.06
			2430.35		3043.85	3497.38
			1243.07		3594.34	4129.88
			2414.46		2975.94	3419.35
			1860.05		4514.34	5186.97
			2178		3202.55	3679.71
			1351.22		3957.6	4547.27
			1815.73		4108.72	4720.9
			1436.51		4959.2	5698.11
			1885.21		4040.46	4642.48
			1749.18		3722.41	4277.04
			2225.68		3815.24	4383.69
			5321.71		3917.59	4501.3
			1182.88		2916.12	3350.61
			1403.56		3121.85	3587
			2959.31		1913.97	2199.15
			818.927		1723.97	1980.84
			1173.95		2498.07	2870.27
			1471.38		2128.06	2445.13
			905.19		2275.04	2614.01
			1361.19		3150.1	3619.46
			2207.45		1689.31	1941.01
			1931.43		2401.46	2759.27
			1717.54		1962.11	2254.46
			1774.29		2118.21	2433.82
			1815.96		2641.88	3035.51
			2699.33		2765.98	3178.1
			2150.79		2566.05	2948.38
			1716.1		2620.55	3011
			1305.72		2062.84	2370.19
			1246.41		2175.32	2499.44
			3114.2		2295.73	2637.79
			1687.61		2561	2942.58
			2316.71		2433.79	2796.42
			1749.27		2413.67	2773.29
			2281.62		2059.25	2366.07
			2332.04		1995.56	2292.9
			2379.91		2252.03	2587.58
			1965.52		2419.92	2780.48
			2516.81		2996.42	3442.87
			1864.34		2601.3	2988.89
			2643.8		3009.83	3458.29
			1557.72		2034.79	2337.96
			3815.51		2057.37	2363.91
			2084.01		2478.62	2847.92
			1233.68		2329.81	2676.95
			1277.85		2282.07	2622.09
			1031.52		2342.92	2692.01
			1264.87		1732.42	1990.55
			1230.66		2466.45	2833.95
			1348.32		2223.48	2554.78
			1688.53		2146.62	2466.46
			2281.54		2166.46	2489.26
			21969.2		2962.73	3404.16
			1597.53		2709.27	3112.94
			2239.31		2716.72	3121.5
			1607.79		1899.02	2181.97
			1887.51		2897.21	3328.88
			1577.03		4689.22	5387.9
			1159.86		3139.58	3607.37
			1498.37		4111.04	4723.57
			2678.82		3423.76	3933.89
			2453.51		4161.69	4781.76
			2106.08		2961.58	3402.84
			1620.3		3029.47	3480.86
			2214.37		3869.87	4446.47
			817.144		4640.44	5331.85
			2034.39		2882.62	3312.12
			2322.4		3388.3	3893.14
			1603.45		4475.62	5142.47
			1277.65		4521.84	5195.58
			1987.75		7823.82	8989.54
			2264.24		6032.56	6931.39
			1919.92		6602.11	7585.8
			1694.57		6376.99	7327.14
			1447.86		5121.8	5884.93
			1699.32		3292.35	3782.9
			2265.8		5070.11	5825.54
			1550.43		3006.92	3454.94
			2076.3		2873.26	3301.37
			1817.43		4379.49	5032.02
			2863.6		5074.78	5830.9
			2546.45		5132.37	5897.07
			1963.04		3061.12	3517.22
			2886.51		2887.52	3317.75
			2413.21		2915.47	3349.86
			1614.31		3717.63	4271.55
			1058.46		6160.78	7078.71
			1767.09		3138.1	3605.67
			1051.21		4022.76	4622.14
			1770.55		4927.55	5661.74
			1571.61		5219.48	5997.17
			4132.52		4753.28	5461.5
			1302.57		5804.09	6668.88
			1331.51		5768.6	6628.1
			1231.96		4641.97	5333.61
			1426.28		4431.91	5092.25
			1997.5		3226.4	3707.12
			5554.53		4567.11	5247.6
			1880.99		3084.8	3544.42
			1442.77		4586.8	5270.21
			1790.03		5547.57	6374.14
			1413.76		5067.51	5822.55
			1839.42		4763.96	5473.77
			668.565		4860.99	5585.26
			1750.72		3913.82	4496.97
			1683.26		2684.72	3084.73
			3403.83		3337.11	3834.33
			2164.21		3868.81	4445.25
			2134.89		2982.11	3426.44
			1390.11		2481.45	2851.17
			2267.53		4568.03	5248.65
			927.341		4351.84	5000.25
			2598.21		2637.7	3030.71
			1695.57		3172.48	3645.17
			2902.5		3051.96	3506.69
			1621.14		2871.03	3298.8
			5180.21		2073.72	2382.7
			3364.22		3983.56	4577.09
			1126.22		4789.91	5503.59
			2732.73		3428.79	3939.67
			1016.49		4808.46	5524.91
			1557.49		3062.14	3518.39
			1567.72		4131.96	4747.61
			1832.87		2993.45	3439.46
			1082.41		3780.76	4344.08
			1034.64		3095.61	3556.84
			1638.13		2904.86	3337.67
			1543.12		2536.1	2913.97
			1399.03		3280.02	3768.73
			1613.14		3390.5	3895.67
			1068.32		3499	4020.34
			2450.77		4787.82	5501.19
			2227.59		5132.23	5896.92
			2036.13		5141.4	5907.45
			2810.95		5121.11	5884.13
			1035.12		5802.71	6667.29
			975.354		2102.2	2415.43
			1553.68		3602	4138.68
			1610.66		1599.78	1838.14
			2663.67		2806.62	3224.8
			1557.06		2073.47	2382.41
			2352.91		1636.61	1880.46
			1299.24		2059.99	2366.92
			1109.33		2018.3	2319.01
			1795.93		2548.46	2928.18
			1209.1		3645.08	4188.18
			1546.69		2611.9	3001.06
			1152.1		2535.91	2913.75
			1714.98		3617.56	4156.57
			1958.97		1994.4	2291.56
			1729.27		3075.32	3533.53
			1673.87		2571.03	2954.11
			1176.48		3413.84	3922.49
			1220.33		2297.84	2640.21
			2456.87		2059.01	2365.79
			2643.27		3506.41	4028.85
			2238.31		3727.26	4282.61
			1831.05		2704.78	3107.78
			1091.4		2445.64	2810.03
			1799.75		2090.85	2402.38
			762.861		2192.16	2518.78
			1071.37		2083.07	2393.44
			1402.56		2439.35	2802.8
			1676.99		2161.92	2484.03
			1757.92		2442.01	2805.86
			1727.91		1762.74	2025.38
			2537.45		2806.99	3225.22
			1821.22		1818.53	2089.49
			2740.52		3193.46	3669.28
			1815.48		1958.63	2250.46
			2368.59		2988.46	3433.73
			1343.99		3543.83	4071.85
			6460.34		2279.36	2618.98
			2003.79		3516.1	4039.98
			2259.23		2448.65	2813.48
			1121.26		2444.11	2808.28
			1847.55		2747.5	3156.87
			1854.3		3123.59	3588.99
			1392.62		2432.35	2794.77
			1575.7		2563.3	2945.22
			1488.93		2676.78	3075.61
			1582.18		1973.6	2267.66
			2331.27		1770.89	2034.75
			1247.37		2829.39	3250.95
			1161.52		3193.63	3669.47
			2270.55		3412.19	3920.6
			5104.74		3031.13	3482.76
			1542.94		4167.78	4788.76
			1480.45		3671.9	4219
			1701.88		3010.83	3459.44
			1122.1		4484.12	5152.23
			2117.19		2252.55	2588.18
			3762.49		5498.4	6317.64
			1595.79		3643.95	4186.89
			1515.53		2390.66	2746.86
			1483.6		3510.08	4033.07
			1508.21		4301.49	4942.39
			1026.62		2849.02	3273.51
			1575		2388.14	2743.96
			1181.76		4654.66	5348.19
			1267.9		2813.85	3233.1
			2084.42		2343.1	2692.22
			2354.58		3811.79	4379.73
			2168.32		3033.29	3485.24
			2145.74		3419.36	3928.83
			1391.84		2919.08	3354.01
			1141.37		3539.8	4067.22
			3567.42		3648.26	4191.84
			3599.68		2608.36	2997
			1461.65		2109.65	2423.98
			3430.9		3565.52	4096.77
			3182.61		3822.14	4391.62
			2584.1		2515.08	2889.81
			1748.58		3669.97	4216.78
			803.037		3126.62	3592.47
			1060.97		4860.29	5584.45
			1964.29		4195.05	4820.1
			2076.27		3658.47	4203.57
			1942.77		4139.09	4755.79
			1057.18		5270.92	6056.27
			1314.63		3996.14	4591.55
			2654.59		6310.22	7250.42
			841.851		5137.4	5902.85
			2858.53		3765.67	4326.74
			1275.6		3928.92	4514.31
			1778.71		4808.95	5525.47
			2148.87		3883.19	4461.78
			1113.61		2670.16	3068
			1283.62		1748.83	2009.4
			1310.11		1970.59	2264.2
			1222.62		4308.34	4950.27
			1418.35		2226.56	2558.31
			2703.01		4774.64	5486.04
			2355.03		2803.56	3221.28
			1737.03		1781.87	2047.36
			1223.42		2211.24	2540.71
			3341.69		1618.39	1859.53
			754.21		1864.51	2142.31
			2184.32		1910.85	2195.56
			1801.51		2547.12	2926.64
			884.476		2650.9	3045.87
			1586.91		2014.74	2314.93
			3893.99		2936.54	3374.08
			2211.91		2611.96	3001.13
			5339.29		2126.13	2442.92
			1538.62		2355.42	2706.37
			2070.41		2896.89	3328.52
			1304.1		2486.2	2856.63
			1263.88		5184.46	5956.93
			1895.52		6604.22	7588.22
			2112.94		4974.29	5715.44
			2037.74		6162.71	7080.93
			2016.73		4870.43	5596.1
			2265.93		4989.75	5733.21
			2192.29		4504.42	5175.57
			933.817		4133.14	4748.96
			1020		2177.83	2502.32
			1658.52		1771.05	2034.93
			1598.21		5840.46	6710.67
			1341.39		9820.63	11283.9
			1501.37		8797.06	10107.8
			2072.12		10074.4	11575.5
			891.987		6085.94	6992.72
			1043.7		8548.04	9821.66
			1629.21		9842.61	11309.1
			2470.27		9538.05	10959.2
			1830.23		10832.7	12446.7
			2963.56		7746.9	8901.16
			2593.74		3360.46	3861.16
			1269.03		3418.98	3928.4
			1828.25		4354.77	5003.62
			3026.29		3297.52	3788.83
			1453.31		3651.45	4195.5
			1070.15		4794.22	5508.54
			1649.47		4156.39	4775.68
			1993.91		3220.21	3700.01
			963.451		5097.92	5857.49
			2391.44		4177.27	4799.67
			862.141		1879.13	2159.12
			2083.94		4153.36	4772.2
			1363.42		1663.29	1911.11
			1569.35		3116.1	3580.39
			2523.31		2826.8	3247.98
			1175.86		3174.85	3647.89
			1471.46		3363.71	3864.89
			1386.92		3992.73	4587.63
			3157.24		3498.61	4019.89
			1324.58		4003.77	4600.32
			1031.96		4391.08	5045.33
			1189.67		4354.14	5002.89
			1376.74		4121.19	4735.23
			2219.04		2305.54	2649.06
			1993.39		2405.26	2763.64
			918.351		2061.05	2368.14
			1769.05		3075.72	3533.99
			1615.77		2196.71	2524.01
			2736.4		3718.56	4272.61
			1275.16		2192.16	2518.78
			860.147		1822.19	2093.69
			2164.46		1755.02	2016.52
			2699.69		2572.33	2955.6
			1767.48		3216.49	3695.73
			1913.19		2408.16	2766.97
			1166.55		2173.83	2497.72
			3252.44		1781.28	2046.68
			2319.69		2667.73	3065.21
			1686.59		3391.12	3896.38
			1836.03		3042.97	3496.36
			1597.61		3687.98	4237.47
			996.687		2514.08	2888.67
			1471.66		3229.35	3710.51
			1093.93		3257.82	3743.23
			1887.27		2340.52	2689.25
			953.917		3186.54	3661.33
			1220.98		3551.85	4081.06
			2525.81		2683.15	3082.93
			2214.95		1709.82	1964.58
			980.792		2452.96	2818.44
			1448.75		2386.66	2742.26
			1522.42		1574.07	1808.6
			1038		2050.63	2356.17
			2416.73		2163.25	2485.57
			1465.07		1642.72	1887.48
			989.636		2385.79	2741.26
			1077.71		3801.06	4367.4
			2340.37		2759.37	3170.51
			1968.77		2024.93	2326.64
			3162.07		4295.94	4936.02
			2651.63		3783.43	4347.15
			1208.21		5822.4	6689.92
			1467.33		4562.81	5242.65
			1706.99		3667.12	4213.5
			2119.46		4133.77	4749.69
			2087.62		4428.37	5088.18
			2367.2		3796.87	4362.6
			1881.35		4146.64	4764.47
			2196.66		3638.85	4181.03
			2413.94		4750.33	5458.11
			3771.71		4386.51	5040.08
			2503.35		4301.13	4941.99
			2003.07		4809.13	5525.67
			2834.24		5639.87	6480.19
			2438.97		6834.13	7852.39
			2273.14		4722.69	5426.35
			1381.41		4617.41	5305.38
			1877.85		6609.53	7594.33
			1319.79		6565.12	7543.3
			1389.91		5513.58	6335.08
			2907.47		1920.74	2206.93
			1750.98		3967.54	4558.69
			1862.55		2580.92	2965.47
			1335.71		1900.53	2183.7
			5124.22		2851.23	3276.05
			2892.44		3777.78	4340.66
			1543.55		2607.76	2996.31
			2326.26		3771.02	4332.89
			1864.95		2695.68	3097.32
			1062.32		2313.96	2658.74
			3029.05		3812.99	4381.12
			1182.88		2792.55	3208.62
			1476.83		1908.53	2192.9
			2284.43		1659.59	1906.86
			1877.05		2360.07	2711.72
			1254.66		2307.95	2651.82
			1655.07		1919.25	2205.21
			833.236		2210.22	2539.54
			3024.16		2218.27	2548.78
[truncated: 14,525 more rows]

## Sheet: 3G
Figure 3G			Pausing	Dissociation	Tiptracking + Pause	Triptracking + detachment
% of events		KIF21B-GFP fate (%)	56.7	29.46	9.821	4.018
(%)

## Sheet: 3H
Figure 3H			Pause + Catastrophe	Pause + Growth re-initiation	No Pause - Growth continuation	Not Determined
% of events		KIF21B-GFP pausing, MT-end fate (%)	55.7	19.46	9.396	15.44
(%)

## Sheet: 3I
Figure 3I		KIF21B	EB3
Time of pausing		1.3	1.3
(s)		4.9	1.9
		1.9	1.9
		1.1	7.9
		1.4	2
		2	2.2
		3.6	3.8
		4.9	6.3
		3.1	5.1
		2.8	5.3
		7.6	8.6
		10.2	10.6
		6	1.5
		3.5	1.4
		4.4	1.8
		0.9	3.7
		0.9	4.3
		1.6	1.7
		1.2	2.8
		2.8	2.3
		1.7	3.9
		3.2	6.6
		11.4	1.5
		2.8	2.1
		2.2	3.5
		1.9	2.7
		2.5	10.3
		6.5	2
		1.5	2.4
		11.9	16.9
		1.1	1.6
		0.8	4.2
		0.6	4.9
		3.7	3.9
		0.5	2.6
		2.8	1.5
		2.4	2.9
		7.2	1.8
		2.5	2.2
		9	3.2
		1.6	5.6
		4.2	2.2
		5.5	2.7
		2.6	1.5
		3.9	2
		2.6	17.2
		1.5	2.7
		2.9	11.1
		1.1	3.5
		4.5	1.9
		3.2	1.3
		1.1	3.9
		4	28.4
		5.6	3.5
		1.1	10.1
		2.7	4.5
		1.3	3.5
		5.8	1.4
		1.5	1.6
		2	0.7
		3.4	2.4
		0.8	1.5
		5.2	1.4
		6.4	1.9
		2.6	2.6
		1.9	5.9
		1.1	0.8
		3.7	2.4
		17.8	3.3
		3.5	1.8
		10.1	2.8
		1	3.4
		3.5	1.3
		1.4	13.6
		1.6	0.7
		0.7
		2.4
		4.1
		8.3
		1.5
		1
		0.7
		2.6
		4.7
		0.5
		1
		2.7
		1.2
		1.2
		1.8
		3.2
		1.3
		1.2
		3.3
		0.6
		2.1
		7.7
		3.7
		1.8
		2.3
		1.9
		0.7
		1.7
		0.8
		2.2
		1.6
		4
		0.7
		1.8
		2.8
		0.8
		3
		1.9
		1
		2.2
		1.1
		1
		2.4
		4.1
		1.6
		3.3
		1.9
		4.3
		3.6
		2.3
		2
		1
		3
		3.3
		0.8
		3.5
		2.7
		1.7
		3.3
		3.5
		1.5
		3.7
		1.5
		1.3
		4.5
		1.9
		14.1
		2.1
		1.1
