# Supplementary material for: Kinesin-4 KIF21B limits microtubule growth to allow rapid centrosome polarization in T cells
Source: eLife. 2020 Dec 21;9:e62876. doi: 10.7554/eLife.62876 (PMC7817182; doi:10.7554/eLife.62876)
Supplement: Figure 4—figure supplement 1—source data 1. [file elife-62876-fig4-figsupp1-data1.xlsx]

## Sheet: S4A
Figure S4A		WT	KO #1	KO #2	KO #1 + 0.5 nM Vinblastine	KO #2 + 0.5 nM Vinblastine
Distance from coverslip		8.73	2.3	3.4	4.4	5.3
(µm)		7.9	2.1	10.3	3.6	4.8
		137335	10.1	3.1	3.1	3.5
		7.5	3.6	2.2	6	3.8
		10.4	3.2	4.1	4.7	2.5
		23.9	1.7	2.8	3.8	2.8
		9	3.9	3.5	1.5	3.8
		4.1	3.8	2.3	5.1	5
		3.9	2	4.2	4.4	9.2
		11	1.2	3.3	5.8	4.3
		13.5	2.3	8.1	3.5	3.2
		12.5	2.3	7.3	5.7	2.3
		5.8	6.3	2.5	2.4	7.7
		16.4	3.1	1.9	3.4	3.7
		17.7	5.3	2.6	8.7	2.7
		7.5	2.5	3.8	2.9	5.3
		2.8	2.6	2.4	7	4.2
		16	4.1	4.1	5.2	4.4
		12	1.2	3.2	7.5	1.2
		3.2	2.5	1.3	1.8	1.5
		3.9	2.8	8.2	4.8	6.7
		9.4	2.7	6.5	4.3	2.7
		4.2	2.6	3.1	0.8	2
		19.4	6.7	2	2.5	7
		12.2	4.5	1.3	7.8	3
		11.9	2.6	1.4	2.3	5.9
		11.5	2.7	7.8	2.9	6.3
		8	2.7	1.2	1.4	4.6
		12.4	1.6	4.1	1.2	5.6
		13.6	1.3	4.5	3.2	3.7
		3	3.1	1.2	1.9	3
		32.9	4.3	2.5	2.8	8
		7.4	1.5	3.5	3.5	3.5
		12	3.7	2.1	4.1	3.7
		4	2.2	4.5	3.5	4.7
		7.4	1.8	7.3	2.7	3.2
		3.4	2	2.8	3.8	1.9
		5.3	3.4	3.9	2.3	3.9
		3.3	5.6	2	1.8	2.9
		7.3	3.2	5.3	2.1	1.9
		5.2	5.8	1.6	0.8	7.5
		14.3	3.7	3.5	3.1	3.6
		5.2	6.1	3	0.8	4
		6.9	5.2	5.4	2.6	1.9
		17.8	7.5	2.3	5.8	2.7
		6.5	4.6	6.8	3.5	6.9
		11.4	5.3	4.5	2	2.2
		13.9	7.8	2	4.8	3.9
		7	4.8	1.6	2.6	2.3
		6.2	2.3	4.7	2.5	1.9
		3.9	2.3	3.8	3.6	3.1
		13.4	3.7	4.8	6.9	1.6
		3.1	4.2	2.6	2.3	3.3
		5.6	3.6	4.5	2.3	1.4
		5	6.4	2.8	2.8	2.1
		3.6	6.7	6.6	2.7	2.6
		7.7	2.1	0.8	1.6	1.6
		4.3	6.3	2.9	3.4	3.6
		9.2	4.6	6.4	2.8	4.9
		4.1	5.6	3	4.4	5.5
		2.8	3.8	6.1	2.4	8.1
		3.8	6.9	2.4	6.3	1.9
		3.2	2.3	1.2	2.5	3.5
		7.5	1.1	1.4	2.2	3.6
		3.6	6.5	4.1	3.6	2.5
		7.9	4.3	2.8	3.2	8.9
		5	6.2	7.3	3.3	4.8
		5.4	5.3	3	5.8	3.9
		3.6	1.5	3.5	6	4.2
		2.8	5.5	2.8	5.4	2
		7.3	5	3	4.2	3
		4	2.9	4.9	6	3.3
		17.3	2.7	2.7	6	3.3
		4.9	2.6	7.9	6.8	4.4
		8.1	1.5	3.5	1	5.5
		4.4	2.6	6.9	4.7	9.7
		3.1	4	4.5	9.4	6.3
		16.3	5.4	4.8	8.6	5
		17.6	2.2	3.9	2.1	3.9
		7.7	5.2	3.5	3.5	4.3
		21.9	2.4	4.3	1.9	8.8
		4.6	3.3	6.5	2.1	4.2
		8.1	3.2	2.3	5	3
		18.4	4.6	5.3	1.5	7.8
		7.5	2.2	8.9	2.4	1
		3.2	8.4	5	4.6	7.9
		3.7	2.1	3	2.6	2.6
		6	4.6	4.5	3.4	7.6
		3.8	3.4	7.9	6.4	4.7
		6	4.6	3.3	3.4	5.7
		6.7	4.3	4.3	8.5	4.8
		2.5	3.9	2.2	3.4	3.4
		6	3.3	8	8.3	3.1
		1.6	2.9	0.9	13.3	4.7
		2.5	4.3	3.6	7.4	5.3
		2.5	8.9	1.9	3.8	2.3
		6.5	7.2	12.8	8.7	3.7
		14.8	3.9	7.9	2.9	1.6
		14.7	7.8	3.9	5.2	3.3
		14.9	6	3.1	3.7	3.6
		0.5	5.5	6.9	4	5.4
		2.8	5.9	12.9	7.3
		6.6	3.5	2.8	4.6
		2.2	8.9	4.2	4.3
		3.2	7.4	2.2	4.5
		7.6	14	2.6	4.5
		3.4	4.6	3.6	3.6
		8.5	2.2	5.8	6.4
		16.2	1.6	7.6	3.1
		3.4	3.1	9.6	7
		6		5.3	2.6
		2		7.7	3.7
		3		3.8	3.5
		2.5		6.1	4.3
		2			4.5
		6.6			3.7
		4.7			2.7
		3.6
		6.9
		5.8
		3.7
		15.9
		2.9
		3.7
		5.2
		4.7
		1.5
		1.2
		2.1
		7.8
		10.3
		13.2
		2.7
		9.6
		2.5
		5
		21.6
		5.7
		7
		19
		11.1
		6.9
		18.2
		15.3
		6.1
		4.4
		3.9
		4.2
		14.8
		15.5
		11.1
		5.3
		3.2
		5.2
		9.2
		4.1
		10.4
		1.4
		4.2
		3
		8
		11
		4.7
		10.7
		8.9
		6
		7.9
		13
		11.9
		4.6
		11
		21.2
		1.8
		11.4
		5
		9.7
		7.6
		2.3
		20.7
		26.4
		16.6
		10.1
		8.6
		5.5
		4
		13.6
		14.1
		7.1
		6.5
		2.3
		9.2
		5.8
		23.7
		7.8
		5.3
		13.7
		16.6
		12.6
		21.3
		4.4
		11
		5.2
		4
		18
		11.1
		5.6
		1.9
		4.7
		3
		6.4
		8.1
		2
		12.4
		7.9
		9.2
		13.6
		4.3
		6.7
		12.7
		8.6
		4.2
		4.4
		4
		3.6
		7.3
		7.4
		25.8
		6.4
		10.7
