# Supplementary material for: Kinesin-4 KIF21B limits microtubule growth to allow rapid centrosome polarization in T cells
Source: eLife. 2020 Dec 21;9:e62876. doi: 10.7554/eLife.62876 (PMC7817182; doi:10.7554/eLife.62876)
Supplement: Figure 4—source data 1. [file elife-62876-fig4-data1.xlsx]

## Sheet: 4B
Figure 4B		WT	KO #1	KO #2	KO #1 + 0.5 nM Vinblastine	KO #2 + 0.5 nM Vinblastine
Growth rate		11.6776	21.5909	25.4464	21.7882	22.0703
(µm/min)		9.1518	26.5	42.7841	21.9069	38.074
		11.2013	25.862	21.3382	18.9012	10.0321
		10.3516	13.9741	19.6721	19.125	20.0695
		12.6838	17.7365	23.4011	12.6709	19.2888
		13.4434	26.1853	16.5039	16.4852	19.3157
		8.05458	26.0204	18.375	8.69844	12.0117
		15.625	22.9166	20.42	20.692	15.1973
		11.5013	23.5075	31.6748	15.4147	14.3858
		15.5357	19.1406	18.9004	16.369	14.4846
		13.6364	27.6182	21.2033	16.5373	14.1047
		15.4687	17.6742	19.3527	16.6858	13.6949
		17.6786	30.152	16.4825	16.9548	16.2076
		11.8903	22.8515	16.7935	17.375	22.9592
		13.6489	22.2973	25.6945	13.3078	24.734
		10.5183	22.5694	24.0954	14.7485	22.8171
		8.88156	12.6838	16.6072	17.8711	17.1007
		11.4205	16.875	25.69	20.8333	18.125
		10.9914	10.5113	30.8036	8.9193	9.95538
		11.3532	21.0459	26.3188	23.7216	23.5448
		10.5903	17.6377	21.0366	17.3142	13.1378
		14.6609	20.4167	22.7113	15.8203	10.5847
		17.4831	15.2083	23.7805	15.9375	5.99088
		14.2279	19.3015	26.6753	17.9786	7.03122
		15.767	15.3646	29.1004	15.8608	12.7985
		12.2888	21.946	10.1083	16.2371	23.6128
		15.9497	24.7768	25.7984	8.56902	16.3007
		12.5893	21.4844	16.7373	18.2927	19.2187
		14.1691	28.2812	21.9727	18.2964	13.9341
		11.0364	17.0594	20.6702	12.8788	15.3614
		10.8871	16.952	13.4641	10.0961	13.5806
		16.6777	25.1488	17.0363	23.3203	14.9265
		16.9643	22.4385	19.6181	24.4243	14.0625
		7.2	16.0022	16.0776	22.6058	12.7109
		15.2853	12.9808	14.5631	16.8888	13.8068
		12.4321	13.8845	15.1526	17.2018	22.5877
		10.7813	15.0493	13.1378	16.7763	14.4301
		5.28846	14.5834	18.5742	18.6806	13.2042
		7.03128	12.5	22.4759	27.2569	13.421
		12.2845	14.4974	21.6005	31.0787	16.9981
		10.7566	21.3542	19.2773	22.516	16.8019
		16.3043	21.4638	16.6596	31.875	19.2349
		22.0171	12.0193	19.6573	26.2207	16.999
		19.4444	15.7429	19.1272	26.9817	20.7431
		8.90154	26.4344	17.4745	17.6215	24.5089
		10.8779	19.8242	21.7634	15.4261	21.2284
		20.1109	26.3221	23.4375	14.9375	23.6049
		11.9485	14.3383	17.9717	13.9559	26.7578
		0.015	20.3804	15.4205	16.5017	14.9493
		10.4968	26.1593	19.9707	13.2965	17.1591
		13.6853	29.8469	21.0227	20.5529	16.2347
		9.50166	17.8846	20.4044	19.5101	17.3611
		10.0781	25	19.7096	19.0778	18.2143
		16.5584	29.3962	21.1935	15.7397	20.9404
		14.8186	15.9628	22.75	16.8155	8.70534
		17.6819	15.5625	17.129	16.108	7.65624
		15.3284	20.2232	23.0726	15.6888	20.2621
		17.7083	15.625	21.7361	15.9179	7.8369
		17.1635	31.9111	15.0213	12.6077	14.7152
		12.6689	21.7634	21.2612	13.2622	15.0371
		10.3831	20.9559	13.0263	13.4291	4.96326
		15.7051	29.5213	26.4154	9.97986	16.8888
		17.0759	15.296	20.6702	24.375	18.8256
		15.5931	15.6572	20.3506	22.529	17.2036
		16.265	21.375	16.472	18.3626	16.0714
		21.4286	23.7069	28.4324	20.99	21.2434
		12.9971	29.2969	19.6595	21.5107	16.2829
		13.2711	24.75	20.2303	16.9799	12.2656
		12.2351	20.7237	16.7468	29.1557	18.164
		12.8125	14.6307	23.2312	11.8849	13.2244
		26.9345	20.4942	17.6887	20.8404	8.31186
		15.9375	11.3971	17.6332	14.7059	15.8968
		15.8203	24.8641	19.1636	21.0737	17.4107
		15.1316	19.7917	20.1054	19.125	7.91664
		30.3309	16.875	23.1056	24.256	7.11936
		17.4375	22.7528	25.6975	19.8085	11.5682
		20.1671	32.3589	16.8052	21.46	19.6088
		11.1328	26.398	13.8963	14.414	31.5217
		21.6964	22.7848	14.5047	18.8717	18.6434
		11.7647	21.5014	12.1745	23.8636	18.2927
		14.1768	20.9375	19.375	14.7804	22.978
		25.6696	24.2378	10.6505	21.0439	10.4167
		23.2394	20.4545	27.4306	15.8705	17.9759
		16.723	15.9926	28.65	14.3136	16.4732
		14.6485	18.2143	14.3635	20.7974	17.2852
		14.7541	17.7705	26.986	12.5959	17.4107
		12.412	18.0469	22.7164	13.7179	17.0867
		21.1745	17.0573	21.0545	20.3664	16.7969
		15.6617	15.0528	23.2054	22.6852	11.3591
		24.487	19.7116	26.7187	19.4129	14.0625
		8.4375	25.7812	25.3811	19.3148	14.8186
		10.871	27.2461	30.7855	21.15	14.5444
		12.9117	20.788	19.357	18.4822	17.1532
		14.0625	16.487	25.0919	24.6456	13.6118
		13.6364	16.0205	25.666	22.3404	11.377
		10.4464	15.0735	23.6474	26.4423	30.6066
		12.5	13.3523	16.8298	13.0102	13.5488
		9.2742	20.1332	23.5887	12.0994	14.4335
		15.1621	20.5645	21.4358	8.60232	9.8214
		11.0294	18.8519	19.4293	12.9596	15.1654
		14.6291	16.4423	21.0197	18.4702	12.0443
		10.2163	20.8984	25.1953	16.8056	20.5024
		11.0656	15.9628	13.7127	16.8578	16.9355
		12.5	26.625	10.333	17.25	13.9009
		11.4877	42.7735	16.3422	19.5854	23.5577
		10.6887	28.5937	23.0533	13.5869	17.6705
		12.7232	20.9821	21.0227	21.5561	17.6563
		24.7306	22.5446	26.25	15.1705	12.7441
		15.8036	20.122	19.6875	15.9574	16.6529
		11.1607	30.625	21.8161	18.1985	23.125
		8.03574	24.7768	26.0918	17.0673	17.5711
		15.5242	25.5682	19.6994	19.6094	19.5184
		9.9549	17.625	22.2115	15.3533	22.8459
		11.3971	25	21.5708	17.5231	11.4527
		12.8677	23.0114	19.3015	21.9915	22.6293
		11.9612	32.3864	20.5827	30.0632	16.7348
		10.8514	18.75	22.5	24.7273	16
		22.8409	23.2863	19.0231	22.6862	12.6077
		16.9763	17.8779	21.9485	10.0211	10.1273
		33.9527	13.511	15.2282	8.68515	22.5694
		12.1976	24.0841	19.7802	24.9724	21.6488
		11.5211	25.1645	20.5408	12.88	19.8138
		21.5199	32.4777	20.8928	22.6276	16.5265
		13.613	24.1072	24.5536	15.4	14.8897
		23.9825	25.5682	32.3342	7.3549	15.2791
		19.1106	18.2194	15.3033	8.21666	13.1119
		23.9825	21.2372	15.8288	9.46525	12.4572
		23.9224	25.7813	17.6618	11.016	10.1633
		18.4211	24.8047	13.5343	18.1626	10.8872
		17.2159	20.0368	24.7159	13.7932	18.0725
		14.4791	20.4545	21.6364	14.008	16.7233
		11.3582	26.0417	24.7404	9.40247	8.7949
		18.1985	20.5452	19.8058	27.2694	8.03464
		15.8266	17.378	17.4047	23.8641	10.7231
		8.54778	21.4286	32.1396	14.875	10.6789
		13.0974	15.296	13.9091	16.2629	8.4575
		20.2806	25.7813	26.9092	78.3889	9.19063
		23.0575	25.3472	34.7893	12.9138	13.9413
		18.608	25	16.7424	14.0857	8.17925
		25.0679	21.8071	19.975	11.7612	14.8667
		15.2192	15.758	25.6645	17.0239	11.3749
		22.5302	23.1908	15.0845	12.5621	26.0328
		21.2588	24.496	16.8403	10.098	9.96094
		31.25	13.1479	26.3938	19.3636	25.7684
		27.4784	25	15.5937	10.8245	18.9429
		18.1818	22.8515	33.0811	11.3563	16.2831
		10.5263	18.4152	19.9024	39.5857	8.45455
		8.12502	15.625	20.6738	9.31654	14.7396
		10.8553	17.8571	24.072	9.46486	49.3309
		18.1547	31.25	21.5735	18.3333	18.374
		17.6953	10.3448	10.5334	27.7778	23.0013
		20.0521	8.4375	19.448	20.3906	12.4667
		21.3867	9.17118	12.0805	15.6617	13.4522
		13.3064	0.0165	12.5228	14.5408	10.3779
		15.6929	14.5047	23.5571	19.6875	18.8015
		18.8767	23.2863	20.9747	9.91584	11.307
		24.1525	26.1161	11.9268	21.5242	16.8722
		22.0204	21.3068	21.5701	27.3148	11.73
		17.5781	28.7642	9.41802	17.1336	14.8879
		14.5355	13.8889	11.3207	25.1786	12.444
		16.2313	18.75	2.40678	4.07142	37.4694
		15.3846	21.5074	15.5048	33.8315	18.1453
		21.9683	17.8427	20.4375	8.19444	12.2902
		20.7237	22.1108	17.1542	19.8933	24.0841
		21.0416	18.9904	19.5269	11.9792	15.9247
		7.06524	25.8224	23.5102	23.4375	21.2421
		15.375	25.9487	22.2252	9.97212	12.1875
		15.9926	12.9532	31.6645	22.8079	21.3796
		26.5292	18.75	19.2541	30.1758	16.3068
		21.3695	19.375	24.6094	24.8725	20.4649
		18.75	11.9088	27.3437	35.8259	24.349
		21.0937	20.1493	30.6469	27.4648	20.1627
		16.5112	22.6679	19.4989	35.1563	26.8269
		19.0848	17.7083	28.8194	23.0386	44.1964
		23.6607	14.1304	20.4044	20.374	4.84116
		13.6652	17.2637	18.8717	23.3892	6.60078
		16.5865	9.8214	17.7455	17.4479	12.4132
		15.7258	15.625	11.453	17.8571	18.1784
		24.9496	9.375	25.4297	29.6875	19.8034
		18.9413	18.164	17.4049	40.1786	19.3997
		14.1477	21.9827	21.0205	8.99232	18.1034
		18.3334	22.2656	22.0543	10.5604	10.9775
		16.3636	22.875	24.375	25.3788	10.007
		21.875	25.4464	37.7155	17.6042	19.8098
		18.75	24.0385	29.8794	10.4071	37.7344
		10.7639	17.7083	30.4687	17.0659	27.4633
		20.2303	15.0436	41.5348	23.7097	7.1289
		16.0061	16.8103	27.0833	13.1821	17.0455
		21.4286	23.1908	33.0766	33.1623	18.3119
		19.4197	16.6529	32.3102	30.9851	43.9655
		23.897	16.3306	37.5	19.9811	8.31252
		15.5048	22.141	23.5964	18.4426	11.9141
		17.4107	21.875	29.5516	26.3221	18.4659
		18.5547	21.007	16.7177	21.4562	17.4107
		15.2593	15.359	24.0317	13.4402	18.9904
		15.0066	24.2647	32.0625	21.3386	21.1719
		15.2872	10.0961	24.2958	10.8588	17.3077
		15.7633	15.7258	26.1418	12.1115	18.1891
		18.75	15.1316	26.9955	12.2378	6.9672
		11.25	12.5	17.1196	12.1008	16.0268
		22.2147	18.457	15.9628	17.5138	14.2198
		17.9167	26.1418	19.2101	15.9926	18.041
		21.3068	10.25	28.125	25.1645	15.8687
		26.9282	12.6202	40.0706	21.7408	19.5139
		17.0351	13.0435	22.7323	18.0512	17.5296
		13.9423	19.9908	17.9435	16.3408	18.935
		14.8339	18.2651	25.8578	15.1754	15.4179
		14.3092	17.4107	22.0982	21.5278	23.5417
		28.561	10.1351	30.9287	22.6357	16.5824
		20.2009	14.7775	12.4321	11.25	13.3654
		17.0192	20.6676	24.6783	30.0347	14.1518
		21.1234	14.4598	19.4926	30.7535	10.3867
		34.1114	18.289	53.7076	15.9892	13.6089
		23.9224	17.375	31.3073	10.7787	17.7632
		20.4496	12.7841	13.275	12.5055	14.2912
		23.4375	19.7917	22.6235	9.53333	17.3135
		27.8739	18.1034	25.8036	10.2398	17.0536
		26.9617	19.4711	23.3782	13.6469	17.6927
		19.987	20.3125	17.952	5.82857	21.5445
		16.4505	18.5938	16.1	9.08358	17.4197
		22.8466	14.8321	21.8734	12.4667	12.0146
		20.4044	9.60744	26.7364	16.6483	21.1908
		20.014	14.3581	12.4562	12.5134	20.625
		18.4659	17.6986	16.4536	14.04	24.5404
		17.4375	20.7983	14.6713	14.7333	19.1342
		17.7273	18.5625	22.6558	9.92308	9.5244
		19.4833	15.9926	15.19	10.2654	17.5305
		20.2953	19.5652	19.5774	10.568	6.77886
		19.6602	24.5536	17.1236	16.5593	16.6556
		17.9167	21.5941	25.0015	6.01072	13.6
		15.1966	22.8365	19.38	8.06866	9.71429
		13.9881	21.2171	13.0333	15.4224	11.1
		8.11944	18.6572	16.0093	8.14129	9.53659
		24.734	13.5937	14.403	9.47613	10.5595
		13.5059	18.3962	17.179	15.13	10.2694
		12.865	15.0632	16.7384	17.061	51.9273
		10.9223	18.276	13.94	8.93404	13.0177
		16.2736	17.5272	12.7237	17.2055	10.982
		8.9286	23.3552	19.1729	18.286	12.5652
		15.1279	24.0091	17.0919	12.8744	9.63956
		15.1889	22.8596	13.4	14.6462	9.48837
		12.8125	18.2692	15.4378	14.8205	7.37303
		16.1744	19.7443	13.7924	14.3169	11.1067
		13.0529	21.1719	39.015	36.322	11.2423
		15.6738	18.0195	17.3843	15.9705	9.0525
		18.4426	36.2618	17.2229	9.86	11.1169
		30.5233	16.0714	16.9253	14.2052	10.3133
		24.7228	19.3687	9.23772	11.1871	14.2967
		22.4265	15.5082	10.9709	12.8842	12.2902
		21.6477	20.3536	13.663	9.53957	19.1474
		20.7422	21.2402		21.8069	10.6286
		20.3125	28.9063		25.6594	14.3049
		20.4545	19.2149		20.729	5.92118
		16.61	21.9827		15.8276	9.22121
		19.9862	22.7678		13.7972	8.11837
		22.7242	36.1446			12.0635
		21.8023	23.9936			9.92245
		21.98	23.3036			21.4294
		23.4375	23.3285			9.62264
		19.6023	24.4243			23.8
		18.5795	22.3558			16.8583
		17.776	26.5214			12.1402
		18.1731	16.4304			9.5625
		18.4082	18.3894			10.9914
		19.4402	20.6614			14.5714
		16.6921	22.7539			11.7205
		15.5625	28.8542			7.82
		13.6783	30.7112
		14.8628	20.9441
		16.0714	26.7614
		17.9464	20.0431
		17.0384	31.9792
		14.875	16.9592
		9.6774	24.6791
		8.14146	24.4687
		13.4511	22.4596
		19.6023	25
		20.8008	28.6607
		22.8659	24.8684
		22.2322	27.0221
		27.0492	13.4114
		17.0833	20.6503
		16.9085	24.1072
		21.6495	17.7632
		22.2547	19.7393
		22.1739	21.985
		25.6076	20.3884
		18.4392	17.3177
		25.0178	21.7105
		29.0483	21.3479
		20.8379	24.4355
		18.8734	24.1304
		18.2379	19.7088
		11.6964	24.8283
		17.5781	28.2393
		16.088	21.4638
		11.7187	22.8727
		13.0814	27.5842
		12.8189	27.0976
		19.7917	27.5568
		14.8321	27.3148
		18.276	27.1716
		17.0009	19.5772
		34.933	21.98
		14.8495	22.204
		17.5587	26.1418
		14.0625	28.125
		17.6389	17.9687
		12.4362	19.5807
		20.3572	27.9545
		19.2434	25.708
		18.4742	25.0601
		22.3414	22.0052
		12.9596	13.5298
		25.0258	23.0515
		15.5449	25.1193
		25.5826	19.4711
		17.3349	26.8138
		23.7862	20.5163
		24.6019	17.1875
		16.1481	20.7031
		16.7521	26.7857
		22.3467	21.417
		22.112	14.0625
		22.2772	16.5243
		20.6449	20.2621
		20.1671	21.3542
		17.8856	21.5474
		16.9169	22.5465
		17.9578	16.838
		19.0034	13.8779
		17.5495	18.2982
		17.3438	26.4706
		19.336	19.2256
		22.2247	22.1082
		21.8354	21.2963
		23.267	23.1408
		14.5944	22.0109
		16.5	30.8503
		16.9369	16.3816
		10.5663	29.7443
		17.346	25.2841
		15.7819	23.5227
		16.0714	23.3902
		11.635	24.7916
		19.4293	32.3276
		14.6837	18.75
		15.9198	25.6579
		7.98612	25.2298
		25.3906	23.7981
		47.3959	23.8636
		14.2299	21.1607
		12.6838	30.8824
		19.436	33.1731
		26.0625	19.1881
		15.7408	18.532
		20.5078	22.1799
		18.2243	19.6023
		19.9219	25.7813
		16.9237	14.4578
		15.2344	16.0714
		16.712	20
		21.9827	38.6029
		20.625	26.398
		14.2279	19.1106
		26.863	19.336
		15.8385	25.1116
		13.2711	24.375
		17.5942	29.1667
		25.5682	22.5361
		21.0416	28.125
		0.0225	18.2733
		17.152	21.25
		20	13.0276
		11.7995	19.6023
		14.2912	16.9643
		12.2799	49.375
		11.0458	18.2744
		16.378	31.7935
		16.1057	23.0533
		21.1571	21.7691
		20.2303	17.6042
		21.131	17.5509
		36.8459	21.5164
		23.4375	18.5096
		25.125	24.1936
		27.7644	26.4844
		27.375	17.9847
		24.3389	20.0625
		19.9405	17.7083
		30.7617	20.3664
		28.125	18.4931
		18.75	18.75
		22.5	20.3125
		23.4375	24.4565
		23.4375	28.8325
		26.5086	21.733
		17.9228	24.375
		22.616	14.1285
		18.608	15.7609
		20.528	23.1027
		29.1667	12.5363
		26.347	31.6964
		12.3626	15.5048
		24.1477	25.3811
		26.6447	23.0114
		24.375	18.75
		18.75	20.7974
		22.3295	19.4197
		20.9441	19.3484
		23.6049	21.0937
		43.0556	18.3334
		19.2332	37.5
		19.5422	19.3453
		16.9296	22.2917
		22.526	10.6132
		27.1875	9.2076
		18.75	15.7094
		27.1552	15.3409
		25.2604	37.1394
		21.2858	26.7976
		32.6953	28.375
		28.2986	19.7311
		7.5	20.0481
		15.3935	26.3221
		29.144	24.9541
		24.4523	18.314
		26.1161	27.8963
		23.4375	20.8048
		45.1705	17.3564
		23.7608	28.125
		21.9042	34.9813
		21.5485	28.711
		30.9832	23.7269
		19.1315	27.9983
		13.6607	18.2291
		26.0417	27.0976
		25.6875	28.6459
		20.6095	20.2555
		22.2656	20.8594
		20.5301	24.6995
		20.7031	14.6033
		31.5972	21.2171
		19.9384	16.2313
		22.4227	25.3788
		18.9303	24.6292
		20.5136	27.2007
		23.1399	35.2005
		25.1953	23.3333
		22.6058	27.1875
		24.8389	30.7745
		31.6875	20.6101
		21.875	37.6537
		21.2539	21.1097
		24.7615	42.6898
		77.0833	28.7364
		17.2334	31.5733
		18.75	30
		28.6459	31.8359
		12.25	44.7115
		17.4569	36.9959
		17.5885	20.0767
		7.73664	30.6338
		23.7669	36.9067
		25.3265	21.5074
		21.7521	26.4286
		19.1078	16.1966
		17.6002	16.2181
		7.82088	28.125
		15.3478	19.4531
			25.6793
			23.792
			20.0658
			18.3787
			21.946
			20.548
			30.9593
			33.8603

## Sheet: 4C
Figure 4C		WT	KO #1	KO #2	KO #1 + 0.5 nM Vinblastine	KO #2 + 0.5 nM Vinblastine
Events per minute		9.66	5.16	8.64	8.46	28.14
(number/min)		30	27.3	8.58	6.06	8.94
		12.48	33.36	16.92	25.02	25.74
		7.14	15.78	14.64	18	29.04
		28.56	9	4.98	13.62	16.68
		7.2	7.26	3.06	46.14	30
		37.5	3.78	11.76	30	13.98
		9.78	21.42	11.1	28.56	31.56
		10.74	14.52	12.24	20.7	15.36
		8.16	22.5	10.02	12.24	9.36
		15.78	18	9.12	21.42	12.24
		4.32	6.6	11.76	21.42	12.78
		5.46	14.28	3.42	22.2	24
		5.34	19.98	26.1	23.1	8.34
		11.82	5.94	11.52	21.42	16.68
		3.06	20.7	10.02	15.78	19.98
		10.98	19.98	4.98	14.64	30
		7.92	21.42	13.02	23.1	15
		13.62	3.96	5.58	28.56	6.3
		25.02	18.78	7.08	26.1	10.74
		14.28	19.56	16.68	11.52	22.2
		9.24	26.46	7.14	31.56	16.68
		8.1	9.6	9.84	21.42	25.02
		8.64	13.62	9.12	17.28	13.02
		17.28	20.46	10.74	25.02	6.6
		5.28	5.94	8.94	14.52	14.28
		3.84	6.72	2.88	16.08	15.24
		15	11.1	5.88	22.5	26.46
		15.54	13.62	4.44	8.04	22.5
		18	13.62	4.08	16.68	10.5
		20.46	5.58	15	16.08	18.18
		22.5	14.28	6.36	17.28	33.36
		12.48	18.18	13.26	13.26	27.3
		14.52	12.48	3.54	10.98	30
		9.36	11.76	9.18	17.28	18
		3.84	16.68	12.18	13.62	49.98
		9.78	4.38	6.42	8.34	19.98
		18.78	6.96	5.28	14.04	22.2
		2.52	14.28	8.64	45	15
		8.52	28.56	3.18	30	14.28
		5.4	9.12	100.02	12.84	20.7
		10.44	16.98	8.94	25.02	18.78
		13.26	19.56	11.4	19.56	19.98
		19.56	27.3	5.52	22.5	19.38
		7.26	6.48	13.98	23.7	26.1
		26.46	17.64	18.18	28.14	18.18
		15.54	7.74	23.1	25.74	11.1
		11.52	5.1	5.58	8.82	31.56
		11.28	15	7.2	14.28	16.2
		22.5	4.08	8.34	18.18	10.92
		34.62	14.28	11.1	16.68	22.2
		8.52	3.06	5.1	12	33.36
		37.5	17.64	4.74	16.68	30
		6.6	11.28	11.28	30	15.78
		15.54	9.78	15.54	15.78	23.1
		10.2	12.18	25.02	28.14	15.78
		30	6.48	8.64	18	9.66
		13.44	8.82	8.82	14.76	19.98
		17.64	8.64	14.52	45	10.32
		24.3	9	9.84	10.74	19.38
		34.62	20.46	9.36	19.38	22.2
		21.96	21.42	27.3	23.1	10.14
		10.92	10.02	8.52	8.1	12.78
		10.14	6	9	24	23.1
		24	12.48	21.84	21.42	27.3
		5.94	21.42	4.68	6.54	22.2
		17.16	10.02	13.02	6.18	23.1
		30	13.02	4.2	16.68	7.08
		8.46	11.1	4.56	12.18	15.36
		8.22	6.36	13.02	26.46	9.66
		4.44	5.7	19.38	16.68	4.5
		16.2	10.5	16.2	13.62	14.64
		25.02	6.06	9.78	20.7	19.38
		14.64	8.34	4.5	15.78	8.46
		5.46	12.78	6.66	19.38	6.9
		35.28	19.38	20.46	10.74	18.78
		22.2	18.78	2.28	9.12	21.42
		6.6	15	18.36	19.38	13.02
		16.2	12.24	5.58	30	22.5
		4.44	16.68	8.58	17.64	15.54
		3.84	7.32	13.62	75	17.28
		20.46	7.26	9.66	18.18	30
		8.04	12.18	10.92	10.14	22.5
		17.16	4.08	1.98	18.18	15.54
		18.78	7.5	14.64	19.38	32.16
		26.1	14.28	17.16	26.1	37.5
		22.2	5.1	7.44	31.56	21.42
		12.78	5.34	56.22	13.02	6.48
		11.34	16.68	8.28	31.56	14.28
		4.8	5.94	6.18	8.1	20.7
		13.62	5.94	10.02	33.36	19.98
		17.64	4.2	5.64	26.1	17.64
		8.1	7.14	9.66	6.24	13.62
		17.64	11.52	4.2	7.62	18.78
		13.44	18.78	19.98	15.78	13.26
		7.56	8.52	10.92	28.56	15.78
		4.08	6.54	10.92	9.24	17.28
		6.54	4.68	10.14	17.16	20.94
		24	8.34	12.78	21.42	12.18
		20.46	2.7	11.22	14.64	25.02
		10.2	9.6	14.28	16.68	15.36
		12.66	5.58	14.52	14.28	9.66
		13.44	7.74	23.1	18.18	14.28
		23.1	5.94	20.46	15.36	12.84
		12.3	6.48	8.76	8.82	27.9
		13.62	14.52	12.3	13.98	37.5
		5.82	12.48	17.16	33.36	21.06
		7.92	4.74	12.78	19.98	18.48
		12.3	19.56	8.4	21.42	16.38
		11.1	12.84	7.44	25.02	9.6
		20.46	6.66	5.46	10.92	8.58
		10.74	13.62	5.04	16.2	18.78
		6.12	14.28	15.24	15.36	19.56
		8.34	5.64	7.44	17.16	20.46
		11.1	11.52	6.9	18.18	20.46
		11.52	3.72	6.9	13.62	12.3
		8.76	6.9	12.3	13.62	10.98
		10.32	9.78	10.56	16.2	14.76
		6.78	15.54	7.68	27.3	25.74
		10.74	6.6	12.3	36.36	13.02
		7.38	37.5	5.34	10.98	16.08
		22.2	17.28	8.52	12.3	14.16
		14.64	10.02	7.74	24.3	19.38
		6.24	9.12	5.94	20.46	12.9
		8.7	9.54	15.6	26.46	19.56
		24	10.02	7.8	17.28	18.78
		9	4.08	7.38	24.3	10.56
		10.2	15.36	19.14	9.36	12.36
		8.76	7.32	11.22	13.62	22.62
		29.52	5.82	4.2	18.36	16.68
		6.9	13.02	9.54	11.28	17.28
		12.48	7.02	4.86	15.54	13.44
		19.98	13.86	8.58	19.98	19.56
		18.78	6.78	18.78	18.78	12.3
		13.62	8.16	11.34	15	6.06
		20.7	7.98	16.2	17.16	6.24
		19.38	7.14	13.62	34.26	16.68
		6.24	17.16	5.22	17.16	13.86
		9.9	23.1	9.24	25.02	11.88
		8.64	13.32	3.78	36	10.56
		13.86	5.1	18.78	29.04	26.46
		15.78	14.28	7.68	19.98	8.28
		7.92	5.16	6.9	13.44	25.02
		18	25.74	9.6	10.74	10.2
		21.42	4.74	3.72	37.5	22.5
		8.16	8.28	8.64	6.48	21.42
		21.96	8.52	12.24	17.16	29.04
		29.28	21.96	9.12	15.78	16.98
		31.56	8.7	13.02	16.2	10.56
		14.52	4.56	11.28	15	13.02
		11.1	25.02	16.68	28.56	23.1
		7.44	11.76	10.14	31.56	13.62
		5.58	4.02	9.3	10.2	24.3
		25.74	39.12	31.02	16.38	6.6
		7.2	21.42	9.18	10.92	10.02
		9.36	11.76	6.18	17.64	21.42
		15	27.3	18.48	20.7	10.56
		19.14	6	7.74	32.16	17.28
		9.36	13.02	28.14	30	15.24
		11.28	18.18	5.7	18.36	16.38
		15.78	18.36	10.32	29.04	28.14
		40.92	19.56	12	32.16	21.42
		18.36	16.44	30	20.46	13.02
		9.9	32.16	10.14	18	19.38
		20.94	5.94	16.08	20.46	9.18
		14.46	10.14	17.16	20.46	19.14
		44.46	25.02	15.78	15.78	14.76
		27.9	9.18	12.24	8.46	23.1
		28.56	8.04	14.64	13.02	9.36
		19.98	14.28	9.12	16.98	19.14
		42.84	12.66		10.56	8.76
		20.46	8.76		29.04	7.74
		32.16	18.78		26.1	17.16
		12	13.26		13.32
		17.16	7.02		9.36
		8.94	6.84		17.16
		24	6.96		20.7
		15.54	10.74		12.24
					9.84
					15.78
					12.78
					21.42
					18.18
					10.44
					20.46
					25.02
					34.62
					19.98
					14.04
					8.94
					18.18
					19.38
					10.74
					16.2
					27.3
					25.02
					37.5
					19.98
					5.82
					24.3
					34.62
					8.28
					14.04
					7.62
					18

## Sheet: 4E
Figure 4E			MT plus-end fate, in %
% of events			Catastrophe	Buckling	Pausing	Sliding
(%)		WT	9.85	40.93	44.21	5.02
		KO#1	6.5	64.76	21.65	7.09
		KO#2	7.55	61.01	23.9	7.55
		KO #1 + 0.5 nM Vinblastine	32.72	37.13	21.51	8.64
		KO #2 + 0.5 nM Vinblastine	31.3	36.43	24.69	7.58

## Sheet: 4F
Figure 4F		WT	KO #1	KO #2	KO #1 + 0.5 nM Vinblastine	KO #2 + 0.5 nM Vinblastine
MT pause duration		8.73	2.3	3.4	4.4	5.3
(s)		7.9	2.1	10.3	3.6	4.8
		137335	10.1	3.1	3.1	3.5
		7.5	3.6	2.2	6	3.8
		10.4	3.2	4.1	4.7	2.5
		23.9	1.7	2.8	3.8	2.8
		9	3.9	3.5	1.5	3.8
		4.1	3.8	2.3	5.1	5
		3.9	2	4.2	4.4	9.2
		11	1.2	3.3	5.8	4.3
		13.5	2.3	8.1	3.5	3.2
		12.5	2.3	7.3	5.7	2.3
		5.8	6.3	2.5	2.4	7.7
		16.4	3.1	1.9	3.4	3.7
		17.7	5.3	2.6	8.7	2.7
		7.5	2.5	3.8	2.9	5.3
		2.8	2.6	2.4	7	4.2
		16	4.1	4.1	5.2	4.4
		12	1.2	3.2	7.5	1.2
		3.2	2.5	1.3	1.8	1.5
		3.9	2.8	8.2	4.8	6.7
		9.4	2.7	6.5	4.3	2.7
		4.2	2.6	3.1	0.8	2
		19.4	6.7	2	2.5	7
		12.2	4.5	1.3	7.8	3
		11.9	2.6	1.4	2.3	5.9
		11.5	2.7	7.8	2.9	6.3
		8	2.7	1.2	1.4	4.6
		12.4	1.6	4.1	1.2	5.6
		13.6	1.3	4.5	3.2	3.7
		3	3.1	1.2	1.9	3
		32.9	4.3	2.5	2.8	8
		7.4	1.5	3.5	3.5	3.5
		12	3.7	2.1	4.1	3.7
		4	2.2	4.5	3.5	4.7
		7.4	1.8	7.3	2.7	3.2
		3.4	2	2.8	3.8	1.9
		5.3	3.4	3.9	2.3	3.9
		3.3	5.6	2	1.8	2.9
		7.3	3.2	5.3	2.1	1.9
		5.2	5.8	1.6	0.8	7.5
		14.3	3.7	3.5	3.1	3.6
		5.2	6.1	3	0.8	4
		6.9	5.2	5.4	2.6	1.9
		17.8	7.5	2.3	5.8	2.7
		6.5	4.6	6.8	3.5	6.9
		11.4	5.3	4.5	2	2.2
		13.9	7.8	2	4.8	3.9
		7	4.8	1.6	2.6	2.3
		6.2	2.3	4.7	2.5	1.9
		3.9	2.3	3.8	3.6	3.1
		13.4	3.7	4.8	6.9	1.6
		3.1	4.2	2.6	2.3	3.3
		5.6	3.6	4.5	2.3	1.4
		5	6.4	2.8	2.8	2.1
		3.6	6.7	6.6	2.7	2.6
		7.7	2.1	0.8	1.6	1.6
		4.3	6.3	2.9	3.4	3.6
		9.2	4.6	6.4	2.8	4.9
		4.1	5.6	3	4.4	5.5
		2.8	3.8	6.1	2.4	8.1
		3.8	6.9	2.4	6.3	1.9
		3.2	2.3	1.2	2.5	3.5
		7.5	1.1	1.4	2.2	3.6
		3.6	6.5	4.1	3.6	2.5
		7.9	4.3	2.8	3.2	8.9
		5	6.2	7.3	3.3	4.8
		5.4	5.3	3	5.8	3.9
		3.6	1.5	3.5	6	4.2
		2.8	5.5	2.8	5.4	2
		7.3	5	3	4.2	3
		4	2.9	4.9	6	3.3
		17.3	2.7	2.7	6	3.3
		4.9	2.6	7.9	6.8	4.4
		8.1	1.5	3.5	1	5.5
		4.4	2.6	6.9	4.7	9.7
		3.1	4	4.5	9.4	6.3
		16.3	5.4	4.8	8.6	5
		17.6	2.2	3.9	2.1	3.9
		7.7	5.2	3.5	3.5	4.3
		21.9	2.4	4.3	1.9	8.8
		4.6	3.3	6.5	2.1	4.2
		8.1	3.2	2.3	5	3
		18.4	4.6	5.3	1.5	7.8
		7.5	2.2	8.9	2.4	1
		3.2	8.4	5	4.6	7.9
		3.7	2.1	3	2.6	2.6
		6	4.6	4.5	3.4	7.6
		3.8	3.4	7.9	6.4	4.7
		6	4.6	3.3	3.4	5.7
		6.7	4.3	4.3	8.5	4.8
		2.5	3.9	2.2	3.4	3.4
		6	3.3	8	8.3	3.1
		1.6	2.9	0.9	13.3	4.7
		2.5	4.3	3.6	7.4	5.3
		2.5	8.9	1.9	3.8	2.3
		6.5	7.2	12.8	8.7	3.7
		14.8	3.9	7.9	2.9	1.6
		14.7	7.8	3.9	5.2	3.3
		14.9	6	3.1	3.7	3.6
		0.5	5.5	6.9	4	5.4
		2.8	5.9	12.9	7.3
		6.6	3.5	2.8	4.6
		2.2	8.9	4.2	4.3
		3.2	7.4	2.2	4.5
		7.6	14	2.6	4.5
		3.4	4.6	3.6	3.6
		8.5	2.2	5.8	6.4
		16.2	1.6	7.6	3.1
		3.4	3.1	9.6	7
		6		5.3	2.6
		2		7.7	3.7
		3		3.8	3.5
		2.5		6.1	4.3
		2			4.5
		6.6			3.7
		4.7			2.7
		3.6
		6.9
		5.8
		3.7
		15.9
		2.9
		3.7
		5.2
		4.7
		1.5
		1.2
		2.1
		7.8
		10.3
		13.2
		2.7
		9.6
		2.5
		5
		21.6
		5.7
		7
		19
		11.1
		6.9
		18.2
		15.3
		6.1
		4.4
		3.9
		4.2
		14.8
		15.5
		11.1
		5.3
		3.2
		5.2
		9.2
		4.1
		10.4
		1.4
		4.2
		3
		8
		11
		4.7
		10.7
		8.9
		6
		7.9
		13
		11.9
		4.6
		11
		21.2
		1.8
		11.4
		5
		9.7
		7.6
		2.3
		20.7
		26.4
		16.6
		10.1
		8.6
		5.5
		4
		13.6
		14.1
		7.1
		6.5
		2.3
		9.2
		5.8
		23.7
		7.8
		5.3
		13.7
		16.6
		12.6
		21.3
		4.4
		11
		5.2
		4
		18
		11.1
		5.6
		1.9
		4.7
		3
		6.4
		8.1
		2
		12.4
		7.9
		9.2
		13.6
		4.3
		6.7
		12.7
		8.6
		4.2
		4.4
		4
		3.6
		7.3
		7.4
		25.8
		6.4
		10.7

## Sheet: 4H-I
Figure 4H and I		WT	KO #1	KO #2	KO #1 + KIF21B-GFP	KO #2 + KIF21B-GFP	KO #1 + 0.5 nM Vinblastine	KO #2 + 0.5 nM Vinblastine
Distance from coverslip		0.9375	1.817	1.783	0.938	0.976	2.861	1.35
(µm)		0.9625	2.4	1.1251	5.65	2.175	0.854	1.694
		0.9251	1.225	2.516	2.175	2.55	1.003	5.705
		1.975	3.333	6.425	5.1	1.0667	1.35	1.595
		1.875	1.517	7.7	3.283	6.36	1.373	0.866
		1.225	1.3627	4.8	1.1	1.283	2.341	1.317
		1.125	1.168	5.275	1.441	0.9513	0.912	1.569
		1.208	7.325	1.0313	8.7	4.975	3.882	2.264
		2.8667	7.772	5.416	1.35	1.25	1.226	0.75
		0.9375	5.533	0.9418	2.363	4.075	2.767	4.657
		2.083	5.4	1.662	3.0835	2.825	2.687	2.025
		1.325	1.775	5.055	1.325	0.983	0.767	2.8
		1.067	3.975	1.4875	1.5667	1.3002	1.941	1.08
		0.9	2.45	4.725	3.883	6.275	1.575	3.175
		0.984	5.466	2.467	5.5	2.85	0.982	2.378
		1.65	4.8	1.212	7.267	4.75	1.129	1.063
		1.15	6.45	2.5167	1	1.301	1.025	1.424
		1.308	1.9	2.25	5.6	2.32	4.478	0.934
		1.225	5.083	5.975	5.1667	2.45	1.269	0.881
		0.9375	6.616	1.25	1.183	3.15	3.932	6.375
		1.042	3.175	0.9625	1.625	1.451	2.456	3.21
		1.037	2.587	2.2834	2.125	4.1	4.682	2.125
		1.6084	6.15	1.0382	3.0841	5.175	1.82	1.041
		1.4	1.537	6.025	2.15	5.45	2.475	0.875
		1.175	1.6375	7.3	1.15	3.75	1.05	1.017
		1.763	5.225	3.766	1.467	4.75	3.275	1.031
		2.683	1.237	1.925	3.45	1.486	1.45	1.104
		0.908	2.0375	5.6	1.737	7.7	1.534	6.075
		1.265	3.8167	2.533	2.433	2.084	3.2	5.267
		1.16	3.6125	1.0625	5.075	1.4	4.379	2.363
		1.6	3.037	1.766	1.5834	2.067	1.128	3.9
		1.258	2.5167	2.675	2.7	1.683	1.796	1.031
		3.95	5.555	3.7	0.95	3.15	1.509	0.925
		1.575	1.375	6.075	1.162	0.9	6.469	2.067
		1.2	5.95	1.075	1.9002	6.75	1.433	1.562
		0.9	1.233	0.95	4.6001	2.883	1.669	1.261
		1.9625	4.425	6.117	4.2751	4.2667	0.932	4.95
		0.9339	3.483	8.875	0.8875	2.625	0.997	2.811
		1.1335	1.0628	4.175	1.2168	2.9	1.685	1.625
		1.2501	5.95	1.277	1.675	4.15	2.079	0.767
		1.2501	1.516	6.225	2.3667	1.1	1.867	0.898
		1.3126	2.575	1.687	1.15	0.95	2.057	0.887
		0.9501	1.225	0.975	0.9667	1.1838	1.325	5.081
		0.9002	0.9251	5.2	2.525	2.6	4.15	1.825
		1.1338	2.35	4.675	0.8504	1.031	5.4	1.348
		0.9333	2.3625	8.375	6.2001	1.525	1.03	1.718
		1.0167	3.3751	8.725	1.0504	1.817	1.975	1.477
		1.1	4.1	6.25	4.9501	1.183	2.183	0.9
		0.9667	1.2003	1.15	6.625	1.443	2.14	1.545
		0.8681	5.175	3.7333	1.1838	0.85	1.088	1.676
		2.3501	2.65	6.1751	2.7	5.846	1.025	4.732
		1.4834	1.7001	4.5503	0.85	2.144	2.206	2.357
		0.8833	0.975	1.5667	1.525	1.576	3.933	4.55
		1.1628	4.3501	1.8007	4.0251	6.669	1.03	1.373
		1.2251	8.15	1.375	1.0003	0.767	4.56	2.918
		1.0876	7.3003	2.9	1.5502	1.694	1.526	1.154
		0.9625	6.95	3.2001	4.325	2.463	0.97	1.343
		1.7875	4.3751	1.2168	1.0333	1.768	1.014	0.934
		4	0.9173	4.8334	1.1335	1.25	1.634	1.197
		1.6625	2.9502	6.2	1.9	2.291	3.467	1.133
		1.1084	7.751	6.0667	1.225	5.805	3.171	1.53
		1.2171	0.85	6.3752	0.9	5.075	2.383	1.729
		0.9501	2.95	1.075	1.65	1.5	1.3	6.519
		4.25	1.0376	6.9254	3.0251	2.264	1.118	2.338
		1.1677	7.025	4.8	1.7002	0.814	1.2	3.833
		1.3842	4.675	0.9	1.85	1.225	1.002	1.12
		1.1167	0.9251	1.5258	3.6251	1.082	0.973	1.177
		1.1917	1.1126	1.6333	3.4751	1.717	1.83	1.439
		1.3251	1.2584	1.4	1.1753	1.102	1.5	1.179
		1	6.6333	5.1333	2.1506	2.164	1.7	1.463
		1	1.4502	5.6252	0.925	1.278	1.1	5.984
		1.5252	1.7125	3.9507	0.9513	0.85	2.9	3.549
		1.225	1.9003	2.3501	1.6267	4.133	0.9	1.874
		2.1169	2.4667	1.4833	1.3668	5.905	1.2	1.03
		1.4834	3.8167	2.6834	4.9751	1.496	1.8	6.053
		1.3502	4.5001	1.6674	0.825	2.467	0.7	1.733
		1.007	1.05	1.4167	1.059	1.793	1.6	5.176
		2.029	4.0251	1.0501	1.57	5.531	2.1	2.065
		0.975	0.625	6.8752	3.238	1.1	2.5	1.41
		1.559	1.1125	4.025	0.967	3.511	1	2.15
		1.422	2.306	5.8349	4.148	0.833	0.9	1.096
		0.791	2.115	3.3001	2.032	1.692	1.2	0.817
		1.05	0.983	1.226	1.545	0.736	3.2	1.11
		3.221	2.283	2.006	2.605	0.91	6.2	0.988
		0.958	1.694	1.8007	0.8	5.174	0.5	2.2
		4.439	1.517	5.5009	1.167	1.5	4	1.1
		1.079	1.1	3.55	1.483	1.063	1.4	0.6
		1.201	3.217	0.975	2.189	2.712	1.5	0.7
		1.542	3.983	6.4	0.925	2.191	1.4	4.1
		0.866	3.659	3.57	1.559	1.198	4.6	1.8
		1.197	4.403	1.082	3.958	1.319	1.7	2.9
		1.051	3.925	3.6	1.25	1.177	2.2	1.5
		1.041	2.5	1.267	1.125	1.253	1.1	1.7
		3.06	4.8	1.543	2.861	3.654	1.3	1.6
		0.72	1.391	7.526	1.225	1.267	6.8	0.6
		0.85	2.323	1.694	1.209	1.393	0.9	7.7
		1.367	1.729	6.435	1.73	2.117	0.9	1.8
		2.687	3.337	5.2	0.854	1.294	0.9	5.2
		0.884	2.938	7.866	3.708	4.95	0.9	1.3
		1.25	1.038	1.317	1.302	1.998	0.5	0.8
		0.825	2.638	7.169	0.791	1.451	1.2	4.9
		1.036	5.183	1.6	1.17	4.094	0.7	5.7
		1.05	4.845	4.62	0.808	5.156	4.6	0.9
		0.601	1.433	1.047	1.692	1.402	1.7	6.3
		1.117	0.732	5.136	1.112	5.55	1.6	0.7
		1.104	4.695	1.047	1.65	2.463	1.6	1.1
		2.967	0.817	1.7	4.577	1.177	1.1	1.1
		1	1.511	5.102	1.239	0.865	1.2	5.5
		0.72	5.356	3.075	4.807	3.8	1	1.8
			0.989	1.385	2.11	1.842	5.4	0.7
			5.231	1.183	1.36	5.281	7.4	0.4
			5.275	0.965	3.663	1.067	1	3.1
			2.073	1.888	2.151	0.8313	4.9	6.9
			5.676	1.521	1.581	2.14	1.1	6
			5.18	1.398	1.65	3.571	6.4	0.7
			5.356	4.782	1.526	1.824	0.7	1.8
			3.866	1.433	2.567	1.213	1.7	1.9
			1.197	4.303	5.945	1.25	0.9	0.8
			6.155	1.146	2.542	1.667	3.6	1.1
				0.817	1.255	1.294	0.9	2
				3.317	1.54	5.2	1.2	2.1
				4.35	1.335	1.609	1.4	0.7
				7.352	1.54	1.708	2.4	1.3
				1.014	1.612	5.15	2.6	2.1
				4.831	1.004	1.3667	5.2	1.9
				1.377	7.7	1.7002	1.9	0.6
				6.25	1.494	1.359	2.2	6.2
				1.496	1.073	1.225	1.8	0.9
				1.325	2.46	1.5252	0.5	0.9
				2.562	2.261	1.225	1.4	0.8
				2.675	3.202	6.125	1.6	3
				7.284	5.78	1.64	1.1	0.5
					1.698	1.245	3.5	1.1
					1.936	1.195		2.6
					3.901	6.245		5.7
					3.712	1.796		0.9
					1.292	6.1		3.4
					1.262	5.81		0.7
					6.646	2.869		1.8
					2.298	1.447		2
					4.599	2.3		0.5
					1.242	1.655		0.8
					5.03	1.493		1.1
					1.128	1.3		7.2
					1.35	1.994		0.3
					1.302	3.56		1.3
					1.468	4.478		1.2
					1.29	1.525		2.2
					1.723	3.634		0.9
					5.753	1.863		1.1
								1.1
								2.1
								7.9
								0.7
								0.7
								5.1
								1.1
								1
								1.2
								0.8
								5.7
								0.7
								0.4
								1.5
								0.8
								1.1
								0.7
								2.1
								0.9
								0.7
								1
								0.8
								1.4
								1.2
								2.2
